# Supplementary material for: Preschool children’s context-specific sedentary behaviours and parental socioeconomic status in Finland: a cross-sectional study
Source: PubMed Central journal article supplement — BMJ Open. 2017 Nov 3;7(11):e016690. doi: 10.1136/bmjopen-2017-016690 (PMC5695314; doi:10.1136/bmjopen-2017-016690), 2017-11-03
Supplement: bmjopen-2017-016690.draft_revisions.pdf [file bmjopen-2017-016690.draft_revisions.pdf]

# BMJ Open

BMJ Open is committed to open peer review. As part of this commitment we make the peer review history of every article we publish publicly available.

When an article is published we post the peer reviewers' comments and the authors' responses online. We also post the versions of the paper that were used during peer review. These are the versions that the peer review comments apply to.

The versions of the paper that follow are the versions that were submitted during the peer review process. They are not the versions of record or the final published versions. They should not be cited or distributed as the published version of this manuscript.

BMJ Open is an open access journal and the full, final, typeset and author-corrected version of record of the manuscript is available on our site with no access controls, subscription charges or pay-per-view fees (<http://bmjopen.bmj.com>).

If you have any questions on BMJ Open's open peer review process please email [editorial.bmjopen@bmj.com](mailto:editorial.bmjopen@bmj.com)

# BMJ Open

## Preschool children's context-specific sedentary behaviors and parental socioeconomic status: a cross-sectional study

|                                 |                                                                                                                                                                                                                                                                                                                                                                                                                                                                   |
|---------------------------------|-------------------------------------------------------------------------------------------------------------------------------------------------------------------------------------------------------------------------------------------------------------------------------------------------------------------------------------------------------------------------------------------------------------------------------------------------------------------|
| Journal:                        | <i>BMJ Open</i>                                                                                                                                                                                                                                                                                                                                                                                                                                                   |
| Manuscript ID                   | bmjopen-2017-016690                                                                                                                                                                                                                                                                                                                                                                                                                                               |
| Article Type:                   | Research                                                                                                                                                                                                                                                                                                                                                                                                                                                          |
| Date Submitted by the Author:   | 02-Mar-2017                                                                                                                                                                                                                                                                                                                                                                                                                                                       |
| Complete List of Authors:       | Määttä , Suvi; Folkhälsan Research Center; University of Helsinki, Department of Social Research<br>Konttinen, Hanna; University of Helsinki, Department of Social Research<br>Haukkala, Ari; University of Helsinki, Department of Social Research<br>Erkkola, Maijaliisa; University of Helsinki, Department of Food and Environmental Sciences<br>Roos, Eva; Folkhälsan Research Centre; University of Helsinki, Department of Food and Environmental Sciences |
| <b>Primary Subject Heading</b>: | Public health                                                                                                                                                                                                                                                                                                                                                                                                                                                     |
| Secondary Subject Heading:      | Research methods                                                                                                                                                                                                                                                                                                                                                                                                                                                  |
| Keywords:                       | PUBLIC HEALTH, SOCIAL MEDICINE, EPIDEMIOLOGY                                                                                                                                                                                                                                                                                                                                                                                                                      |
|                                 |                                                                                                                                                                                                                                                                                                                                                                                                                                                                   |

SCHOLARONE™  
Manuscripts

1  
2  
3 Preschool children's context-specific sedentary behaviors and parental socioeconomic status:  
4 a cross-sectional study  
5  
6

7 Suvi Määttä <sup>1,2</sup> (suvi.maatta@folkhalsan.fi)  
8

9 Hanna Konttinen <sup>2</sup> (hanna.konttinen@helsinki.fi)  
10

11 Ari Haukkala <sup>2</sup> (ari.haukkala@helsinki.fi)  
12

13 Maijaliisa Erkkola <sup>3</sup> (majjaliisa.erkkola@helsinki.fi)  
14

15 Eva Roos <sup>1,3,4</sup> (eva.roos@folkhalsan.fi)  
16  
17  
18  
19

### 20 **Author affiliations**

21 <sup>1</sup> Folkhälsan Research Center, Helsinki, Finland  
22

23 <sup>2</sup> University of Helsinki, Department of Social Research, Helsinki, Finland.  
24

25 <sup>3</sup> University of Helsinki, Department of Food and Environmental Sciences, Helsinki, Finland  
26

27 <sup>4</sup> University of Helsinki, Clincum, Department of Public Health, Helsinki, Finland  
28  
29

### 30 **Corresponding author:**

31 Suvi Määttä  
32

33 Folkhälsan Research centre, Samfundet Folkhälsan  
34

35 Topeliuksenkatu 20  
36

37 00250 Helsinki, Finland  
38

39 [Suvi.maatta@folkhalsan.fi](mailto:Suvi.maatta@folkhalsan.fi)  
40  
41  
42

43 3324  
44  
45

46 **Word count:**  
47  
48  
49  
50  
51  
52  
53  
54  
55  
56  
57  
58  
59  
60

## Abstract

**Objectives:** This study examined the associations of parental socioeconomic status (SES) a) with preschool children's objectively measured sedentary time (ST) over the course of a week, and b) with preschool children's parent-reported screen and reading time at home as indicators of children's sedentary behaviors (SB).

**Design:** As part of the larger DAGIS project a cross-sectional study was conducted in years 2015 and 2016.

**Setting:** Children and parents were recruited through 66 preschools located in the Western and Southern Finland

**Participants:** 864 children, aged 3-6 years, with their parents.

**Outcome measures:** Children's accelerometer data were transformed into average ST minutes per hour in different contexts (preschool, home during preschool days, weekend and total). Parent-reported children's screen and reading times were expressed as average daily minutes. The SES indicators (maternal and paternal education and relative household income) were grouped into three categories. Linear regression analysis was used, with municipality, season, and children's gender and age as covariates. Confidence intervals were adjusted for clustering at the preschool-group level.

**Results:** Children with low maternal ( $\beta=17.21$ , 95% CI: 8.71, 25.71) and paternal ( $\beta=10.54$ , 95% CI: .77, 20.30) education had more screen time at home than their more advantaged counterparts. Children with low as opposed to high maternal education ( $\beta=-2.66$ , 95% CI: -2.01, -.29) had less reading time at home. Children whose fathers were on the middle ( $\beta=-1.15$ , 95% CI: -2.01, -.29) educational level had less weekend ST than those with high paternal education. Otherwise, parental SES tended not to relate to objectively measured ST.

**Conclusions:** The results of this study highlight the fact that the associations between parental SES and preschoolers' SB are dependent on the indicators of SES and SBs, and vary between different contexts. Interventions aiming to diminish SES differences in children's SB should focus on home hours.

**Keywords:** sedentary lifestyle, preschool, children, socioeconomic factors

**Strengths and limitations of this study:**

- The major strength of this study is that sedentary behaviors were measured using parent-reported diary and accelerometer in a relative large sample of preschool children.
- The another strength of this study is that the associations between parental socioeconomic status and children's sedentary behaviors were studied in separate contexts (e.g. preschool time, weekend).
- The limitation of this study is that the hip-worn accelerometer might not effectively separate standing from sitting and reclining positions.
- The another limitation of this study is that the parent-reported diary may lead to bias in that parents might be unable to constantly monitor their children's behaviors

**INTRODUCTION**

Children as young as preschool age (defined here as aged 3 through 6) spend most of their waking hours in sedentary [1], defined as set of activities requiring low levels of energy and are mainly conducted in sitting or reclining positions [2]. The overall sedentary time (ST) can be broken up into separate sedentary behaviors (SB) – of which some are more harmful to health than others. The detrimental health effects of extensive screen-based SBs, especially TV viewing, on childhood obesity, other cardiometabolic risk markers, motor-skill development, psychosocial wellbeing and cognitive development are recognized in several studies [3-6]. On the other hand, a recent review points out the beneficial effects of reading (or being read to) for early-childhood cognitive development [3]. There are limited indications of associations between overall ST and health indicators among children, but clearer evidence has been found among adults [7-9]. Given the tendency for SBs to track from early childhood to later in life [10], it would be relevant to enhance understanding of their determinants in early childhood.

One important factor to be studied further is parental socioeconomic status (SES). A recent review concludes that a socioeconomic gradient for many predictors of obesity is established in early childhood, and health inequalities in early childhood predict poorer health later in life [11]. Most previous studies focus on the associations between SES and preschoolers' TV viewing, and there is concurrent evidence that preschoolers with a low SES background tend to spend more time watching TV than their counterparts with a high SES [11-13]. However,

1  
2  
3 there is very little evidence with inconsistent findings of the possible SES differences in  
4 preschoolers' objectively measured ST or in other specific SBs, such as reading and other  
5 screen-related SBs [11-14]. Other SBs are known to be major contributors to preschoolers'  
6 overall ST [15], and may have different associations with indicators of SES. Similarly,  
7 different indicators of SES (e.g. education and income) may have different associations with  
8 preschoolers' SBs.  
9

10  
11 Existing studies on preschool children also tend to concentrate on weekly average SBs  
12 without considering the possible differences over the course of the week (e.g. weekdays and  
13 at weekends) or in different settings (e.g. preschool or home). For example, there may be no  
14 SES differences in children's SBs during preschool time given that early educators  
15 predetermine most behaviors and allow little flexibility. During out-of-preschool hours (later  
16 referred as home hours), parents have more an important role for planning and deciding the  
17 activities for their children. Given that SES modifies parental attitudes, experiences, and  
18 exposures to different behaviors [16-18], the behavioral variation among children may be  
19 wider at home. The results of studies conducted among school-aged children suggest that  
20 overall ST is higher after school hours and during weekends [19, 20], hence it would be  
21 relevant to find out if there are also SES differences in ST. A previous study found that  
22 preschoolers' with higher maternal education had more ST in the evenings [21]. However,  
23 specific SBs were not observed in this study, which could explicate the SES differences in  
24 overall ST. This study examines the associations of parental SES a) with preschool children's  
25 objectively measured ST over the course of a week, and b) with preschool children's parent-  
26 reported screen and reading time at home as indicators of their SBs.  
27  
28  
29  
30  
31  
32  
33  
34  
35  
36  
37  
38  
39

## 40 **METHODS**

### 41 **Study design**

42  
43 The DAGIS (Increased Health and Wellbeing in Preschools) study is a long-term project with  
44 multiple data-collection phases. The overarching goal is to diminish socioeconomic  
45 differences in preschoolers' energy-balance-related behaviors (EBRBs)[22]. As part of this  
46 project a cross-sectional study was conducted between autumn 2015 and spring 2016, the aim  
47 being to investigate socioeconomic differences in children's EBRBs. It was a multiple-  
48 method study covering children, parents, and preschools. An ethical permit was obtained  
49 from the University of Helsinki Review Board in the Humanities and Social and Behavioral  
50 Sciences.  
51  
52  
53  
54  
55  
56  
57

### 58 **Study population**

1  
2  
3 The cross-sectional study was conducted in eight municipalities situated in Southern and  
4 Western Finland. Municipalities in Finland are responsible for organizing preschool services  
5 based on national guidelines. Each child has a subjective right to a preschool place, and 74  
6 percent of children aged 3-5 are in preschool. About 76 percent of all children who are in  
7 preschools attend those organized by the municipality. [23] Only municipality-based  
8 preschools were randomly selected for the study. A major recruitment criterion was that there  
9 had to be at least one group of children aged 3-6 in the preschool. Eighty-six heads of  
10 preschools (56% participation rate) gave their written consent for participation in the study.  
11 Once the willingness of the preschools was ascertained information letters and consent forms  
12 were distributed to parents via the respective schools. A major parental recruitment criterion  
13 was to have at least one child aged 3-6 attending preschool regularly. Parents of 983 children  
14 (27% consent rate) gave their written consent for the study. Given the recruitment criterion of  
15 including only preschools with more than a 30-percent consent rate in at least one of the  
16 groups, the survey was conducted in 66 preschools, among a total of 892 children whose  
17 parents had consented to their participation. However, no research data were available on 28  
18 children, hence the final total was 864 children (24% of those invited).

## 30 MEASURES

### 31 Indicators of sedentary behaviors

32 Children wore an Actigraph W-GT3X accelerometer (Actigraph, Pensacola, Florida) on the  
33 hip 24 hours a day for seven days. Actigraph has been validated and used extensively as an  
34 objective measure of physical activity (PA) and ST [24-26]. Research assistant attached  
35 accelerometer to the child's waist in the preschool. The parents received written instructions  
36 about its use. During the seven days the children were wearing the accelerometers the parents  
37 filled in a diary in which they reported their child's sleeping hours and preschool hours, non-  
38 wearing times of the accelerometer, and possible sickness days.

39 The epoch length was set at 15 seconds. Periods of 10 minutes or more at zero accelerometer  
40 counts were considered to be non-wearing times, and were excluded. The Evenson ST cut-  
41 point ( $\leq 100$  counts per minute) was applied [27], having been shown to be a good estimate  
42 of free-living ST [28, 29]. Hours of night sleeping and reported sickness days were excluded  
43 from the analyses. Four variables with different time criteria were formed to indicate different  
44 times of the week: a) total time (at least 600 minutes per day, for at least four days with one  
45 weekend-day); b) preschool ST (at least 240 minutes per day, for at least two days); c) home  
46 ST during preschool days (the same days as used in the preschool variable); d) weekend ST

1  
2  
3 (at least 600 minutes per day). All these variables were adjusted for the wearing hours so as to  
4 indicate the children's ST minutes in an average hour in different contexts. The presented  
5 time criteria were based on previous studies that have estimated the wearing hours and days  
6 that best illustrate preschoolers' habitual ST and PA during a whole measurement week, or in  
7 separate contexts [30-32].  
8  
9

10  
11 The above-mentioned diary included a daily report on the children's SBs that was based on  
12 previously validated method [33]. Of the original method, only the SB section was retained.  
13 We did also modifications for the original version, asking separately about TV watching and  
14 DVD/video watching, and we added the use of tablet computers and smartphones as an  
15 option. The parents were asked to state in the diary whether their child carried out any of the  
16 listed activities while sitting down or being still. They reported daily on whether the child  
17 engaged in a certain activity, how many times and for how many hours and minutes in total.  
18 They were also asked to consider only the time periods outside preschool hours. We used the  
19 following activities from the diary in the present study: reading or looking at a book (later  
20 called reading), TV watching, DVD/video watching, computer use, tablet computer and  
21 smartphone use. The reported hours and minutes devoted to these activities were transformed  
22 into minutes. The use of TV, computers, tablet computers, smartphones and DVD/Videos  
23 were combined into one variable, screen time. The weighted daily averages (5/7 on weekdays  
24 and 2/7 at weekends) of screen time and reading were calculated. No data on specific  
25 preschool-based SBs were collected.  
26  
27  
28  
29  
30  
31  
32  
33  
34  
35  
36

### 37 **Indicators of socioeconomic status**

38 The educational level of both parents was reported in the consent form: they were asked to  
39 rank their highest educational attainment on a seven-item list. The response options were re-  
40 organized into three groups: a low education was defined as comprehensive schooling  
41 (usually from ages 7 to 16) to secondary education (usually ages 16 to 19); a medium level  
42 refers to a Bachelor's degree; and a high education as at least a Master's Degree.  
43  
44  
45  
46  
47

48 Household income was elicited in the parental questionnaire. The parents were asked to report  
49 the extent of the entire household net income (after tax) on average per month, taking into  
50 account any regular income after tax such as earnings and capital gains, pensions, child  
51 benefits and other social benefits. The response options ranged from less than 500 (1), to over  
52 10,000 (10) Euros per month. The total household net income was divided by the number of  
53 family members using a standard equivalence scale that gave a weight to all members of the  
54 household [34]. This relative household-income variable was categorized into tertiles. Low-  
55  
56  
57  
58  
59  
60



1  
2  
3 income families had a monthly-equalized income of less than 1,894 Euros, and high-income  
4 families an income of 2,501 Euros or more.

### 7 **Covariates**

8  
9 The analyses were adjusted for municipality, the child's age and gender, and the season  
10 during which the accelerometer was used. Parents reported the child's age and gender. Age  
11 was treated as continuous variable in the analyses. The season variable was divided into three  
12 categories: 1=September-October, 2= November-December, and 3=January-April. Both the  
13 season and the municipality variables were treated as dummy variables.  
14  
15  
16

### 17 **Statistical analyses**

18  
19 The SPSS version 23 (SPSS Inc., Chicago, IL, USA) was used to derive the descriptive  
20 statistics. Screen time (N=4) and home ST (N=1) had outliers beyond three standard  
21 deviations of the mean, and were thus removed from the analyses.  
22  
23

24  
25 Linear regression analyses were conducted to examine the associations between the SES  
26 indicators and each SB variable. For this we used Mplus Version 7.4. (Muthen & Muthen, Los  
27 Angeles, CA, USA) with Maximum Likelihood Estimation and Robust Standard Errors  
28 (MLR). The non-independence of observations due to cluster sampling (children in the  
29 preschool groups) was taken into account in the analyses, and the highest SES group was  
30 treated as a reference category.  
31  
32  
33  
34

### 35 **RESULTS**

36  
37 Of the 864 participating children, 17 (2%) did not want to wear the accelerometer and 20  
38 (2%) did not return the diary. In addition, two accelerometers were not installed properly and  
39 two were not returned. We therefore had data from 821 children (95% of the participants) to  
40 be used in forming the variables. In accordance with the criteria presented above, between  
41 772 and 789 children had produced the required amount of accelerometer data for the  
42 analyses. Those who did not produce valid accelerometer data for total time and weekend ST  
43 were more likely to have a mother with a lower level of education than those who produced  
44 valid accelerometer data (data not shown). A total of 771 children filled in the diary properly.  
45  
46 There were no differences in SES indicators between those who produced valid or invalid  
47 diary data. Parent-reported daily screen time correlated positively with objectively measured  
48 home ST ( $r=0.95$ ,  $P=0.010$ ) and with weekend ST ( $r=0.92$ ,  $P=0.013$ ), but negatively with  
49 preschool ST ( $r=-0.14$ ,  $P=0.000$ ). Reading did not correlate with any other outcomes.  
50  
51 Maternal education correlated with paternal education ( $r=0.487$ ,  $P=0.000$ ) and relative  
52  
53  
54  
55  
56  
57  
58  
59  
60

household income ( $r=0.305$ ,  $P=0.000$ ), and paternal education correlated with relative household income ( $r=0.320$ ,  $P=0.000$ ). Sample characteristics of the participants are described in Table 1.

Table 1 Sample Characteristics in the Increased Health and Wellbeing in Preschool (DAGIS) study conducted between years 2015 and 2016 in Finland (N=864)

| Measure                                                            | Value <sup>1</sup> | N   |
|--------------------------------------------------------------------|--------------------|-----|
| Children's age                                                     | 4.73 (.89)         | 864 |
| Children's gender                                                  |                    |     |
| Girls                                                              | 48%                | 413 |
| Boys                                                               | 52%                | 450 |
| Season during which the accelerometer was worn                     |                    |     |
| September-October                                                  | 44%                | 354 |
| November-December                                                  | 36%                | 290 |
| January-April                                                      | 20%                | 164 |
| Maternal education                                                 |                    |     |
| Low (1)                                                            | 30%                | 265 |
| Medium (2)                                                         | 41%                | 358 |
| High (3)                                                           | 29%                | 256 |
| Paternal education                                                 |                    |     |
| Low (1)                                                            | 45%                | 365 |
| Medium (2)                                                         | 33%                | 267 |
| High (3)                                                           | 22%                | 181 |
| Household income                                                   |                    |     |
| Low (1)                                                            | 32%                | 224 |
| Medium (2)                                                         | 34%                | 232 |
| High (3)                                                           | 34%                | 235 |
| Children's sedentary time measured by the accelerometer (min/hour) |                    |     |
| Total time                                                         | 28.11 (4.01)       | 772 |
| Preschool                                                          | 26.47 (5.11)       | 778 |

|    |                           |                |                |     |
|----|---------------------------|----------------|----------------|-----|
| 1  |                           |                |                |     |
| 2  |                           |                |                |     |
| 3  |                           | Home time in   | 29.74 (4.96)   | 777 |
| 4  |                           | preschool days |                |     |
| 5  |                           |                |                |     |
| 6  |                           | Weekend        | 28.47 (4.76)   | 779 |
| 7  |                           |                |                |     |
| 8  | Children's sedentary time |                |                |     |
| 9  | measured in the diary     |                |                |     |
| 10 | (min/day)                 |                |                |     |
| 11 |                           |                |                |     |
| 12 |                           | Screen time    | 111.02 (48.50) | 767 |
| 13 |                           | TV use         | 56.14 (28.20)  | 771 |
| 14 |                           |                |                |     |
| 15 |                           | Computer use   | 9.06 (20.32)   | 771 |
| 16 |                           |                |                |     |
| 17 |                           | Tablet/smart   | 21.82 (26.18)  | 771 |
| 18 |                           | phone use      |                |     |
| 19 |                           |                |                |     |
| 20 |                           | DVD/video      | 25.66 (30.50)  | 771 |
| 21 |                           | use            |                |     |
| 22 |                           |                |                |     |
| 23 |                           | Reading        | 19.19 (11.35)  | 765 |

<sup>1</sup> Values are mean (Standard Deviation) unless otherwise stated. N=864

Table 2 presents the results on the associations of maternal education, paternal education, and relative household income with objectively measured preschool children's ST in different contexts. According to the findings, children whose fathers had a medium as opposed to a high level of education had, on average, 1.2 minutes less weekend ST per hour.

Table 2. The associations between parental socioeconomic status and preschool children's objectively measured sedentary time (minutes/hour) over the course of the week measured by means of linear regression models, adjusted for municipality, season, and the children's gender and age in the Increased Health and Wellbeing in Preschool (DAGIS) study conducted between years 2015 and 2016 in Finland

| Socioeconomic status<br>Indicator        | Sedentary time in preschool |                 |                  | Home sedentary time in preschool days |                     |                  | Sedentary time in weekends |                 |                  | Total sedentary time |                 |                  |
|------------------------------------------|-----------------------------|-----------------|------------------|---------------------------------------|---------------------|------------------|----------------------------|-----------------|------------------|----------------------|-----------------|------------------|
|                                          | $\beta$                     | Lower<br>95% CI | Higher<br>95% CI | $\beta$                               | Lower<br>95 %<br>CI | Higher<br>95% CI | $\beta$                    | Lower<br>95% CI | Higher<br>95% CI | $\beta$              | Lower<br>95% CI | Higher<br>95% CI |
| Maternal education (N between 738 – 744) |                             |                 |                  |                                       |                     |                  |                            |                 |                  |                      |                 |                  |
| Low                                      | .46                         | -.45            | 1.36             | .47                                   | -.53                | 1.47             | -.09                       | -.71            | .90              | .33                  | -.35            | 1.00             |
| Medium                                   | -.53                        | -1.37           | .31              | .44                                   | -.28                | 1.17             | -.17                       | -.94            | .59              | -.22                 | -.83            | .40              |
| High (reference)                         |                             |                 |                  |                                       |                     |                  |                            |                 |                  |                      |                 |                  |
| Paternal education (N between 682 – 691) |                             |                 |                  |                                       |                     |                  |                            |                 |                  |                      |                 |                  |
| Low                                      | -.17                        | -1.14           | .79              | .05                                   | -.86                | .96              | -.49                       | -1.25           | .27              | -.02                 | -.68            | .63              |
| Medium                                   | -.28                        | -1.28           | .72              | .10                                   | -.78                | .99              | -1.15                      | -2.01           | -.29             | -.46                 | -1.10           | .18              |
| High (reference)                         |                             |                 |                  |                                       |                     |                  |                            |                 |                  |                      |                 |                  |
| Household income (N between 639 – 646)   |                             |                 |                  |                                       |                     |                  |                            |                 |                  |                      |                 |                  |
| Low                                      | .47                         | -.34            | 1.28             | -.85                                  | -1.76               | .06              | -.52                       | -1.27           | .24              | -.11                 | -.74            | .51              |
| Medium                                   | -.34                        | -1.16           | .49              | -.22                                  | -.99                | .54              | -.05                       | -.83            | .73              | -.13                 | -.69            | .44              |
| High (reference)                         |                             |                 |                  |                                       |                     |                  |                            |                 |                  |                      |                 |                  |

1  
2  
3  
4  
5 Table 3 presents the results on the associations of maternal education, paternal education, and  
6 family income with their children's daily screen time and reading time at home. Compared to  
7 children whose mothers had a high level of education, those with a low or a medium level of  
8 maternal education had, respectively and on average, 17.21 and 11.17 minutes more screen  
9 time daily. Children whose fathers had a low level of education had 10.54 minutes more  
10 screen time than their counterparts with high paternal education. Children whose mothers had  
11 a low level of education had, on average, 2.66 minutes less reading time daily than their  
12 counterparts with high maternal education.  
13  
14  
15  
16  
17  
18  
19  
20  
21  
22  
23  
24  
25  
26  
27  
28  
29  
30  
31  
32  
33  
34  
35  
36  
37  
38  
39  
40  
41  
42  
43  
44  
45  
46  
47  
48  
49  
50  
51  
52  
53  
54  
55  
56  
57  
58  
59  
60

Table 3. The associations between parental socioeconomic status and preschool children's daily average screen and reading time at home measured by means of linear regression analysis, and adjusted for municipality, research time, and the children's gender and age in the Increased Health and Wellbeing in Preschool (DAGIS) study conducted between years 2015 and 2016 in Finland

| Socioeconomic status<br>Indicator        | Daily screen time at home (min/day) |                 |                  | Daily reading time at home (min/day) |                 |                  |
|------------------------------------------|-------------------------------------|-----------------|------------------|--------------------------------------|-----------------|------------------|
|                                          | $\beta$                             | Lower<br>95% CI | Higher<br>95% CI | $\beta$                              | Lower<br>95% CI | Higher<br>95% CI |
| Maternal education (N between 726 – 728) |                                     |                 |                  |                                      |                 |                  |
| Low                                      | 17.21                               | 8.71            | 25.71            | -2.66                                | -4.95           | -.38             |
| Medium                                   | 11.17                               | 3.69            | 18.64            | -1.82                                | -3.79           | .15              |
| High (reference)                         |                                     |                 |                  |                                      |                 |                  |
| Paternal education (N between 674 – 676) |                                     |                 |                  |                                      |                 |                  |
| Low                                      | 10.54                               | 0.77            | 20.30            | -2.31                                | -4.85           | .23              |
| Medium                                   | -1.17                               | -11.07          | 8.74             | -1.66                                | -4.32           | .99              |
| High (reference)                         |                                     |                 |                  |                                      |                 |                  |
| Household income (N=628)                 |                                     |                 |                  |                                      |                 |                  |
| Low                                      | 9.82                                | -.13            | 19.78            | -1.34                                | -3.60           | .92              |
| Medium                                   | 6.60                                | -2.41           | 15.60            | .14                                  | -2.07           | 2.34             |
| High (reference)                         |                                     |                 |                  |                                      |                 |                  |

## DISCUSSION

In sum, the main findings of this study show that children with low parental education had more screen time at home than their counterparts with highly educated parents, whereas those whose mothers had a higher as opposed to a lower level of education had more reading time. Otherwise, parental SES was mainly unrelated to the children's objectively measured ST over the course of the week.

The findings also revealed that preschoolers with lower parental education had between 10 (paternal education) and 17 (maternal education) minutes more daily screen time at home than their counterparts with higher parental education. Previous studies have also reported a similar pattern of SES differences [11], but this study brings additional knowledge that the overall screen time not only TV viewing is higher among preschoolers with low parental education. Different types of screens have become part of everyday life in families with preschoolers, and controlling screen use may be difficult for parents. Higher as opposed to lower parental education is usually related to enhanced awareness, capabilities and skills in terms of adopting a healthy lifestyle [17]. Screen-time reduction may require additional resources (e.g. financial, time) that parents are not necessarily able to provide, which in turn could add to parental stress [35, 36]. Stress in combination with a lack of resources might make it challenging for parents with a low educational level to limit screen time among their children.

Parents seem to value optimal cognitive development during early childhood [37]. Previous studies have illustrated that parents of preschool-aged children consider screen-time activities to be good educational tools, whereas the detrimental effects of extensive screen time on cognitive development is not mentioned [38-41]. These studies have not taken possible SES differences into consideration. Parents with a higher level of education might realize the harmful health effects of increased screen time and place more value on their children's educational achievements, and therefore encourage them to spend more time with books instead of watching a screen. It may be that parents with a low educational background do not realize the detrimental effects of screen time on cognitive development, and place more value on the educational aspects. Still, it should be acknowledged that some aspects of screen time could be educational. Applications in touch-screen devices such as tablet computers and smart phones are being used to an increasing extent as learning tools in preschools, for example.

1  
2  
3 However, there is little current research about the real educational benefits of using these tools  
4 [42]. The results of some studies suggest that the use of touch-screen devices inhibits social  
5 interaction and children's ability to self-regulate their behavior, although benefits related to  
6 early literacy skills, the stimulation of concentration and the fostering of independent learning  
7 are also acknowledged [42]. Nevertheless, screen time is usually sedentary in nature, and it is  
8 therefore important to limit its use.  
9  
10

11  
12  
13 The finding that reading and screen time had opposite relationships with parental SES attests  
14 to the necessity of measuring different types of SBs to fully understand the SES differences.  
15 SES differences in reading time in early childhood are seldom addressed in SB studies, for  
16 example, although its beneficial influences on cognitive development and school readiness are  
17 recognized [3, 43]. These contradictory SES associations with different types of SBs could  
18 also partly explain the few associations between overall objectively measured ST and  
19 indicators of SES found in this study. It would therefore be relevant to consider whether it  
20 might be more worthwhile focusing on the type of SB than overall ST in research on SES  
21 differences in children's SB. Similarly, the wide variation of screens currently available  
22 ensures variation in the way they are used. Tablet computers and mobile devices are used not  
23 only as behavioral-control tools to calm down or distract children in restaurants and cars, but  
24 also for educational purposes [35, 42, 44]. It may be worth considering the context in which  
25 the devices are used in future studies, as well as potential SES differences in the way they are  
26 used.  
27  
28  
29  
30  
31  
32  
33  
34  
35  
36

37 We did not find any SES differences in ST during preschool hours: to our knowledge, no  
38 other studies have addressed this issue. However, our finding is inconsistent with a previous  
39 study on school-aged children reporting that offspring with parents educated to university  
40 level or higher had less ST in schools than children with less highly educated parents [45].  
41 The school setting with its compulsory lessons is different than the preschool setting,  
42 however. The Finnish preschool model is based on learning by playing, and compulsory pre-  
43 primary education in preparation for official schooling starts at the age of six [46]. We  
44 excluded pre-primary education classes during the recruitment phase of the DAGIS study.  
45 However, we did not measure children's specific SBs during preschool hours in more detail:  
46 we thought it would be too time-consuming to list specific SBs in diaries for each child in the  
47 preschool group. According to our preparatory work before we conducted this cross-sectional  
48 survey, the availability of screens in Finnish preschools is limited [47]. More research is  
49 therefore needed to shed light on the role of preschools in balancing SES differences in  
50  
51  
52  
53  
54  
55  
56  
57  
58  
59  
60



1  
2  
3 children's SB. Future studies could compare the associations between SES and SB among  
4 children who are attending preschool and those who are mainly cared for at home, for  
5 example.  
6  
7

8  
9 There are some limitations that should be taken into account in interpreting the results of our  
10 study. The DAGIS study is cross-sectional, and therefore the causality between parental SES  
11 and children's SB cannot be fully established. There are several accelerometer cut-points for  
12 ST among preschool children, and there is no consensus as to which are the most suitable.  
13 However, the results of a recent comparative study support the choice of Evenson cut-points  
14 for measuring ST [48]. Moreover, the hip-worn accelerometer might not give the most  
15 accurate measurements because it does not effectively separate standing from sitting and  
16 reclining positions [28]. The information on children's screen time and reading was based on  
17 parental reports, and as with any other reported information, proxy reports may lead to bias in  
18 that parents might be unable to constantly monitor their children's behaviors [49, 50].  
19 Nevertheless, the diary is generally considered to be more reliable than a few items in a  
20 questionnaire [51]. A major strength of this study is that it encompasses a large sample,  
21 including children from 66 different preschools in various municipalities. Another strength is  
22 that we measured the preschoolers' overall ST and specific SBs, and used several SES  
23 indicators. We also separated the different times of the week from the accelerometer data. We  
24 therefore contributed new information on how parental SES influences engagement in  
25 specific SBs and ST in different contexts. These novel data will be useful for future  
26 interventions focusing on diminishing preschoolers' SBs.  
27  
28  
29  
30  
31  
32  
33  
34  
35  
36  
37

### 38 **Conclusion**

39  
40 The most consistent finding from this study is that overall daily screen time at home is higher  
41 among children with a low parental-educational background even at preschool age. It would  
42 therefore be valuable to develop strategies aimed at diminishing screen time at home among  
43 these children. The findings exemplify the multidimensionality of the relationship between  
44 preschoolers' SBs and parental SES. Including multiple measurements of SBs and several  
45 indicators of parental SES, and taking into account the different contexts over the course of a  
46 week (e.g. preschool, weekend) would deepen understanding of the association between SES  
47 and preschoolers' SB.  
48  
49  
50  
51  
52  
53  
54  
55  
56  
57  
58  
59  
60

**Acknowledgements:** The authors thank the preschools and their personnel, and the parents for their participation in the DAGIS study, and the staff for the data collection.

**Authors' contributions:** SM drafted the manuscript and conducted the analyses of this study. HK helped in conducting the analyses and drafting the manuscript. ME, AH and ER helped in drafting the manuscript. SM, ME and E were involved in the design of the study and in seeking funding for it. R ER was the principal investigator of the DAGIS study and was responsible for the study conduct. All authors revised the article critically for important intellectual content and approved the final manuscript.

**Funding statement:** This study was financially supported by the Folkhälsan Research Center, The Ministry of Education and Culture in Finland, The Academy of Finland (Grant: 285439), The Juho Vainio Foundation, The Yrjö Jahnsson Foundation, the Signe and Ane Gyllenberg Foundation, The Finnish Cultural Foundation/South Ostrobothnia Regional Fund, the Päivikki and Sakari Sohlberg foundation, and the Medicinska Föreningen Liv och Hälsa.

**Conflicts of interest:** none

**Ethics approval:** the University of Helsinki Review Board in the Humanities and Social and Behavioral Sciences

**Data sharing statement:** Researchers interested in the data from this study may contact principal investigator Eva Roos, [eva.roos@folkhalsan.fi](mailto:eva.roos@folkhalsan.fi).

## REFERENCES:

1 Verloigne M, Loyen A, Van Hecke L, et al. Variation in population levels of sedentary time in European children and adolescents according to cross-European studies: a systematic literature review within DEDIPAC, *Int J Behav Nutr Phys Act* 2016;13:69,016-0395-5.

2 Sedentary Behaviour Research Network. Letter to the editor: standardized use of the terms "sedentary" and "sedentary behaviours", *Applied Physiology, Nutrition, and Metabolism* 2012;37:540-2.

3 Carson V, Kuzik N, Hunter S, et al. Systematic review of sedentary behavior and cognitive development in early childhood, *Prev Med* 2015;78:115-22.

4 de Rezende LF, Rodrigues Lopes M, Rey-Lopez JP, et al. Sedentary behavior and health outcomes: an overview of systematic reviews, *PLoS One* 2014;9:e105620.

- 1  
2  
3 5 Hinkley T, Teychenne M, Downing K, et al. Early childhood physical activity, sedentary  
4 behaviors and psychosocial well-being: a systematic review, *Preventive medicine*  
5 2014;62:182-92.  
6
- 7 6 LeBlanc AG, Spence JC, Carson V, et al. Systematic review of sedentary behaviour and  
8 health indicators in the early years (aged 0-4 years), *Appl Physiol Nutr Metab* 2012;37:753-  
9 72.  
10
- 11 7 Cliff DP, Hesketh KD, Vella SA, et al. Objectively measured sedentary behaviour and  
12 health and development in children and adolescents: systematic review and meta-analysis,  
13 *Obes Rev* 2016;17:330-44.  
14
- 15 8 van Ekris E, Altenburg TM, Singh AS, et al. An evidence-update on the prospective  
16 relationship between childhood sedentary behaviour and biomedical health indicators: a  
17 systematic review and meta-analysis, *Obes Rev* 2016.  
18
- 19 9 Wilmot EG, Edwardson CL, Achana FA, et al. Sedentary time in adults and the association  
20 with diabetes, cardiovascular disease and death: systematic review and meta-analysis,  
21 *Diabetologia* 2012;55:2895-905.  
22
- 23 10 Biddle SJ, Pearson N, Ross GM, et al. Tracking of sedentary behaviours of young people:  
24 a systematic review, *Prev Med* 2010;51:345-51.  
25
- 26 11 Cameron AJ, Spence AC, Laws R, et al. A Review of the Relationship Between  
27 Socioeconomic Position and the Early-Life Predictors of Obesity, *Curr Obes Rep* 2015;4:350-  
28 62.  
29
- 30 12 Hinkley T, Salmon J, Okely AD, et al. Correlates of sedentary behaviours in preschool  
31 children: a review, *Int J Behav Nutr Phys Act* 2010;7:66,5868-7-66.  
32
- 33 13 Hoyos Cillero I, Jago R. Systematic review of correlates of screen-viewing among young  
34 children, *Prev Med* 2010;51:3-10.  
35
- 36 14 De Craemer M, De Decker E, De Bourdeaudhuij I, et al. Correlates of energy balance-  
37 related behaviours in preschool children: a systematic review, *Obes Rev* 2012;13 Suppl 1:13-  
38 28.  
39
- 40 15 De Craemer M, Lateva M, Iotova V, et al. Differences in energy balance-related  
41 behaviours in European preschool children: the ToyBox-study, *PLoS One* 2015;10:e0118303.  
42
- 43 16 Ball K, Crawford D. Socio-economic factors in obesity: a case of slim chance in a fat  
44 world? *Asia Pacific Journal of Clinical Nutrition* 2006;15:15-20.  
45
- 46 17 Glymour MM, Avendano M, Kawachi I. Socioeconomic status and health. In: Berkman  
47 LF, Kawachi I, Glymour MM, eds. *Social epidemiology*. New York: Oxford University Press  
48 2014:17-62.  
49
- 50 18 Mantziki K, Vassilopoulos A, Radulian G, et al. Inequities in energy-balance related  
51 behaviours and family environmental determinants in European children: baseline results of  
52 the prospective EPHE evaluation study, *BMC Public Health* 2015;15:1203,015-2540-5.  
53  
54  
55  
56  
57  
58  
59  
60

- 1  
2  
3 19 Arundell L, Fletcher E, Salmon J, et al. A systematic review of the prevalence of sedentary  
4 behavior during the after-school period among children aged 5-18 years, *Int J Behav Nutr*  
5 *Phys Act* 2016;13:93,016-0419-1.  
6
- 7 20 Beck J, Chard CA, Hilzendegen C, et al. In-school versus out-of-school sedentary behavior  
8 patterns in U.S. children, *BMC Obes* 2016;3:34,016-0115-3. eCollection 2016.  
9
- 10 21 Hesketh KR, McMinn AM, Ekelund U, et al. Objectively measured physical activity in  
11 four-year-old British children: a cross-sectional analysis of activity patterns segmented across  
12 the day, *Int J Behav Nutr Phys Act* 2014;11:1,5868-11-1.  
13
- 14 22 Määttä S, Lehto R, Nislin M, et al. Increased health and wellbeing in preschools (DAGIS):  
15 rationale and design for a randomized control, *BMC public health* 2015;15:402.  
16
- 17 23 National Institute for Health and Welfare. Lasten päivähöito [Children's early childhood  
18 education and care 2015], *Statistical report 21/2019, 29.12.2016*. 2016. Assessed January  
19 30<sup>th</sup>, 2017: [https://www.thl.fi/fi/tilastot/tilastot-aiheittain/lasten-nuorten-ja-perheiden-](https://www.thl.fi/fi/tilastot/tilastot-aiheittain/lasten-nuorten-ja-perheiden-sosiaalipalvelut/lasten-paivahoito)  
20 [sosiaalipalvelut/lasten-paivahoito](https://www.thl.fi/fi/tilastot/tilastot-aiheittain/lasten-nuorten-ja-perheiden-sosiaalipalvelut/lasten-paivahoito)  
21  
22  
23
- 24 24 Janssen X, Cliff DP, Reilly JJ, et al. Predictive validity and classification accuracy of  
25 ActiGraph energy expenditure equations and cut-points in young children, *PLoS One*  
26 2013;8:e79124.  
27
- 28 25 Pate RR, Almeida MJ, McIver KL, et al. Validation and calibration of an accelerometer in  
29 preschool children, *Obesity (Silver Spring)* 2006;14:2000-6.  
30
- 31 26 Puyau MR, Adolph AL, Vohra FA, et al. Validation and calibration of physical activity  
32 monitors in children, *Obes Res* 2002;10:150-7.  
33  
34
- 35 27 Evenson KR, Catellier DJ, Gill K, et al. Calibration of two objective measures of physical  
36 activity for children, *J Sports Sci* 2008;26:1557-65.  
37
- 38 28 Ridgers ND, Salmon J, Ridley K, et al. Agreement between activPAL and ActiGraph for  
39 assessing children's sedentary time, *Int J Behav Nutr Phys Act* 2012;9:15,5868-9-15.  
40  
41
- 42 29 Trost SG, Loprinzi PD, Moore R, et al. Comparison of accelerometer cut points for  
43 predicting activity intensity in youth, *Med Sci Sports Exerc* 2011;43:1360-8.  
44
- 45 30 Byun W, Beets MW, Pate RR. Sedentary Behavior in Preschoolers: How Many Days of  
46 Accelerometer Monitoring Is Needed? *Int J Environ Res Public Health* 2015;12:13148-61.  
47  
48
- 49 31 Hinkley T, O'Connell E, Okely AD, et al. Assessing volume of accelerometry data for  
50 reliability in preschool children, *Med Sci Sports Exerc* 2012;44:2436-41.  
51
- 52 32 Rich C, Geraci M, Griffiths L, et al. Quality control methods in accelerometer data  
53 processing: defining minimum wear time, *PLoS One* 2013;8:e67206.  
54
- 55 33 Wen LM, van der Ploeg HP, Kite J, et al. A Validation Study of Assessing Physical  
56 Activity and Sedentary Behavior in Children Aged 3 to 5 Years, *Pediatric Exercise Science*  
57 2010;22:408.  
58  
59  
60

1  
2  
3 34 Statistics Finland. Official Statistics of Finland (OSF): Income distribution statistics [e-  
4 publication]. 2016. Assessed January 30<sup>th</sup>, 2017: [http://www.stat.fi/til/tjt/kas\\_en.html](http://www.stat.fi/til/tjt/kas_en.html)

5  
6 35 Bentley GF, Turner KM, Jago R. Mothers' views of their preschool child's screen-viewing  
7 behaviour: a qualitative study, *BMC public health* 2016;16.

8  
9 36 Evans CA, Jordan AB, Horner J. Only Two Hours? A Qualitative Study of the Challenges  
10 Parents Perceive in Restricting Child Television Time, *Journal of Family Issues*  
11 2015;32:1223-44.

12  
13 37 Carson V, Clark M, Berry T, et al. A qualitative examination of the perceptions of parents  
14 on the Canadian Sedentary Behaviour Guidelines for the early years, *Int J Behav Nutr Phys*  
15 *Act* 2014;11:65,5868-11-65.

16  
17 38 Carson V, Tremblay MS, Spence JC, et al. The Canadian Sedentary Behaviour Guidelines  
18 for the Early Years (zero to four years of age) and screen time among children from Kingston,  
19 Ontario, *Paediatr Child Health* 2013;18:25-8.

20  
21 39 De Decker E, De Craemer M, De Bourdeaudhuij I, et al. Influencing factors of screen time  
22 in preschool children: an exploration of parents' perceptions through focus groups in six  
23 European countries, *Obes Rev* 2012;13 Suppl 1:75-84.

24  
25 40 Dwyer GM, Higgs J, Hardy LL, et al. What do parents and preschool staff tell us about  
26 young children's physical activity: a qualitative study, *Int J Behav Nutr Phys Act*  
27 2008;5:66,5868-5-66.

28  
29 41 He M, Irwin JD, Sangster Bouck LM, et al. Screen-viewing behaviors among preschoolers  
30 parents' perceptions, *Am J Prev Med* 2005;29:120-5.

31  
32 42 Radesky JS, Schumacher J, Zuckerman B. Mobile and interactive media use by young  
33 children: the good, the bad, and the unknown, *Pediatrics* 2015;135:1-3.

34  
35 43 Mollborn S, Lawrence E, James-Hawkins L, et al. When Do Socioeconomic Resources  
36 Matter Most in Early Childhood? *Adv Life Course Res* 2014;20:56-9.

37  
38 44 Radesky JS, Kistin CJ, Zuckerman B, et al. Patterns of mobile device use by caregivers  
39 and children during meals in fast food restaurants, *Pediatrics* 2014;133:e843-9.

40  
41 45 Pulsford RM, Griew P, Page AS, et al. Socioeconomic position and childhood sedentary  
42 time: evidence from the PEACH project, *Int J Behav Nutr Phys Act* 2013;10:105,5868-10-  
43 105.

44  
45 46 The Finnish National Agency of Education. Early Childhood education and care.;2016.  
46 Assessed January 30<sup>th</sup>, 2017: <http://www.julkari.fi/handle/10024/131666>

47  
48 47 Määttä S, Ray C, Roos G, et al. Applying a Socioecological Model to Understand  
49 Preschool Children's Sedentary Behaviors from the Viewpoints of Parents and Preschool  
50 Personnel, *Early Childhood Education Journal* 2016;44:491-502.

1  
2  
3 48 Kim Y, Lee JM, Peters BP, et al. Examination of different accelerometer cut-points for  
4 assessing sedentary behaviors in children, *PLoS One* 2014;9:e90630.

5  
6 49 Corder K, Crespo NC, van Sluijs EM, et al. Parent awareness of young children's physical  
7 activity, *Prev Med* 2012;55:201-5.

8  
9 50 Verbestel V, De Henauw S, Bammann K, et al. Are context-specific measures of parental-  
10 reported physical activity and sedentary behaviour associated with accelerometer data in 2-9-  
11 year-old European children? *Public Health Nutr* 2015;18:860-8.

12  
13 51 Bryant M, Lucove J, Evenson K, et al. Measurement of television viewing in children and  
14 adolescents: a systematic review. *Obesity Reviews* 2007;8:197-209.  
15  
16  
17  
18  
19  
20  
21  
22  
23  
24  
25  
26  
27  
28  
29  
30  
31  
32  
33  
34  
35  
36  
37  
38  
39  
40  
41  
42  
43  
44  
45  
46  
47  
48  
49  
50  
51  
52  
53  
54  
55  
56  
57  
58  
59  
60

## STROBE Statement—checklist of items that should be included in reports of observational studies

|                           | Item No. | Recommendation                                                                                                                  | Page No. | Relevant text from manuscript                                                                                                                                                                                                                     |
|---------------------------|----------|---------------------------------------------------------------------------------------------------------------------------------|----------|---------------------------------------------------------------------------------------------------------------------------------------------------------------------------------------------------------------------------------------------------|
| <b>Title and abstract</b> | 1        | (a) Indicate the study's design with a commonly used term in the title or the abstract                                          | 1        | Preschool children's context-specific sedentary behaviors and parental socioeconomic status: a cross-sectional study                                                                                                                              |
|                           |          | (b) Provide in the abstract an informative and balanced summary of what was done and what was found                             | 2        | abstract                                                                                                                                                                                                                                          |
| <b>Introduction</b>       |          |                                                                                                                                 |          |                                                                                                                                                                                                                                                   |
| Background/rationale      | 2        | Explain the scientific background and rationale for the investigation being reported                                            | 3-4      | Introduction                                                                                                                                                                                                                                      |
| Objectives                | 3        | State specific objectives, including any prespecified hypotheses                                                                | 4        | This study examines the associations of parental SES a) with preschool children's objectively measured ST over the course of a week, and b) with preschool children's parent-reported screen and reading time at home as indicators of their SBs. |
| <b>Methods</b>            |          |                                                                                                                                 |          |                                                                                                                                                                                                                                                   |
| Study design              | 4        | Present key elements of study design early in the paper                                                                         | 4        |                                                                                                                                                                                                                                                   |
| Setting                   | 5        | Describe the setting, locations, and relevant dates, including periods of recruitment, exposure, follow-up, and data collection | 4-5      | As part of this project a cross-sectional study was conducted between autumn 2015 and spring 2016....                                                                                                                                             |

|                                                                               |                              |    |                                                                                                                                                                                                                                                                                                                                                                                                                                                                                                                                                                                                                                                                                                                          |     |                                                                                                                                                                                                                                                 |
|-------------------------------------------------------------------------------|------------------------------|----|--------------------------------------------------------------------------------------------------------------------------------------------------------------------------------------------------------------------------------------------------------------------------------------------------------------------------------------------------------------------------------------------------------------------------------------------------------------------------------------------------------------------------------------------------------------------------------------------------------------------------------------------------------------------------------------------------------------------------|-----|-------------------------------------------------------------------------------------------------------------------------------------------------------------------------------------------------------------------------------------------------|
| 1<br>2<br>3<br>4<br>5<br>6<br>7<br>8<br>9<br>10<br>11<br>12<br>13<br>14<br>15 | Participants                 | 6  | <p>(a) <i>Cohort study</i>—Give the eligibility criteria, and the sources and methods of selection of participants. Describe methods of follow-up</p> <p><i>Case-control study</i>—Give the eligibility criteria, and the sources and methods of case ascertainment and control selection. Give the rationale for the choice of cases and controls</p> <p><i>Cross-sectional study</i>—Give the eligibility criteria, and the sources and methods of selection of participants</p> <hr/> <p>(b) <i>Cohort study</i>—For matched studies, give matching criteria and number of exposed and unexposed</p> <p><i>Case-control study</i>—For matched studies, give matching criteria and the number of controls per case</p> | 4-5 | Parents of 983 children (27% consent rate) gave their written consent for the study. Given the recruitment criterion of including only preschools with....                                                                                      |
| 16<br>17<br>18<br>19<br>20<br>21<br>22                                        | Variables                    | 7  | Clearly define all outcomes, exposures, predictors, potential confounders, and effect modifiers. Give diagnostic criteria, if applicable                                                                                                                                                                                                                                                                                                                                                                                                                                                                                                                                                                                 | 5-6 | Indicators of sedentary behaviors<br>Children wore an Actigraph W-GT3X accelerometer...                                                                                                                                                         |
| 23<br>24<br>25<br>26<br>27<br>28<br>29<br>30<br>31<br>32<br>33<br>34<br>35    | Data sources/<br>measurement | 8* | For each variable of interest, give sources of data and details of methods of assessment (measurement). Describe comparability of assessment methods if there is more than one group                                                                                                                                                                                                                                                                                                                                                                                                                                                                                                                                     | 5-6 | Research assistant attached accelerometer to the child's waist in the preschool. The parents received written instructions about its use. During the seven days the children were wearing the accelerometers the parents filled in a diary .... |
| 36<br>37<br>38<br>39<br>40<br>41<br>42<br>43<br>44                            | Bias                         | 9  | Describe any efforts to address potential sources of bias                                                                                                                                                                                                                                                                                                                                                                                                                                                                                                                                                                                                                                                                | 5-8 | A major recruitment criterion was that there had to be at least one group of children aged 3-6 in the preschool. Eighty-six                                                                                                                     |



1  
2  
3  
4  
5  
6  
7  
8  
9  
10  
11  
12  
13  
14  
15  
16  
17  
18  
19  
20  
21  
22  
23  
24  
25  
26  
27  
28  
29  
30  
31  
32  
33  
34  
35  
36  
37  
38  
39  
40  
41  
42  
43  
44  
45  
46  
47

For peer review only

heads of preschools (56% participation rate) gave their written consent for participation in the study. Once the willingness of the preschools was ascertained information letters and consent forms were distributed to parents via the respective schools...

Study size 10 Explain how the study size was arrived at 6-8

Of the 864 participating children, 17 (2%) did not want to wear the accelerometer and 20 (2%) did not return the diary. In addition, two accelerometers were not installed properly and two were not returned. We therefore had data from 821 children (95% of the participants) to be used in forming the variables...

Continued on next page

|                        |    |                                                                                                                                                                                                                                                                                                           |        |                                                                                                                                                                                                                                                                                           |
|------------------------|----|-----------------------------------------------------------------------------------------------------------------------------------------------------------------------------------------------------------------------------------------------------------------------------------------------------------|--------|-------------------------------------------------------------------------------------------------------------------------------------------------------------------------------------------------------------------------------------------------------------------------------------------|
| Quantitative variables | 11 | Explain how quantitative variables were handled in the analyses. If applicable, describe which groupings were chosen and why                                                                                                                                                                              | 5-7    | The use of TV, computers, tablet computers, smartphones and DVD/Videos were combined into one variable, screen time. The weighted daily averages (5/7 on weekdays and 2/7 at weekends) of screen time and reading were calculated. No data on specific preschool-based SBs were collected |
| Statistical methods    | 12 | (a) Describe all statistical methods, including those used to control for confounding                                                                                                                                                                                                                     | 7      | The analyses were adjusted for municipality, the child's age and gender, and the season during which the accelerometer was used...                                                                                                                                                        |
|                        |    | (b) Describe any methods used to examine subgroups and interactions                                                                                                                                                                                                                                       |        |                                                                                                                                                                                                                                                                                           |
|                        |    | (c) Explain how missing data were addressed                                                                                                                                                                                                                                                               | 5, 7-8 | Four variables with different time criteria were formed to indicate different times of the week:...                                                                                                                                                                                       |
|                        |    | (d) <i>Cohort study</i> —If applicable, explain how loss to follow-up was addressed<br><i>Case-control study</i> —If applicable, explain how matching of cases and controls was addressed<br><i>Cross-sectional study</i> —If applicable, describe analytical methods taking account of sampling strategy | 8      | The non-independence of observations due to cluster sampling (children in the preschool groups) was taken into account in the analyses, and the highest SES group was treated as a reference category...                                                                                  |
|                        |    | (e) Describe any sensitivity analyses                                                                                                                                                                                                                                                                     |        |                                                                                                                                                                                                                                                                                           |

## Results

1  
2  
3  
4  
5  
6  
7  
8  
9  
10  
11  
12  
13  
14  
15  
16  
17  
18  
19  
20  
21  
22  
23  
24  
25  
26  
27  
28  
29  
30  
31  
32  
33  
34  
35  
36  
37  
38  
39  
40  
41  
42  
43  
44  
45  
46  
47

|                  |     |                                                                                                                                                                                                   |   |                                                                                                                                                                                                                                                                                                                         |
|------------------|-----|---------------------------------------------------------------------------------------------------------------------------------------------------------------------------------------------------|---|-------------------------------------------------------------------------------------------------------------------------------------------------------------------------------------------------------------------------------------------------------------------------------------------------------------------------|
| Participants     | 13* | (a) Report numbers of individuals at each stage of study—eg numbers potentially eligible, examined for eligibility, confirmed eligible, included in the study, completing follow-up, and analysed | 8 | Of the 864 participating children, 17 (2%) did not want to wear the accelerometer and 20 (2%) did not return the diary. In addition, two accelerometers were not installed properly and two were not returned. We therefore had data from 821 children (95% of the participants) to be used in forming the variables... |
|                  |     | (b) Give reasons for non-participation at each stage                                                                                                                                              |   |                                                                                                                                                                                                                                                                                                                         |
|                  |     | (c) Consider use of a flow diagram                                                                                                                                                                |   |                                                                                                                                                                                                                                                                                                                         |
| Descriptive data | 14* | (a) Give characteristics of study participants (eg demographic, clinical, social) and information on exposures and potential confounders                                                          | 9 | Table 1 Sample Characteristics in the Increased Health and Wellbeing in Preschool (DAGIS) study conducted between years 2015 and 2016 in Finland (N=864)                                                                                                                                                                |
|                  |     | (b) Indicate number of participants with missing data for each variable of interest                                                                                                               |   |                                                                                                                                                                                                                                                                                                                         |
|                  |     | (c) <i>Cohort study</i> —Summarise follow-up time (eg, average and total amount)                                                                                                                  |   |                                                                                                                                                                                                                                                                                                                         |
| Outcome data     | 15* | <i>Cohort study</i> —Report numbers of outcome events or summary measures over time                                                                                                               |   |                                                                                                                                                                                                                                                                                                                         |
|                  |     | <i>Case-control study</i> —Report numbers in each exposure category, or summary measures of exposure                                                                                              |   |                                                                                                                                                                                                                                                                                                                         |
|                  |     | <i>Cross-sectional study</i> —Report numbers of outcome events or summary measures                                                                                                                | 9 | Table 1 Sample Characteristics in the Increased Health and Wellbeing in Preschool (DAGIS) study conducted                                                                                                                                                                                                               |

|              |    |                                                                                                                                                                                                              |      |                                                                                                                                    |
|--------------|----|--------------------------------------------------------------------------------------------------------------------------------------------------------------------------------------------------------------|------|------------------------------------------------------------------------------------------------------------------------------------|
|              |    |                                                                                                                                                                                                              |      | between years 2015 and 2016 in Finland (N=864)                                                                                     |
| Main results | 16 | (a) Give unadjusted estimates and, if applicable, confounder-adjusted estimates and their precision (eg, 95% confidence interval). Make clear which confounders were adjusted for and why they were included | 9-12 | The analyses were adjusted for municipality, the child's age and gender, and the season during which the accelerometer was used... |
|              |    | (b) Report category boundaries when continuous variables were categorized                                                                                                                                    |      |                                                                                                                                    |
|              |    | (c) If relevant, consider translating estimates of relative risk into absolute risk for a meaningful time period                                                                                             |      |                                                                                                                                    |

Continued on next page

|                          |    |                                                                                                                                                                            |       |                                                                                                                                                                                             |
|--------------------------|----|----------------------------------------------------------------------------------------------------------------------------------------------------------------------------|-------|---------------------------------------------------------------------------------------------------------------------------------------------------------------------------------------------|
| Other analyses           | 17 | Report other analyses done—eg analyses of subgroups and interactions, and sensitivity analyses                                                                             |       |                                                                                                                                                                                             |
| <b>Discussion</b>        |    |                                                                                                                                                                            |       |                                                                                                                                                                                             |
| Key results              | 18 | Summarise key results with reference to study objectives                                                                                                                   | 12    | In sum...                                                                                                                                                                                   |
| Limitations              | 19 | Discuss limitations of the study, taking into account sources of potential bias or imprecision. Discuss both direction and magnitude of any potential bias                 | 15    | There are some limitations that should be taken into account in interpreting the results of our study. T                                                                                    |
| Interpretation           | 20 | Give a cautious overall interpretation of results considering objectives, limitations, multiplicity of analyses, results from similar studies, and other relevant evidence | 13-15 | The finding that reading and screen time had opposite relationships with parental SES attests to the necessity of measuring different types of SBs to fully understand the SES differences. |
| Generalisability         | 21 | Discuss the generalisability (external validity) of the study results                                                                                                      | 13-15 | that it encompasses a large sample, including children from 66 different preschools in various municipalities                                                                               |
| <b>Other information</b> |    |                                                                                                                                                                            |       |                                                                                                                                                                                             |
| Funding                  | 22 | Give the source of funding and the role of the funders for the present study and, if applicable, for the original study on which the present article is based              | 16    | This study was financially supported                                                                                                                                                        |

\*Give information separately for cases and controls in case-control studies and, if applicable, for exposed and unexposed groups in cohort and cross-sectional studies.

**Note:** An Explanation and Elaboration article discusses each checklist item and gives methodological background and published examples of transparent reporting. The STROBE checklist is best used in conjunction with this article (freely available on the Web sites of PLoS Medicine at <http://www.plosmedicine.org/>, Annals of Internal Medicine at <http://www.annals.org/>, and Epidemiology at <http://www.epidem.com/>). Information on the STROBE Initiative is available at [www.strobe-statement.org](http://www.strobe-statement.org).

1  
2  
3  
4  
5  
6  
7  
8  
9 ON THE BEHALF OF THE AUTHORS,

10  
11  Suvi Maalo  
12  
13  
14  
15  
16  
17  
18  
19  
20  
21  
22  
23  
24  
25  
26  
27  
28  
29  
30  
31  
32  
33  
34  
35  
36  
37  
38  
39  
40  
41  
42  
43  
44  
45  
46  
47

# BMJ Open

## Preschool children's context-specific sedentary behaviors and parental socioeconomic status in Finland: a cross-sectional study

|                                 |                                                                                                                                                                                                                                                                                                                                                                                                                                                                   |
|---------------------------------|-------------------------------------------------------------------------------------------------------------------------------------------------------------------------------------------------------------------------------------------------------------------------------------------------------------------------------------------------------------------------------------------------------------------------------------------------------------------|
| Journal:                        | <i>BMJ Open</i>                                                                                                                                                                                                                                                                                                                                                                                                                                                   |
| Manuscript ID                   | bmjopen-2017-016690.R1                                                                                                                                                                                                                                                                                                                                                                                                                                            |
| Article Type:                   | Research                                                                                                                                                                                                                                                                                                                                                                                                                                                          |
| Date Submitted by the Author:   | 28-Jul-2017                                                                                                                                                                                                                                                                                                                                                                                                                                                       |
| Complete List of Authors:       | Määttä , Suvi; Folkhälsan Research Center; University of Helsinki, Department of Social Research<br>Konttinen, Hanna; University of Helsinki, Department of Social Research<br>Haukkala, Ari; University of Helsinki, Department of Social Research<br>Erkkola, Maijaliisa; University of Helsinki, Department of Food and Environmental Sciences<br>Roos, Eva; Folkhälsan Research Centre; University of Helsinki, Department of Food and Environmental Sciences |
| <b>Primary Subject Heading</b>: | Public health                                                                                                                                                                                                                                                                                                                                                                                                                                                     |
| Secondary Subject Heading:      | Research methods                                                                                                                                                                                                                                                                                                                                                                                                                                                  |
| Keywords:                       | PUBLIC HEALTH, SOCIAL MEDICINE, EPIDEMIOLOGY                                                                                                                                                                                                                                                                                                                                                                                                                      |
|                                 |                                                                                                                                                                                                                                                                                                                                                                                                                                                                   |

SCHOLARONE™  
Manuscripts

only

1  
2  
3 Preschool children's context-specific sedentary behaviors and parental socioeconomic status  
4 in Finland: a cross-sectional study  
5  
6

7 Suvi Määttä <sup>1,2</sup> (suvi.maatta@folkhalsan.fi)  
8

9 Hanna Konttinen <sup>2</sup> (hanna.konttinen@helsinki.fi)  
10

11 Ari Haukkala <sup>2</sup> (ari.haukkala@helsinki.fi)  
12

13 Maijaliisa Erkkola <sup>3</sup> (majjaliisa.erkkola@helsinki.fi)  
14

15 Eva Roos <sup>1,3,4</sup> (eva.roos@folkhalsan.fi)  
16  
17  
18  
19

### 20 **Author affiliations**

21 <sup>1</sup> Folkhälsan Research Center, Helsinki, Finland  
22

23 <sup>2</sup> University of Helsinki, Department of Social Research, Helsinki, Finland.  
24

25 <sup>3</sup> University of Helsinki, Department of Food and Environmental Sciences, Helsinki, Finland  
26

27 <sup>4</sup> University of Helsinki, Clincum, Department of Public Health, Helsinki, Finland  
28  
29

### 30 **Corresponding author:**

31 Suvi Määttä  
32

33 Folkhälsan Research centre, Samfundet Folkhälsan  
34

35 Topeliuksenkatu 20  
36

37 00250 Helsinki, Finland  
38

39 [Suvi.maatta@folkhalsan.fi](mailto:Suvi.maatta@folkhalsan.fi)  
40  
41  
42

### 43 **Word count:**

44 4440  
45  
46  
47  
48  
49  
50  
51  
52  
53  
54  
55  
56  
57  
58  
59  
60



## Abstract

**Objectives:** This study examined the associations of parental socioeconomic status (SES) a) with preschoolers' objectively measured sedentary time (SED) over the course of a week, and b) with parent-reported children's screen and reading times at home as indicators of sedentary behaviors (SB).

**Design:** Cross-sectional.

**Setting:** In years 2015 and 2016 in Finland

**Participants:** 864 children, aged 3-6 years, with their parents.

**Outcome measures:** Children's accelerometer data were transformed into average SED minutes per hour in different contexts (preschool, home during preschool days, weekend and total). Parent-reported children's screen and reading times were expressed as average daily minutes. The SES indicators (maternal and paternal education and relative household income) were grouped into three categories. Linear or logistic regression analyses were used, with municipality, season, and children's gender and age as covariates. Confidence intervals were adjusted for clustering at the preschool-group level.

**Results:** Children with low maternal ( $\beta=17.21$ , 95% CI: 8.71, 25.71) and paternal ( $\beta=10.54$ , 95% CI: 0.77, 20.30) education had more overall screen time at home than their more advantaged counterparts. SES differences in overall screen time were mostly explained by TV viewing. Children with low as opposed to high maternal education ( $\beta=-2.66$ , 95% CI: -4.95, -0.38) had less reading time at home. Children whose fathers were on the middle ( $\beta=-1.15$ , 95% CI: -2.01, -0.29) educational level had less weekend ~~ST~~ SED than those with high paternal education. Otherwise, parental SES was not related to objectively measured ~~ST~~ SED.

**Conclusions:** The results of this study highlight the fact that the associations between parental SES and preschoolers' SB are dependent on the indicators of SES and SBs, and vary between different contexts. Generally, parental SES was not associated with SED, whereas some SES differences existed in screen time and reading time at home. Interventions aiming to diminish SES differences in children's SB should focus on home hours.

**Keywords:** sedentary lifestyle, preschool, children, socioeconomic factors

**Strengths and limitations of this study:**

- The major strength of this study is that sedentary behaviors were measured using parent-reported diary and accelerometer in a relative large sample of preschool children.
- The another strength of this study is that the associations between parental socioeconomic status and children's sedentary behaviors were studied in separate contexts (e.g. preschool time, weekend).
- The limitation of this study is that the hip-worn accelerometer may not effectively separate standing from sitting and reclining positions.
- The another limitation of this study is that the parent-reported diary may lead to bias in that parents might be unable to constantly monitor their children's behaviors

## INTRODUCTION

Children as young as preschool age (defined here as aged 3 through 6 years) spend most of their waking hours in sedentary behaviors (SB) [1], defined as set of activities characterized by low levels of energy expenditure and a sitting or reclining position [2]. The overall sedentary time (SED) can be broken up into separate (SB) – of which some are more harmful to health than others. The detrimental health effects of extensive screen-based SBs, especially TV viewing, on childhood obesity, other cardiometabolic risk markers, motor-skill development, psychosocial wellbeing and cognitive development are recognized in several studies focusing on early years (roughly ages 0-5) [3-6]. On the other hand, a recent review points out the beneficial effects of reading (or being read to) for cognitive development at preschool-age [3]. There are limited indications of associations between overall objectively measured SED and health indicators among preschool children, but clearer evidence on adverse health outcomes of extensive SED has been found among adults [7-9]. The SB habits formed at the preschool-age tend to maintain throughout life-course, and track over time predicting the future SB habits and health outcomes [10-13]. Given this tracking tendency of SBs together with high levels of SB among contemporary preschool children population [1, 14], understanding of the determinants of overall SED and specific SBs is relevant for health promotion strategies.

One important factor to be studied further is parental socioeconomic status (SES). A recent review concludes that a socioeconomic gradient for many predictors of obesity is established in early childhood, and health inequalities in early childhood predict poorer health later in life

1  
2  
3 [15]. Most previous studies focus on the associations between SES and preschoolers' TV  
4 viewing, and there is concurrent evidence that preschoolers with a low SES background tend  
5 to spend more time watching TV than their counterparts with a high SES [15-17]. However,  
6 there is very little evidence with inconsistent findings of the possible SES differences in  
7 preschoolers' objectively measured SED or in other specific SBs, such as reading and other  
8 screen-related SBs [15-18]. Other SBs are known to be major contributors to preschoolers'  
9 overall SED [19], and may have different associations with indicators of SES. Similarly,  
10 different indicators of SES (e.g. education and income) may have different associations with  
11 preschoolers' SBs.  
12

13  
14 Existing studies on preschool children also tend to concentrate on weekly average SBs  
15 without considering the possible differences over the course of the week (e.g. weekdays and  
16 at weekends) or in different settings (e.g. preschool or home). For example, there may be no  
17 SES differences in children's SBs during preschool time given that early educators  
18 predetermine most behaviors and allow little flexibility. During out-of-preschool hours (later  
19 referred as home hours), parents have more an important role for planning and deciding the  
20 activities for their children. Given that SES modifies parental attitudes, experiences, and  
21 exposures to different behaviors [20-22], the behavioral variation among children may be  
22 wider at home. The results of studies conducted among school-aged children suggest that  
23 overall SED is higher after school hours and during weekends [23, 24], hence it would be  
24 relevant to find out if there are also SES differences in SED. A previous study found that  
25 preschoolers' with higher maternal education had more SED in the evenings [25]. However,  
26 specific SBs were not observed in this study, which could explicate the SES differences in  
27 overall SED. This study examines the associations of parental SES a) with preschool  
28 children's objectively measured SED over the course of a week, and b) with preschool  
29 children's parent-reported overall screen time, screen-specific time (TV viewing, computer  
30 use, DVD/video watching and tablet computer/smartphone use) and reading time at home as  
31 indicators of their SBs.  
32  
33  
34  
35  
36  
37  
38  
39  
40  
41  
42  
43  
44  
45  
46  
47  
48

## 49 **METHODS**

### 50 **Study design**

51  
52 The DAGIS (Increased Health and Wellbeing in Preschools) study is a long-term project with  
53 multiple data-collection phases [26]. As part of this project a cross-sectional study was  
54 conducted between autumn 2015 and spring 2016, the aim being to investigate socioeconomic  
55 differences in children's energy-balance-related behaviors (EBRBs). It was a multiple-method  
56  
57  
58  
59  
60

1  
2  
3 study covering children, parents, and preschools. An ethical permit was obtained from the  
4 University of Helsinki Review Board in the Humanities and Social and Behavioral Sciences.  
5  
6

### 7 **Study population**

8  
9 The cross-sectional study was conducted in eight municipalities situated in Southern and  
10 Western Finland. Municipalities in Finland are responsible for organizing preschool services  
11 based on national guidelines. Each child has a subjective right to a preschool place, and 74  
12 percent of children aged 3-5 years are in preschool. About 76 percent of all children who are  
13 in preschools attend those organized by the municipality. [27] Only municipality-based  
14 preschools were randomly selected for the study. The main recruitment criterion for  
15 preschools was that there had to be at least one group of children aged 3-6 years in the  
16 preschool. The working language in preschool needed to be either Finnish or Swedish. We  
17 also excluded purely pre-primary education classes and preschools that are open for 24 hours  
18 a day.  
19  
20  
21  
22  
23  
24

25  
26 Eighty-six heads of preschools (56% participation rate) gave their written consent for  
27 participation in the study. Once the willingness of the preschools was ascertained information  
28 letters and consent forms were distributed to parents via the respective schools. The main  
29 parental recruitment criterion was to have at least one child aged 3-6 years attending  
30 preschool regularly. Parents of 983 children (27% consent rate) gave their written consent for  
31 the study. Given the recruitment criterion of including only preschools with more than a 30-  
32 percent consent rate in at least one of the groups, the survey was conducted in 66 preschools,  
33 among a total of 892 children whose parents had consented to their participation. However, no  
34 research data were available on 28 children, hence the final total was 864 children (24% of  
35 those invited).  
36  
37  
38  
39  
40  
41  
42

## 43 **MEASURES**

### 44 **Indicators of sedentary behaviors**

45  
46 Children wore an Actigraph W-GT3X accelerometer (Actigraph, Pensacola, Florida) on the  
47 hip 24 hours a day for seven days. Actigraph has been validated and used extensively as an  
48 objective measure of physical activity (PA) and SED [28-30]. Research assistant attached  
49 accelerometer to the child's waist in the preschool. The parents received written instructions  
50 about its use. During the seven days the children were wearing the accelerometers the parents  
51 filled in a diary in which they reported their child's sleeping hours and preschool hours, non-  
52 wearing times of the accelerometer, and possible sickness days.  
53  
54  
55  
56  
57  
58  
59  
60

1  
2  
3 The epoch length was set at 15 seconds. Periods of 10 minutes or more at zero accelerometer  
4 counts were considered to be non-wearing times, and were excluded. The Evenson SED cut-  
5 point with vertical axis ( $\leq 100$  counts per minute) was applied [31], having been shown to be  
6 a good estimate of free-living SED [32, 33]. Hours of night sleeping and reported sickness  
7 days were excluded from the analyses. Four variables with different time criteria were formed  
8 to indicate different times of the week: a) total SED time (at least 600 minutes per day, for at  
9 least four days with one weekend-day); b) preschool SED (at least 240 minutes per day, for at  
10 least two days); c) home SED during preschool days (the same days as used in the preschool  
11 variable); d) weekend SED (at least 600 minutes per day). All these variables were adjusted  
12 for the wearing hours so as to indicate the children's SED minutes in an average hour in  
13 different contexts. The presented time criteria were based on previous studies that have  
14 estimated the wearing hours and days that best illustrate preschoolers' habitual SED and PA  
15 during a whole measurement week, or in separate contexts [34-36].

16  
17  
18 The above-mentioned diary included a daily report on the children's SBs that was based on  
19 previously validated method [37]. Of the original method, only the SB section was retained.  
20 We made some modifications to the original version, asking separately about TV watching  
21 and DVD/video watching, and we added the use of tablet computers and smartphones as an  
22 option (please, see the supplementary material 1). The parents were asked to state in the diary  
23 whether their child carried out any of the listed activities while sitting down or being still.  
24 They reported daily on whether the child engaged in a certain activity, how many times and  
25 for how many hours and minutes in total. They were also asked to consider only the time  
26 periods outside preschool hours. We used the following activities from the diary in the present  
27 study: reading or looking at a book (later called reading), TV viewing watching, DVD/video  
28 watching, computer use, tablet computer and smartphone use. The reported hours and minutes  
29 devoted to these activities were transformed into minutes. The weighted daily averages (5/7  
30 on weekdays and 2/7 at weekends) of TV viewing, DVD/video watching, computer use, tablet  
31 computer/smartphone use and reading were calculated. The use of TV, computers, tablet  
32 computers, smartphones and DVD/Videos were combined into one variable, screen time, as  
33 well as analyzed separately. No data on specific preschool-based SBs were collected.

### 52 **Indicators of socioeconomic status**

53  
54 The educational level of both parents was reported in the consent form: they were asked to  
55 rank their highest educational attainment on a seven-item list. The response options were re-  
56 organized into three groups: a low education was defined as comprehensive schooling  
57  
58  
59  
60

1  
2  
3 (usually from ages 7 to 16) to secondary education (usually ages 16 to 19); a medium level  
4 refers to a Bachelor's degree; and a high education as at least a Master's Degree.

5  
6  
7 Household income was elicited in the parental questionnaire. The parents were asked to report  
8 the extent of the entire household net income (after tax) on average per month, taking into  
9 account any regular income after tax such as earnings and capital gains, pensions, child  
10 benefits and other social benefits. The response options ranged from less than 500 (1), to over  
11 10,000 (10) Euros per month. The total household net income was divided by the number of  
12 family members using a standard equivalence scale that gave a weight to all members of the  
13 household [38]. This relative household-income variable was categorized into tertiles. Low-  
14 income families had a monthly-equalized income of less than 1,894 Euros, and high-income  
15 families an income of 2,501 Euros or more.  
16  
17

### 18 19 20 21 22 **Covariates**

23  
24 The analyses were adjusted for municipality, the child's age and gender, and the season  
25 during which the accelerometer was used. Parents reported the child's age and gender. Age  
26 was treated as continuous variable in the analyses. The season variable was divided into three  
27 categories: 1=September-October, 2= November-December, and 3=January-April. Both the  
28 season and the municipality variables were treated as dummy variables.  
29  
30  
31

### 32 33 **Statistical analyses**

34 The SPSS version 23 (SPSS Inc., Chicago, IL, USA) was used to derive the descriptive  
35 statistics. Screen time (N=4) and home SED (N=1) had outliers beyond three standard  
36 deviations of the mean, and were thus removed from the analyses.  
37  
38

39  
40 Linear regression analyses were conducted to examine the associations between the SES  
41 indicators and each SB SED variable, overall screen time, and reading time. Logistic  
42 regression analyses were conducted to examine the associations between the SES indicators  
43 and TV viewing, DVD/video watching, computer use and tablet computer/smart phone use.  
44 These four variables were dichotomized for logistic regression analyses so that children with  
45 highest 25 percent of using/viewing time were compared to other children. Mplus Version  
46 7.4. (Muthen & Muthen, Los Angeles, CA, USA) with Maximum Likelihood Estimation and  
47 Robust Standard Errors (MLR) was used to perform linear and logistic regression analyses.  
48 The non-independence of observations due to cluster sampling (children in the preschool  
49 groups) was taken into account in the analyses, and the highest SES group was treated as a  
50 reference category.  
51  
52  
53  
54  
55  
56  
57  
58  
59  
60

## RESULTS

Of the 864 participating children, 17 (2%) did not want to wear the accelerometer and 20 (2%) did not return the diary. In addition, two accelerometers were not installed properly and two were not returned. We therefore had data from 821 children (95% of the participants) to be used in forming the variables. In accordance with the criteria presented above, between 772 and 789 children had produced the required amount of accelerometer data for the analyses. Those who did not produce valid accelerometer data for total time and weekend SED were more likely to have a mother with a lower level of education than those who produced valid accelerometer data (data not shown). The overall average of daily wearing time was 773 minutes. A total of 771 parents filled in the diary properly. There were no differences in SES indicators between those who produced valid or invalid diary data. Parent-reported daily screen time correlated positively with objectively measured home SED ( $r=0.95$ ,  $P=0.010$ ) and with weekend SED ( $r=0.92$ ,  $P=0.013$ ), but negatively with preschool SED ( $r=-0.14$ ,  $P<0.001$ ). Reading did not correlate with any other outcomes. TV viewing correlated with preschool SED ( $r=-.08$ ,  $P=0.05$ ), weekend SED ( $r=.13$ ,  $P=0.001$ ), and total SED ( $r=.08$ ,  $P=0.05$ ). Tablet computer/smartphone use correlated with preschool SED ( $r=-.14$ ,  $P<0.001$ ), home SED ( $r=.17$ ,  $P<0.001$ ), weekend SED ( $r=.14$ ,  $P<0.001$ ), and total SED ( $r=.08$ ,  $P=.05$ ). Maternal education correlated with paternal education ( $r=0.49$ ,  $P<0.001$ ) and relative household income ( $r=0.31$ ,  $P<0.001$ ), and paternal education correlated with relative household income ( $r=0.32$ ,  $P<0.001$ ). Sample characteristics of the participants are described in Table 1.

Table 1 Sample Characteristics in the Increased Health and Wellbeing in Preschool (DAGIS) study conducted between years 2015 and 2016 in Finland (N=864)

| Measure                                                            | Value <sup>1</sup> | N   |
|--------------------------------------------------------------------|--------------------|-----|
| Children's age                                                     | 4.73 (.89)         | 864 |
| Children's gender                                                  |                    |     |
| Girls                                                              | 48%                | 413 |
| Boys                                                               | 52%                | 450 |
| Season during which the accelerometer was worn                     |                    |     |
| September-October                                                  | 44%                | 354 |
| November-December                                                  | 36%                | 290 |
| January-April                                                      | 20%                | 164 |
| Maternal education                                                 |                    |     |
| Low (1)                                                            | 30%                | 265 |
| Medium (2)                                                         | 41%                | 358 |
| High (3)                                                           | 29%                | 256 |
| Paternal education                                                 |                    |     |
| Low (1)                                                            | 45%                | 365 |
| Medium (2)                                                         | 33%                | 267 |
| High (3)                                                           | 22%                | 181 |
| Household income                                                   |                    |     |
| Low (1)                                                            | 32%                | 224 |
| Medium (2)                                                         | 34%                | 232 |
| High (3)                                                           | 34%                | 235 |
| Children's sedentary time measured by the accelerometer (min/hour) |                    |     |
| Total time                                                         | 28.11 (4.01)       | 772 |
| Preschool                                                          | 26.47 (5.11)       | 778 |
| Home time in preschool days                                        | 29.74 (4.96)       | 777 |
| Weekend                                                            | 28.47 (4.76)       | 779 |
| Children's sedentary time                                          |                    |     |



1  
2  
3 measured in the diary  
4 (min/day)

|    |              |                |     |
|----|--------------|----------------|-----|
| 5  |              |                |     |
| 6  | Screen time  | 111.02 (48.50) | 767 |
| 7  | TV viewing   | 56.14 (28.20)  | 771 |
| 8  | Computer use | 9.06 (20.32)   | 771 |
| 9  | Tablet/smart | 21.82 (26.18)  | 771 |
| 10 | phone use    |                |     |
| 11 | DVD/video    | 25.66 (30.50)  | 771 |
| 12 | watching     |                |     |
| 13 | Reading      | 19.19 (11.35)  | 765 |

14  
15  
16  
17  
18 <sup>1</sup> Values are mean (Standard Deviation) unless otherwise stated. N=864  
19

20  
21  
22 Table 2 presents the results on the associations of maternal education, paternal education, and  
23 relative household income with objectively measured preschool children's SED in different  
24 contexts. According to the findings, children whose fathers had a medium as opposed to a  
25 high level of education had, on average, 1.2 minutes ( 95% CI: -2.01, -0.29) less weekend  
26 SED per hour.  
27  
28  
29  
30  
31  
32  
33  
34  
35  
36  
37  
38  
39  
40  
41  
42  
43  
44  
45  
46  
47  
48  
49  
50  
51  
52  
53  
54  
55  
56  
57  
58  
59  
60

Table 2. The associations between parental socioeconomic status and preschool children's objectively measured sedentary time (minutes/hour) over the course of the week measured by means of linear regression models, adjusted for municipality, season, and the children's gender and age in the Increased Health and Wellbeing in Preschool (DAGIS) study conducted between years 2015 and 2016 in Finland

| Socioeconomic status<br>Indicator        | Sedentary time in preschool |                 |                  | Home sedentary time in<br>preschool days |                     |                  | Sedentary time in weekends |                 |                  | Total<br>sedentary time |                 |                  |
|------------------------------------------|-----------------------------|-----------------|------------------|------------------------------------------|---------------------|------------------|----------------------------|-----------------|------------------|-------------------------|-----------------|------------------|
|                                          | $\beta$                     | Lower<br>95% CI | Higher<br>95% CI | B                                        | Lower<br>95 %<br>CI | Higher<br>95% CI | $\beta$                    | Lower<br>95% CI | Higher<br>95% CI | $\beta$                 | Lower<br>95% CI | Higher<br>95% CI |
| Maternal education (N between 738 – 744) |                             |                 |                  |                                          |                     |                  |                            |                 |                  |                         |                 |                  |
| Low                                      | 0.46                        | -0.45           | 1.36             | 0.47                                     | -0.53               | 1.47             | -0.09                      | -0.71           | 0.90             | 0.33                    | -0.35           | 1.00             |
| Medium                                   | -0.53                       | -1.37           | 0.31             | 0.44                                     | -0.28               | 1.17             | -0.17                      | -0.94           | 0.59             | -0.22                   | -0.83           | 0.40             |
| High (reference)                         |                             |                 |                  |                                          |                     |                  |                            |                 |                  |                         |                 |                  |
| Paternal education (N between 682 – 691) |                             |                 |                  |                                          |                     |                  |                            |                 |                  |                         |                 |                  |
| Low                                      | -0.17                       | -1.14           | 0.79             | 0.05                                     | -0.86               | 0.96             | -0.49                      | -1.25           | 0.27             | -0.02                   | -0.68           | 0.63             |
| Medium                                   | -0.28                       | -1.28           | 0.72             | 0.10                                     | -0.78               | 0.99             | -1.15                      | -2.01           | -0.29            | -0.46                   | -1.10           | 0.18             |
| High (reference)                         |                             |                 |                  |                                          |                     |                  |                            |                 |                  |                         |                 |                  |
| Household income (N between 639 – 646)   |                             |                 |                  |                                          |                     |                  |                            |                 |                  |                         |                 |                  |
| Low                                      | 0.47                        | -0.34           | 1.28             | -0.85                                    | -1.76               | 0.06             | -0.52                      | -1.27           | 0.24             | -0.11                   | -0.74           | 0.51             |
| Medium                                   | -0.34                       | -1.16           | 0.49             | -0.22                                    | -0.99               | 0.54             | -0.05                      | -0.83           | 0.73             | -0.13                   | -0.69           | 0.44             |
| High (reference)                         |                             |                 |                  |                                          |                     |                  |                            |                 |                  |                         |                 |                  |

1  
2  
3  
4  
5 Table 3 presents the results on the associations of maternal education, paternal education, and  
6 relative household income with their children's daily overall screen time and reading time at  
7 home. Compared to children whose mothers had a high level of education, those with a low or  
8 a medium level of maternal education had, respectively and on average, 17.21 (95% CI: 8.71,  
9 25.71) and 11.17 ( 95% CI: 3.69, 18.64) minutes more screen time daily. Children whose  
10 fathers had a low level of education had 10.54 (95% CI: 0.77, 20.30) minutes more screen  
11 time than their counterparts with high paternal education. Children whose mothers had a low  
12 level of education had, on average, 2.66 (95% CI: -4.95, -0.38) minutes less reading time  
13 daily than their counterparts with high maternal education.  
14  
15  
16  
17  
18  
19  
20  
21  
22  
23  
24  
25  
26  
27  
28  
29  
30  
31  
32  
33  
34  
35  
36  
37  
38  
39  
40  
41  
42  
43  
44  
45  
46  
47  
48  
49  
50  
51  
52  
53  
54  
55  
56  
57  
58  
59  
60

Table 3. The associations between parental socioeconomic status and preschool children's daily average screen and reading time at home measured by means of linear regression analysis, and adjusted for municipality, season, and the children's gender and age in the Increased Health and Wellbeing in Preschool (DAGIS) study conducted between years 2015 and 2016 in Finland

| Socioeconomic status<br>Indicator        | Daily screen time at home (min/day) |                 |                  | Daily reading time at home (min/day) |                 |                  |
|------------------------------------------|-------------------------------------|-----------------|------------------|--------------------------------------|-----------------|------------------|
|                                          | $\beta$                             | Lower<br>95% CI | Higher<br>95% CI | $\beta$                              | Lower<br>95% CI | Higher<br>95% CI |
| Maternal education (N between 726 – 728) |                                     |                 |                  |                                      |                 |                  |
| Low                                      | 17.21                               | 8.71            | 25.71            | -2.66                                | -4.95           | -0.38            |
| Medium                                   | 11.17                               | 3.69            | 18.64            | -1.82                                | -3.79           | 0.15             |
| High (reference)                         |                                     |                 |                  |                                      |                 |                  |
| Paternal education (N between 674 – 676) |                                     |                 |                  |                                      |                 |                  |
| Low                                      | 10.54                               | 0.77            | 20.30            | -2.31                                | -4.85           | 0.23             |
| Medium                                   | -1.17                               | -11.07          | 8.74             | -1.66                                | -4.32           | 0.99             |
| High (reference)                         |                                     |                 |                  |                                      |                 |                  |
| Household income (N=628)                 |                                     |                 |                  |                                      |                 |                  |
| Low                                      | 9.82                                | -0.13           | 19.78            | -1.34                                | -3.60           | 0.92             |
| Medium                                   | 6.60                                | -2.41           | 15.60            | 0.14                                 | -2.07           | 2.34             |
| High (reference)                         |                                     |                 |                  |                                      |                 |                  |

1  
2  
3 Table 4 presents the results on the associations of maternal education, paternal education, and  
4 relative household income with their children's TV viewing, computer use, DVD/video  
5 watching, and smartphone/tablet computer use. Compared to children whose mothers had a  
6 high level of education, those with a low or middle level of maternal education had a  
7 significantly increased risk of viewing TV over 72 minutes per day with the highest risk in the  
8 group with the lowest educated mothers (OR in low educated group: 2.59, 95% CI 1.58, 4.26;  
9 OR in middle educated group: 2.00, 95% CI 1.22, 3.27). Children whose fathers had a low  
10 level of education had an increased risk of viewing TV over 72 minutes day (OR: 1.96, 95%  
11 CI 1.21, 3.15) compared to their counterparts with a high paternal education. Compared to  
12 children who had a high level of household income, those with a low or middle level of  
13 household income had an elevated risk of viewing TV over 72 minutes per day with the  
14 highest risk in the group with the lowest income (OR in the low income group: 1.74, 95% CI:  
15 1.05, 2.87; OR in the middle income group: 1.64, 95% CI 1.00, 2.69).

16  
17  
18 Finally, children whose family had a middle level of household income had a higher risk of  
19 watching DVD/videos over 44 minutes per day (OR: 1.68, 95% CI: 1.05, 2.68) and a lower  
20 risk of using tablet computers/smartphones over 33 minutes per day (OR: 0.53, 95% CI: 0.33,  
21 0.84) compared to their counterparts with a high household income.  
22  
23  
24  
25  
26  
27  
28  
29  
30  
31  
32  
33  
34  
35  
36  
37  
38  
39  
40  
41  
42  
43  
44  
45  
46  
47  
48  
49  
50  
51  
52  
53  
54  
55  
56  
57  
58  
59  
60

Table 4. The associations between parental socioeconomic status and preschool children’s daily average TV viewing, computer use, DVD/video watching and smartphone/tablet computer use measured by means of logistic regression analysis, and adjusted for municipality, season, and the children’s gender and age in the Increased Health and Wellbeing in Preschool (DAGIS) study conducted between years 2015 and 2016 in Finland <sup>1</sup>

| Socioeconomic status        | TV viewing at home (over 72 minutes per day) <sup>2</sup> |      |              | Computer use at home (over 1 minute per day) <sup>2</sup> |      |              | DVD/video watching at home (over 44 minutes per day) <sup>2</sup> |      |              | Smartphone/tablet computer use (over 33 minutes per day) <sup>2</sup> |      |              |
|-----------------------------|-----------------------------------------------------------|------|--------------|-----------------------------------------------------------|------|--------------|-------------------------------------------------------------------|------|--------------|-----------------------------------------------------------------------|------|--------------|
|                             | Indicator                                                 | OR   | Lower 95% CI | Higher 95% CI                                             | OR   | Lower 95% CI | Higher 95% CI                                                     | OR   | Lower 95% CI | Higher 95% CI                                                         | OR   | Lower 95% CI |
| Maternal education (N =731) |                                                           |      |              |                                                           |      |              |                                                                   |      |              |                                                                       |      |              |
| Low                         | 2.59                                                      | 1.58 | 4.26         | 1.14                                                      | 0.77 | 1.68         | 1.12                                                              | 0.68 | 1.84         | 0.98                                                                  | 0.61 | 1.59         |
| Medium                      | 2.00                                                      | 1.22 | 3.27         | 0.67                                                      | 0.45 | 1.02         | 1.27                                                              | 0.80 | 2.00         | 1.38                                                                  | 0.92 | 2.06         |
| High (reference)            |                                                           |      |              |                                                           |      |              |                                                                   |      |              |                                                                       |      |              |
| Paternal education (N= 679) |                                                           |      |              |                                                           |      |              |                                                                   |      |              |                                                                       |      |              |
| Low                         | 1.96                                                      | 1.21 | 3.15         | 1.19                                                      | 0.80 | 1.78         | 0.97                                                              | 0.60 | 1.58         | 0.79                                                                  | 0.49 | 1.26         |
| Medium                      | 1.13                                                      | 0.67 | 1.90         | 1.02                                                      | 0.64 | 1.63         | 0.70                                                              | 0.42 | 1.16         | 1.00                                                                  | 0.63 | 1.58         |
| High (reference)            |                                                           |      |              |                                                           |      |              |                                                                   |      |              |                                                                       |      |              |
| Household income (N=630)    |                                                           |      |              |                                                           |      |              |                                                                   |      |              |                                                                       |      |              |
| Low                         | 1.74                                                      | 1.05 | 2.87         | 1.31                                                      | 0.87 | 1.97         | 1.52                                                              | 0.93 | 2.50         | 0.71                                                                  | 0.43 | 1.18         |
| Medium                      | 1.64                                                      | 1.00 | 2.69         | 1.23                                                      | 0.79 | 1.92         | 1.68                                                              | 1.05 | 2.68         | 0.53                                                                  | 0.33 | 0.84         |
| High (reference)            |                                                           |      |              |                                                           |      |              |                                                                   |      |              |                                                                       |      |              |

<sup>1</sup> Values are odds ratios (95% confidence intervals)

<sup>2</sup> The highest 25% of parental reported children’s screen-specific time in minutes per day (1) was compared to others

## DISCUSSION

The main findings of this study show that children with low parental education had more overall screen time at home than their counterparts with highly educated parents, whereas those whose mothers had a higher as opposed to a lower level of education had more reading time. Screen-specific (TV viewing, DVD/video watching, computer use and tablet computer/smartphone use) analyses indicated that SES differences in overall screen time were mostly explained by TV viewing. Otherwise, parental SES was mainly unrelated to the children's objectively measured SED over the course of the week.

In our study, preschoolers with lower parental education had between 10 (paternal education) and 17 (maternal education) minutes more daily screen time at home than their counterparts with higher parental education. Especially, the children with lower SES backgrounds had an increased risk of viewing TV over 72 minutes per day, compared to children with higher SES backgrounds. Our results support therefore findings of other studies that conclude preschool children with low SES backgrounds tend to have higher risks to exceed the screen time recommendations [39-41]. However, a recent meta-analysis reports that the associations of SES and children's SB are dependent on the country so that SES is inversely associated especially with screen time and TV viewing time in high-income countries whereas SES is positively associated with 'other' screen time such as computers and videos in low-middle-income countries [42]. The clinical relevance of a 10 to 17 minutes educational difference in screen time at home requires further evaluation. The result, however, has public health importance when developing the strategies to diminishing socioeconomic gradient in preschool children's screen time.

Different types of screens have become part of everyday life in families with preschoolers, and controlling screen use may be difficult for parents. Higher as opposed to lower parental education is usually related to enhanced awareness, capabilities and skills in terms of adopting a healthy lifestyle [21]. Screen-time reduction may require additional resources (e.g. financial, time) that parents are not necessarily able to provide, which in turn could add to parental stress [43, 44]. Stress in combination with a lack of resources might make it challenging for parents with a low educational level to limit screen time among their children. Previous studies suggest that parents with lower SES backgrounds have less rules related to TV viewing, allow TV viewing more often, and view TV together with their child more frequently [22, 44, 45]. Other studies suggest that in general, parents might have strict screen

1  
2  
3 time rules for their children, but parents who are high screen users themselves more often fail  
4 to follow these rules and have joint screen time more frequently [46-50]. Parental rules and  
5 restrictions around children's screen time may therefore be important factor to focus in future  
6 interventions aiming to diminish SES gradient in children's screen time. Another potential  
7 factor may be the parental perceptions of suitable screen time for children [51], although  
8 possible SES differences in parental perceptions is less clear. The tighter norm for suitable  
9 children's screen time could mean tighter rules and restrictions around children's screen time.  
10 However, parental perceptions of the suitable amount of screen time as intervention strategy  
11 has not previously been used in interventions focusing on preschool children's screen  
12 time[52], although successful changes have been achieved in other health behavior  
13 interventions focusing on changing norms[53]. More study is anyhow needed to explore the  
14 potential factors acting as mediators in the associations between parental SES and children's  
15 screen time. Such information may help target and design more effective family-based  
16 interventions aiming to diminish socioeconomic gradient in children's screen time.

17  
18  
19  
20  
21  
22  
23  
24  
25  
26  
27 Parents seem to value optimal cognitive development during early childhood [54]. Previous  
28 studies have illustrated that parents of preschool-aged children consider screen-time activities  
29 to be good educational tools, whereas the detrimental effects of extensive screen time on  
30 cognitive development is not mentioned [55-58]. These studies have not taken possible SES  
31 differences into consideration. Parents with a higher level of education might realize the  
32 harmful health effects of increased screen time and place more value on their children's  
33 educational achievements, and therefore encourage them to spend more time with books  
34 instead of watching a screen. It may be that parents with a low educational background do not  
35 realize the detrimental effects of screen time on cognitive development, and place more value  
36 on the educational aspects. Still, it should be acknowledged that some aspects of screen time  
37 could be educational. Applications in touch-screen devices such as tablet computers and smart  
38 phones are being used to an increasing extent as learning tools in preschools, for example.  
39 However, there is little current research about the real educational benefits of using these tools  
40 [59]. The results of some studies suggest that the use of touch-screen devices inhibits social  
41 interaction and children's ability to self-regulate their behavior, although benefits related to  
42 early literacy skills, the stimulation of concentration and the fostering of independent learning  
43 are also acknowledged [59]. Nevertheless, screen time is usually sedentary in nature, and it is  
44 therefore important to limit its use.



1  
2  
3 The finding that reading and screen time had opposite relationships with parental SES attests  
4 to the necessity of measuring different types of SBs to fully understand the SES differences.  
5 SES differences in reading time in early childhood are seldom addressed in SB studies, for  
6 example, although its beneficial influences on cognitive development and school readiness are  
7 recognized [3, 60]. These contradictory SES associations with different types of SBs could  
8 also partly explain the few associations between overall objectively measured SED and  
9 indicators of SES found in this study. It would therefore be relevant to consider whether it  
10 might be more worthwhile focusing on the type of SB than overall SED in research on SES  
11 differences in children's SB. Similarly, the wide variation of screens currently available  
12 ensures variation in the way they are used. Tablet computers and mobile devices are used not  
13 only as behavioral-control tools to calm down or distract children in restaurants and cars, but  
14 also for educational purposes [43, 59, 61]. It may be worth considering the context in which  
15 the devices are used in future studies, as well as potential SES differences in the way they are  
16 used.  
17

18  
19 We did not find any SES differences in SED during preschool hours: to our knowledge, no  
20 other studies have addressed this issue. However, our finding is inconsistent with a previous  
21 study on school-aged children reporting that offspring with parents educated to university  
22 level or higher had less SED in schools than children with less highly educated parents [62].  
23 The school setting with its compulsory lessons is different than the preschool setting,  
24 however. The Finnish preschool model is based on learning by playing, and compulsory pre-  
25 primary education in preparation for official schooling starts at the age of six [63]. We  
26 excluded pre-primary education classes during the recruitment phase of the DAGIS study.  
27 However, we did not measure children's specific SBs during preschool hours in more detail:  
28 we thought it would be too time-consuming to list specific SBs in diaries for each child in the  
29 preschool group. According to our preparatory work before we conducted this cross-sectional  
30 survey, the availability of screens in Finnish preschools is limited [64]. More research is  
31 therefore needed to shed light on the role of preschools in balancing SES differences in  
32 children's SB. Future studies could compare the associations between SES and SB among  
33 children who are attending preschool and those who are mainly cared for at home, for  
34 example.  
35

36  
37 There are some limitations that should be taken into account in interpreting the results of our  
38 study. The DAGIS study is cross-sectional, and therefore the causality between parental SES  
39 and children's SB cannot be fully established. The participation rate of families was low,  
40  
41  
42  
43  
44  
45  
46  
47  
48  
49  
50  
51  
52  
53  
54  
55  
56  
57  
58  
59  
60

1  
2  
3 which may influence the generalizability of our findings. It might be that a selected sample of  
4 participants from preschools participated in this study. Similarly, children who did not  
5 produce valid accelerometer data for total time (6 %) and weekend SED (5 %) were more  
6 likely to have a mother with a lower level of education suggesting that included children are  
7 not representative of the overall study population. There are several accelerometer cut-points  
8 for SED among preschool children, and there is no consensus as to which are the most  
9 suitable. However, the results of ~~a recent comparative study~~ a comparative study among 4-6  
10 years old children support the choice of Evenson cut-points for measuring SED [28].  
11 Moreover, the hip-worn accelerometer might not give the most accurate measurements  
12 because it does not effectively separate standing from sitting and reclining positions [32].  
13 The information on children's screen time and reading was based on parental reports, and as  
14 with any other reported information, proxy reports may lead to bias in that parents might be  
15 unable to constantly monitor their children's behaviors [65, 66]. In addition, parents might  
16 have under- or over-reported in socially desirable manner the children's screen time and  
17 reading time. Nevertheless, the diary is generally considered to be more reliable than a few  
18 items in a questionnaire [67]. A major strength of this study is that it encompasses a large  
19 sample, including children from 66 different preschools in various municipalities. Another  
20 strength is that we measured the preschoolers' overall SED and specific SBs, and used several  
21 SES indicators. We also separated the different times of the week from the accelerometer  
22 data. We therefore contributed new information on how parental SES influences engagement  
23 in specific SBs and SED in different contexts. These novel data will be useful for future  
24 interventions focusing on diminishing preschoolers' SBs.

## 40 Conclusion

41 The most consistent finding from this study is that overall daily screen time at home is higher  
42 among children with a low parental-educational background even at preschool age. It would  
43 therefore be valuable to develop strategies aimed at diminishing screen time at home among  
44 these children. The findings exemplify the multidimensionality of the relationship between  
45 preschoolers' SBs and parental SES. Including multiple measurements of SBs and several  
46 indicators of parental SES, and taking into account the different contexts over the course of a  
47 week (e.g. preschool, weekend) would deepen understanding of the association between SES  
48 and preschoolers' SB.  
49  
50  
51  
52  
53  
54  
55  
56  
57  
58  
59  
60

1  
2  
3 **Acknowledgements:** The authors thank the preschools and their personnel, and the parents  
4 for their participation in the DAGIS study, and the staff for the data collection.  
5

6 **Authors' contributions:** SM drafted the manuscript and conducted the analyses of this study.  
7 HK helped in conducting the analyses and drafting the manuscript. ME, AH and ER helped in  
8 drafting the manuscript. SM, ME and ER were involved in the design of the study and in  
9 seeking funding for it. ER was the principal investigator of the DAGIS study and was  
10 responsible for the study conduct. All authors revised the article critically for important  
11 intellectual content and approved the final manuscript.  
12  
13  
14  
15  
16

17  
18 **Funding statement:** This study was financially supported by the Folkhälsan Research Center,  
19 The Ministry of Education and Culture in Finland, The Academy of Finland (Grant: 285439),  
20 The Juho Vainio Foundation, The Yrjö Jahnsson Foundation, the Signe and Ane Gyllenberg  
21 Foundation, The Finnish Cultural Foundation/South Ostrobothnia Regional Fund, the Päivikki  
22 and Sakari Sohlberg foundation, and the Medicinska Föreningen Liv och Hälsa.  
23  
24  
25  
26  
27

28 **Conflicts of interest:** none  
29

30 **Ethics approval:** the University of Helsinki Review Board in the Humanities and Social and  
31 Behavioral Sciences  
32

33 **Data sharing statement:** Researchers interested in the data from this study may contact  
34 principal investigator Eva Roos, [eva.roos@folkhalsan.fi](mailto:eva.roos@folkhalsan.fi).  
35  
36  
37

## 38 REFERENCES:

39  
40  
41  
42 1 Verloigne M, Loyen A, Van Hecke L, et al. Variation in population levels of sedentary time  
43 in European children and adolescents according to cross-European studies: a systematic  
44 literature review within DEDIPAC, *Int J Behav Nutr Phys Act* 2016;13:69,016-0395-5.  
45

46 2 Sedentary Behaviour Research Network. Letter to the editor: standardized use of the terms  
47 "sedentary" and "sedentary behaviours", *Applied Physiology, Nutrition, and Metabolism*  
48 2012;37:540-2.  
49

50  
51 3 Carson V, Kuzik N, Hunter S, et al. Systematic review of sedentary behavior and cognitive  
52 development in early childhood, *Prev Med* 2015;78:115-22.  
53

54 4 de Rezende LF, Rodrigues Lopes M, Rey-Lopez JP, et al. Sedentary behavior and health  
55 outcomes: an overview of systematic reviews, *PLoS One* 2014;9:e105620.  
56  
57  
58  
59  
60

- 1  
2  
3 5 Hinkley T, Teychenne M, Downing K, et al. Early childhood physical activity, sedentary  
4 behaviors and psychosocial well-being: a systematic review, *Preventive medicine*  
5 2014;62:182-92.  
6
- 7 6 LeBlanc AG, Spence JC, Carson V, et al. Systematic review of sedentary behaviour and  
8 health indicators in the early years (aged 0-4 years), *Appl Physiol Nutr Metab* 2012;37:753-  
9 72.  
10
- 11 7 Cliff DP, Hesketh KD, Vella SA, et al. Objectively measured sedentary behaviour and  
12 health and development in children and adolescents: systematic review and meta-analysis,  
13 *Obes Rev* 2016;17:330-44.  
14
- 15 8 van Ekris E, Altenburg TM, Singh AS, et al. An evidence-update on the prospective  
16 relationship between childhood sedentary behaviour and biomedical health indicators: a  
17 systematic review and meta-analysis, *Obes Rev* 2016.  
18
- 19 9 Wilmot EG, Edwardson CL, Achana FA, et al. Sedentary time in adults and the association  
20 with diabetes, cardiovascular disease and death: systematic review and meta-analysis,  
21 *Diabetologia* 2012;55:2895-905.  
22
- 23 10 Biddle SJ, Pearson N, Ross GM, et al. Tracking of sedentary behaviours of young people:  
24 a systematic review, *Prev Med* 2010;51:345-51.  
25
- 26 11 Janz KF, Burns TL, Levy SM, et al. Tracking of activity and sedentary behaviors in  
27 childhood: the Iowa Bone Development Study, *Am J Prev Med* 2005;29:171-8.  
28
- 29 12 Jones RA, Hinkley T, Okely AD, et al. Tracking physical activity and sedentary behavior  
30 in childhood: a systematic review, *Am J Prev Med* 2013;44:651-8.  
31
- 32 13 McVeigh JA, Zhu K, Mountain J, et al. Longitudinal Trajectories of Television Watching  
33 Across Childhood and Adolescence Predict Bone Mass at Age 20 Years in the Raine Study, *J*  
34 *Bone Miner Res* 2016.  
35
- 36 14 De Craemer M, Lateva M, Iotova V, et al. Differences in energy balance-related  
37 behaviours in European preschool children: the ToyBox-study, *PLoS One* 2015;10:e0118303.  
38
- 39 15 Cameron AJ, Spence AC, Laws R, et al. A Review of the Relationship Between  
40 Socioeconomic Position and the Early-Life Predictors of Obesity, *Curr Obes Rep* 2015;4:350-  
41 62.  
42
- 43 16 Hinkley T, Salmon J, Okely AD, et al. Correlates of sedentary behaviours in preschool  
44 children: a review, *Int J Behav Nutr Phys Act* 2010;7:66,5868-7-66.  
45
- 46 17 Hoyos Cillero I, Jago R. Systematic review of correlates of screen-viewing among young  
47 children, *Prev Med* 2010;51:3-10.  
48
- 49 18 De Craemer M, De Decker E, De Bourdeaudhuij I, et al. Correlates of energy balance-  
50 related behaviours in preschool children: a systematic review, *Obes Rev* 2012;13 Suppl 1:13-  
51 28.  
52  
53  
54  
55  
56  
57  
58  
59  
60

1  
2  
3 19 De Craemer M, Lateva M, Iotova V, et al. Differences in energy balance-related  
4 behaviours in European preschool children: the ToyBox-study, *PLoS One* 2015;10:e0118303.

5  
6 20 Ball K, Crawford D. Socio-economic factors in obesity: a case of slim chance in a fat  
7 world? *Asia Pacific Journal of Clinical Nutrition* 2006;15:15-20.

8  
9 21 Glymour MM, Avendano M, Kawachi I. Socioeconomic status and health. In: Berkman  
10 LF, Kawachi I, Glymour MM, eds. *Social epidemiology*. New York: Oxford University Press  
11 2014:17-62.

12  
13 22 Mantziki K, Vassilopoulos A, Radulian G, et al. Inequities in energy-balance related  
14 behaviours and family environmental determinants in European children: baseline results of  
15 the prospective EPHE evaluation study, *BMC Public Health* 2015;15:1203,015-2540-5.

16  
17 23 Arundell L, Fletcher E, Salmon J, et al. A systematic review of the prevalence of sedentary  
18 behavior during the after-school period among children aged 5-18 years, *Int J Behav Nutr*  
19 *Phys Act* 2016;13:93,016-0419-1.

20  
21 24 Beck J, Chard CA, Hilzendegen C, et al. In-school versus out-of-school sedentary behavior  
22 patterns in U.S. children, *BMC Obes* 2016;3:34,016-0115-3. eCollection 2016.

23  
24 25 Hesketh KR, McMinn AM, Ekelund U, et al. Objectively measured physical activity in  
25 four-year-old British children: a cross-sectional analysis of activity patterns segmented across  
26 the day, *Int J Behav Nutr Phys Act* 2014;11:1,5868-11-1.

27  
28 26 Määttä S, Lehto R, Nislin M, et al. Increased health and wellbeing in preschools (DAGIS):  
29 rationale and design for a randomized control, *BMC public health* 2015;15:402.

30  
31 27 National Institute for Health and Welfare. Lasten päivähöito [Children's early childhood  
32 education and care 2015], *Statistical report 21/2019*, 29.12.2016. 2016.

33  
34 28 Janssen X, Cliff DP, Reilly JJ, et al. Predictive validity and classification accuracy of  
35 ActiGraph energy expenditure equations and cut-points in young children, *PLoS One*  
36 2013;8:e79124.

37  
38 29 Pate RR, Almeida MJ, McIver KL, et al. Validation and calibration of an accelerometer in  
39 preschool children, *Obesity (Silver Spring)* 2006;14:2000-6.

40  
41 30 Puyau MR, Adolph AL, Vohra FA, et al. Validation and calibration of physical activity  
42 monitors in children, *Obes Res* 2002;10:150-7.

43  
44 31 Evenson KR, Catellier DJ, Gill K, et al. Calibration of two objective measures of physical  
45 activity for children, *J Sports Sci* 2008;26:1557-65.

46  
47 32 Ridgers ND, Salmon J, Ridley K, et al. Agreement between activPAL and ActiGraph for  
48 assessing children's sedentary time, *Int J Behav Nutr Phys Act* 2012;9:15,5868-9-15.

49  
50 33 Trost SG, Loprinzi PD, Moore R, et al. Comparison of accelerometer cut points for  
51 predicting activity intensity in youth, *Med Sci Sports Exerc* 2011;43:1360-8.

- 1  
2  
3 34 Byun W, Beets MW, Pate RR. Sedentary Behavior in Preschoolers: How Many Days of  
4 Accelerometer Monitoring Is Needed? *Int J Environ Res Public Health* 2015;12:13148-61.  
5  
6 35 Hinkley T, O'Connell E, Okely AD, et al. Assessing volume of accelerometry data for  
7 reliability in preschool children, *Med Sci Sports Exerc* 2012;44:2436-41.  
8  
9 36 Rich C, Geraci M, Griffiths L, et al. Quality control methods in accelerometer data  
10 processing: defining minimum wear time, *PLoS One* 2013;8:e67206.  
11  
12 37 Wen LM, van der Ploeg HP, Kite J, et al. A Validation Study of Assessing Physical  
13 Activity and Sedentary Behavior in Children Aged 3 to 5 Years, *Pediatric Exercise Science*  
14 2010;22:408.  
15  
16 38 Statistics Finland. Official Statistics of Finland (OSF): Income distribution statistics [e-  
17 publication].2016.  
18  
19 39 Loprinzi PD, Schary DP, Cardinal BJ. Adherence to active play and electronic media  
20 guidelines in preschool children: gender and parental education considerations, *Matern Child*  
21 *Health J* 2013;17:56-61.  
22  
23 40 Vorwerg Y, Petroff D, Kiess W, et al. Physical Activity in 3–6 Year Old Children  
24 Measured by SenseWear Pro®: Direct Accelerometry in the Course of the Week and Relation  
25 to Weight Status, Media Consumption, and Socioeconomic Factors, *PLOS ONE* 2013:e60619.  
26  
27 41 Wijtzes AI, Jansen W, Kamphuis CB, et al. Increased risk of exceeding entertainment-  
28 media guidelines in preschool children from low socioeconomic background: the Generation  
29 R Study, *Prev Med* 2012;55:325-9.  
30  
31 42 Mielke GI, Brown WJ, Nunes BP, et al. Socioeconomic Correlates of Sedentary Behavior  
32 in Adolescents: Systematic Review and Meta-Analysis, *Sports Med* 2017;47:61-75.  
33  
34 43 Bentley GF, Turner KM, Jago R. Mothers' views of their preschool child's screen-viewing  
35 behaviour: a qualitative study, *BMC public health* 2016;16.  
36  
37 44 Evans CA, Jordan AB, Horner J. Only Two Hours? A Qualitative Study of the Challenges  
38 Parents Perceive in Restricting Child Television Time, *Journal of Family Issues*  
39 2015;32:1223-44.  
40  
41 45 Tandon PS, Zhou C, Sallis JF, et al. Home environment relationships with children's  
42 physical activity, sedentary time, and screen time by socioeconomic status, *Int J Behav Nutr*  
43 *Phys Act* 2012;9:88,5868-9-88.  
44  
45 46 Granich J, Rosenberg M, Knuiman M, et al. Understanding children's sedentary behaviour:  
46 a qualitative study of the family home environment, *Health Educ Res* 2010;25:199-210.  
47  
48 47 Jago R, Edwards M, Urbanski CR, et al. General and specific approaches to media  
49 parenting: a systematic review of current measures, associations with screen-viewing, and  
50 measurement implications. *Childhood Obesity* 2013;9:51-72.  
51  
52  
53  
54  
55  
56  
57  
58  
59  
60

- 1  
2  
3 48 Jago R, Sebire SJ, Lucas PJ, et al. Parental modelling, media equipment and screen-  
4 viewing among young children: cross-sectional study, *BMJ Open*  
5 2013;3:10.1136/bmjopen,2013-002593. Print 2013.  
6
- 7 49 Jago R, Stamatakis E, Gama A, et al. Parent and child screen-viewing time and home  
8 media environment, *Am J Prev Med* 2012;43:150-8.  
9
- 10 50 Schoeppe S, Rebar AL, Short CE, et al. How is adults' screen time behaviour influencing  
11 their views on screen time restrictions for children? A cross-sectional study, *BMC Public*  
12 *Health* 2016;16:201,016-2789-3.  
13
- 14 51 Hinkley T, Carson V, Kalomakaefu K, et al. What mums think matters: A mediating  
15 model of maternal perceptions of the impact of screen time on preschoolers' actual screen  
16 time, *Prev Med Rep* 2017;6:339-45.  
17
- 18 52 Schmidt ME, Haines J, O'Brien A, et al. Systematic review of effective strategies for  
19 reducing screen time among young children, *Obesity (Silver Spring)* 2012;20:1338-54.  
20
- 21 53 Miller DT, Prentice DA. Changing Norms to Change Behavior, *Annu Rev Psychol*  
22 2016;67:339-61.  
23
- 24 54 Carson V, Clark M, Berry T, et al. A qualitative examination of the perceptions of parents  
25 on the Canadian Sedentary Behaviour Guidelines for the early years, *Int J Behav Nutr Phys*  
26 *Act* 2014;11:65,5868-11-65.  
27
- 28 55 Carson V, Tremblay MS, Spence JC, et al. The Canadian Sedentary Behaviour Guidelines  
29 for the Early Years (zero to four years of age) and screen time among children from Kingston,  
30 Ontario, *Paediatr Child Health* 2013;18:25-8.  
31
- 32 56 De Decker E, De Craemer M, De Bourdeaudhuij I, et al. Influencing factors of screen time  
33 in preschool children: an exploration of parents' perceptions through focus groups in six  
34 European countries, *Obes Rev* 2012;13 Suppl 1:75-84.  
35
- 36 57 Dwyer GM, Higgs J, Hardy LL, et al. What do parents and preschool staff tell us about  
37 young children's physical activity: a qualitative study, *Int J Behav Nutr Phys Act*  
38 2008;5:66,5868-5-66.  
39
- 40 58 He M, Irwin JD, Sangster Bouck LM, et al. Screen-viewing behaviors among preschoolers  
41 parents' perceptions, *Am J Prev Med* 2005;29:120-5.  
42
- 43 59 Radesky JS, Schumacher J, Zuckerman B. Mobile and interactive media use by young  
44 children: the good, the bad, and the unknown, *Pediatrics* 2015;135:1-3.  
45
- 46 60 Mollborn S, Lawrence E, James-Hawkins L, et al. When Do Socioeconomic Resources  
47 Matter Most in Early Childhood? *Adv Life Course Res* 2014;20:56-9.  
48
- 49 61 Radesky JS, Kistin CJ, Zuckerman B, et al. Patterns of mobile device use by caregivers  
50 and children during meals in fast food restaurants, *Pediatrics* 2014;133:e843-9.  
51  
52  
53  
54  
55  
56  
57  
58  
59  
60

1  
2  
3 62 Pulsford RM, Griew P, Page AS, et al. Socioeconomic position and childhood sedentary  
4 time: evidence from the PEACH project, *Int J Behav Nutr Phys Act* 2013;10:105,5868-10-  
5 105.  
6

7 63 The Finnish National Agency of Education. Early Childhood education and care.;2016.  
8

9  
10 64 Määttä S, Ray C, Roos G, et al. Applying a Socioecological Model to Understand  
11 Preschool Children's Sedentary Behaviors from the Viewpoints of Parents and Preschool  
12 Personnel, *Early Childhood Education Journal* 2016;44:491-502.  
13

14 65 Corder K, Crespo NC, van Sluijs EM, et al. Parent awareness of young children's physical  
15 activity, *Prev Med* 2012;55:201-5.  
16

17 66 Verbestel V, De Henauw S, Bammann K, et al. Are context-specific measures of parental-  
18 reported physical activity and sedentary behaviour associated with accelerometer data in 2-9-  
19 year-old European children? *Public Health Nutr* 2015;18:860-8.  
20

21 67 Bryant M, Lucove J, Evenson K, et al. Measurement of television viewing in children and  
22 adolescents: a systematic review. *Obesity Reviews* 2007;8:197-209.  
23  
24  
25  
26  
27  
28  
29  
30  
31  
32  
33  
34  
35  
36  
37  
38  
39  
40  
41  
42  
43  
44  
45  
46  
47  
48  
49  
50  
51  
52  
53  
54  
55  
56  
57  
58  
59  
60



Supplementary material. The example of parent-reported diary measuring preschool children’s screen time and reading time in the Increased Health and Wellbeing in Preschool (DAGIS) study conducted between years 2015 and 2016 in Finland

# Day X

The date: \_\_\_/\_\_\_/2015

Did your child do any of the following activities today in sitting or being still?

|                                                 | YES                   | NO                    | Times | Total time (h/min) |
|-------------------------------------------------|-----------------------|-----------------------|-------|--------------------|
| 1. Television viewing                           | <input type="radio"/> | <input type="radio"/> | _____ | _____              |
| 2. DVD's or videos watching                     | <input type="radio"/> | <input type="radio"/> | _____ | _____              |
| 3. Tablet computer or smart phone use           | <input type="radio"/> | <input type="radio"/> | _____ | _____              |
| 4. Computer use or playing computer games       | <input type="radio"/> | <input type="radio"/> | _____ | _____              |
| 6. Reading or being read to or looking at books | <input type="radio"/> | <input type="radio"/> | _____ | _____              |

1  
2  
3  
4  
5  
6  
7  
8  
9  
10  
11  
12  
13  
14  
15  
16  
17  
18  
19  
20  
21  
22  
23  
24  
25  
26  
27  
28  
29  
30  
31  
32  
33  
34  
35  
36  
37  
38  
39  
40  
41  
42  
43  
44  
45  
46  
47

## STROBE Statement—checklist of items that should be included in reports of observational studies

|                           | Item No. | Recommendation                                                                                                                  | Page No. | Relevant text from manuscript                                                                                                                                                                                                                     |
|---------------------------|----------|---------------------------------------------------------------------------------------------------------------------------------|----------|---------------------------------------------------------------------------------------------------------------------------------------------------------------------------------------------------------------------------------------------------|
| <b>Title and abstract</b> | 1        | (a) Indicate the study's design with a commonly used term in the title or the abstract                                          | 1        | Preschool children's context-specific sedentary behaviors and parental socioeconomic status: a cross-sectional study                                                                                                                              |
|                           |          | (b) Provide in the abstract an informative and balanced summary of what was done and what was found                             | 2        | abstract                                                                                                                                                                                                                                          |
| <b>Introduction</b>       |          |                                                                                                                                 |          |                                                                                                                                                                                                                                                   |
| Background/rationale      | 2        | Explain the scientific background and rationale for the investigation being reported                                            | 3-4      | Introduction                                                                                                                                                                                                                                      |
| Objectives                | 3        | State specific objectives, including any prespecified hypotheses                                                                | 4        | This study examines the associations of parental SES a) with preschool children's objectively measured ST over the course of a week, and b) with preschool children's parent-reported screen and reading time at home as indicators of their SBs. |
| <b>Methods</b>            |          |                                                                                                                                 |          |                                                                                                                                                                                                                                                   |
| Study design              | 4        | Present key elements of study design early in the paper                                                                         | 4        |                                                                                                                                                                                                                                                   |
| Setting                   | 5        | Describe the setting, locations, and relevant dates, including periods of recruitment, exposure, follow-up, and data collection | 4-5      | As part of this project a cross-sectional study was conducted between autumn 2015 and spring 2016....                                                                                                                                             |

|                              |    |                                                                                                                                                                                                                                                                                                                                                                                                                                                                                    |     |                                                                                                                                                                                                                                                 |
|------------------------------|----|------------------------------------------------------------------------------------------------------------------------------------------------------------------------------------------------------------------------------------------------------------------------------------------------------------------------------------------------------------------------------------------------------------------------------------------------------------------------------------|-----|-------------------------------------------------------------------------------------------------------------------------------------------------------------------------------------------------------------------------------------------------|
| Participants                 | 6  | <p>(a) <i>Cohort study</i>—Give the eligibility criteria, and the sources and methods of selection of participants. Describe methods of follow-up</p> <p><i>Case-control study</i>—Give the eligibility criteria, and the sources and methods of case ascertainment and control selection. Give the rationale for the choice of cases and controls</p> <p><i>Cross-sectional study</i>—Give the eligibility criteria, and the sources and methods of selection of participants</p> | 4-5 | Parents of 983 children (27% consent rate) gave their written consent for the study. Given the recruitment criterion of including only preschools with....                                                                                      |
|                              |    | <p>(b) <i>Cohort study</i>—For matched studies, give matching criteria and number of exposed and unexposed</p> <p><i>Case-control study</i>—For matched studies, give matching criteria and the number of controls per case</p>                                                                                                                                                                                                                                                    |     |                                                                                                                                                                                                                                                 |
| Variables                    | 7  | Clearly define all outcomes, exposures, predictors, potential confounders, and effect modifiers. Give diagnostic criteria, if applicable                                                                                                                                                                                                                                                                                                                                           | 5-6 | Indicators of sedentary behaviors<br>Children wore an Actigraph W-GT3X accelerometer...                                                                                                                                                         |
| Data sources/<br>measurement | 8* | For each variable of interest, give sources of data and details of methods of assessment (measurement). Describe comparability of assessment methods if there is more than one group                                                                                                                                                                                                                                                                                               | 5-6 | Research assistant attached accelerometer to the child's waist in the preschool. The parents received written instructions about its use. During the seven days the children were wearing the accelerometers the parents filled in a diary .... |
| Bias                         | 9  | Describe any efforts to address potential sources of bias                                                                                                                                                                                                                                                                                                                                                                                                                          | 5-8 | A major recruitment criterion was that there had to be at least one group of children aged 3-6 in the preschool. Eighty-six                                                                                                                     |

1  
2  
3  
4  
5  
6  
7  
8  
9  
10  
11  
12  
13  
14  
15  
16  
17  
18  
19  
20  
21  
22  
23  
24  
25  
26  
27  
28  
29  
30  
31  
32  
33  
34  
35  
36  
37  
38  
39  
40  
41  
42  
43  
44  
45  
46  
47

For peer review only

heads of preschools (56% participation rate) gave their written consent for participation in the study. Once the willingness of the preschools was ascertained information letters and consent forms were distributed to parents via the respective schools...

Study size 10 Explain how the study size was arrived at 6-8

Of the 864 participating children, 17 (2%) did not want to wear the accelerometer and 20 (2%) did not return the diary. In addition, two accelerometers were not installed properly and two were not returned. We therefore had data from 821 children (95% of the participants) to be used in forming the variables...

Continued on next page

|                                                                               |                        |    |                                                                                                                                                                                                                                                                                                           |        |                                                                                                                                                                                                                                                                                           |
|-------------------------------------------------------------------------------|------------------------|----|-----------------------------------------------------------------------------------------------------------------------------------------------------------------------------------------------------------------------------------------------------------------------------------------------------------|--------|-------------------------------------------------------------------------------------------------------------------------------------------------------------------------------------------------------------------------------------------------------------------------------------------|
| 1<br>2<br>3<br>4<br>5<br>6<br>7<br>8<br>9<br>10<br>11<br>12<br>13<br>14<br>15 | Quantitative variables | 11 | Explain how quantitative variables were handled in the analyses. If applicable, describe which groupings were chosen and why                                                                                                                                                                              | 5-7    | The use of TV, computers, tablet computers, smartphones and DVD/Videos were combined into one variable, screen time. The weighted daily averages (5/7 on weekdays and 2/7 at weekends) of screen time and reading were calculated. No data on specific preschool-based SBs were collected |
| 16<br>17<br>18<br>19<br>20<br>21<br>22                                        | Statistical methods    | 12 | (a) Describe all statistical methods, including those used to control for confounding                                                                                                                                                                                                                     | 7      | The analyses were adjusted for municipality, the child's age and gender, and the season during which the accelerometer was used...                                                                                                                                                        |
| 23<br>24<br>25<br>26<br>27<br>28                                              |                        |    | (b) Describe any methods used to examine subgroups and interactions                                                                                                                                                                                                                                       |        |                                                                                                                                                                                                                                                                                           |
| 29<br>30<br>31<br>32<br>33<br>34<br>35<br>36<br>37<br>38<br>39                |                        |    | (c) Explain how missing data were addressed                                                                                                                                                                                                                                                               | 5, 7-8 | Four variables with different time criteria were formed to indicate different times of the week:...                                                                                                                                                                                       |
| 40<br>41<br>42<br>43<br>44<br>45<br>46<br>47                                  |                        |    | (d) <i>Cohort study</i> —If applicable, explain how loss to follow-up was addressed<br><i>Case-control study</i> —If applicable, explain how matching of cases and controls was addressed<br><i>Cross-sectional study</i> —If applicable, describe analytical methods taking account of sampling strategy | 8      | The non-independence of observations due to cluster sampling (children in the preschool groups) was taken into account in the analyses, and the highest SES group was treated as a reference category...                                                                                  |
|                                                                               |                        |    | (e) Describe any sensitivity analyses                                                                                                                                                                                                                                                                     |        |                                                                                                                                                                                                                                                                                           |

## Results

1  
2  
3  
4  
5  
6  
7  
8  
9  
10  
11  
12  
13  
14  
15  
16  
17  
18  
19  
20  
21  
22  
23  
24  
25  
26  
27  
28  
29  
30  
31  
32  
33  
34  
35  
36  
37  
38  
39  
40  
41  
42  
43  
44  
45  
46  
47

|                  |     |                                                                                                                                                                                                   |   |                                                                                                                                                                                                                                                                                                                         |
|------------------|-----|---------------------------------------------------------------------------------------------------------------------------------------------------------------------------------------------------|---|-------------------------------------------------------------------------------------------------------------------------------------------------------------------------------------------------------------------------------------------------------------------------------------------------------------------------|
| Participants     | 13* | (a) Report numbers of individuals at each stage of study—eg numbers potentially eligible, examined for eligibility, confirmed eligible, included in the study, completing follow-up, and analysed | 8 | Of the 864 participating children, 17 (2%) did not want to wear the accelerometer and 20 (2%) did not return the diary. In addition, two accelerometers were not installed properly and two were not returned. We therefore had data from 821 children (95% of the participants) to be used in forming the variables... |
|                  |     | (b) Give reasons for non-participation at each stage                                                                                                                                              |   |                                                                                                                                                                                                                                                                                                                         |
|                  |     | (c) Consider use of a flow diagram                                                                                                                                                                |   |                                                                                                                                                                                                                                                                                                                         |
| Descriptive data | 14* | (a) Give characteristics of study participants (eg demographic, clinical, social) and information on exposures and potential confounders                                                          | 9 | Table 1 Sample Characteristics in the Increased Health and Wellbeing in Preschool (DAGIS) study conducted between years 2015 and 2016 in Finland (N=864)                                                                                                                                                                |
|                  |     | (b) Indicate number of participants with missing data for each variable of interest                                                                                                               |   |                                                                                                                                                                                                                                                                                                                         |
|                  |     | (c) <i>Cohort study</i> —Summarise follow-up time (eg, average and total amount)                                                                                                                  |   |                                                                                                                                                                                                                                                                                                                         |
| Outcome data     | 15* | <i>Cohort study</i> —Report numbers of outcome events or summary measures over time                                                                                                               |   |                                                                                                                                                                                                                                                                                                                         |
|                  |     | <i>Case-control study</i> —Report numbers in each exposure category, or summary measures of exposure                                                                                              |   |                                                                                                                                                                                                                                                                                                                         |
|                  |     | <i>Cross-sectional study</i> —Report numbers of outcome events or summary measures                                                                                                                | 9 | Table 1 Sample Characteristics in the Increased Health and Wellbeing in Preschool (DAGIS) study conducted                                                                                                                                                                                                               |

|              |    |                                                                                                                                                                                                              |      |                                                                                                                                    |
|--------------|----|--------------------------------------------------------------------------------------------------------------------------------------------------------------------------------------------------------------|------|------------------------------------------------------------------------------------------------------------------------------------|
|              |    |                                                                                                                                                                                                              |      | between years 2015 and 2016 in Finland (N=864)                                                                                     |
| Main results | 16 | (a) Give unadjusted estimates and, if applicable, confounder-adjusted estimates and their precision (eg, 95% confidence interval). Make clear which confounders were adjusted for and why they were included | 9-12 | The analyses were adjusted for municipality, the child's age and gender, and the season during which the accelerometer was used... |
|              |    | (b) Report category boundaries when continuous variables were categorized                                                                                                                                    |      |                                                                                                                                    |
|              |    | (c) If relevant, consider translating estimates of relative risk into absolute risk for a meaningful time period                                                                                             |      |                                                                                                                                    |

Continued on next page

|                          |    |                                                                                                                                                                            |       |                                                                                                                                                                                             |
|--------------------------|----|----------------------------------------------------------------------------------------------------------------------------------------------------------------------------|-------|---------------------------------------------------------------------------------------------------------------------------------------------------------------------------------------------|
| Other analyses           | 17 | Report other analyses done—eg analyses of subgroups and interactions, and sensitivity analyses                                                                             |       |                                                                                                                                                                                             |
| <b>Discussion</b>        |    |                                                                                                                                                                            |       |                                                                                                                                                                                             |
| Key results              | 18 | Summarise key results with reference to study objectives                                                                                                                   | 12    | In sum...                                                                                                                                                                                   |
| Limitations              | 19 | Discuss limitations of the study, taking into account sources of potential bias or imprecision. Discuss both direction and magnitude of any potential bias                 | 15    | There are some limitations that should be taken into account in interpreting the results of our study. T                                                                                    |
| Interpretation           | 20 | Give a cautious overall interpretation of results considering objectives, limitations, multiplicity of analyses, results from similar studies, and other relevant evidence | 13-15 | The finding that reading and screen time had opposite relationships with parental SES attests to the necessity of measuring different types of SBs to fully understand the SES differences. |
| Generalisability         | 21 | Discuss the generalisability (external validity) of the study results                                                                                                      | 13-15 | that it encompasses a large sample, including children from 66 different preschools in various municipalities                                                                               |
| <b>Other information</b> |    |                                                                                                                                                                            |       |                                                                                                                                                                                             |
| Funding                  | 22 | Give the source of funding and the role of the funders for the present study and, if applicable, for the original study on which the present article is based              | 16    | This study was financially supported                                                                                                                                                        |

\*Give information separately for cases and controls in case-control studies and, if applicable, for exposed and unexposed groups in cohort and cross-sectional studies.

**Note:** An Explanation and Elaboration article discusses each checklist item and gives methodological background and published examples of transparent reporting. The STROBE checklist is best used in conjunction with this article (freely available on the Web sites of PLoS Medicine at <http://www.plosmedicine.org/>, Annals of Internal Medicine at <http://www.annals.org/>, and Epidemiology at <http://www.epidem.com/>). Information on the STROBE Initiative is available at [www.strobe-statement.org](http://www.strobe-statement.org).



1  
2  
3  
4  
5  
6  
7  
8  
9  
10  
11  
12  
13  
14  
15  
16  
17  
18  
19  
20  
21  
22  
23  
24  
25  
26  
27  
28  
29  
30  
31  
32  
33  
34  
35  
36  
37  
38  
39  
40  
41  
42  
43  
44  
45  
46  
47

ON THE BEHALF OF THE AUTHORS,

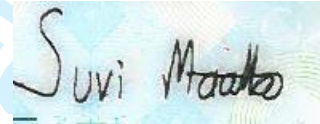A rectangular box containing a handwritten signature in black ink on a light blue background. The signature reads "Suvi Maalo".

For peer review only

# BMJ Open

## Preschool children's context-specific sedentary behaviors and parental socioeconomic status in Finland: a cross-sectional study

|                                 |                                                                                                                                                                                                                                                                                                                                                                                                                                                                                                                                           |
|---------------------------------|-------------------------------------------------------------------------------------------------------------------------------------------------------------------------------------------------------------------------------------------------------------------------------------------------------------------------------------------------------------------------------------------------------------------------------------------------------------------------------------------------------------------------------------------|
| Journal:                        | <i>BMJ Open</i>                                                                                                                                                                                                                                                                                                                                                                                                                                                                                                                           |
| Manuscript ID                   | bmjopen-2017-016690.R2                                                                                                                                                                                                                                                                                                                                                                                                                                                                                                                    |
| Article Type:                   | Research                                                                                                                                                                                                                                                                                                                                                                                                                                                                                                                                  |
| Date Submitted by the Author:   | 14-Sep-2017                                                                                                                                                                                                                                                                                                                                                                                                                                                                                                                               |
| Complete List of Authors:       | Määttä , Suvi; Folkhälsan Research Center; University of Helsinki, Department of Social Research<br>Konttinen, Hanna; University of Helsinki, Department of Social Research; University of Helsinki,, Department of Food and Environmental Sciences<br>Haukkala, Ari; University of Helsinki, Department of Social Research<br>Erkkola, Maijaliisa; University of Helsinki, Department of Food and Environmental Sciences<br>Roos, Eva; Folkhälsan Research Centre; University of Helsinki, Department of Food and Environmental Sciences |
| <b>Primary Subject Heading</b>: | Public health                                                                                                                                                                                                                                                                                                                                                                                                                                                                                                                             |
| Secondary Subject Heading:      | Research methods                                                                                                                                                                                                                                                                                                                                                                                                                                                                                                                          |
| Keywords:                       | PUBLIC HEALTH, SOCIAL MEDICINE, EPIDEMIOLOGY                                                                                                                                                                                                                                                                                                                                                                                                                                                                                              |
|                                 |                                                                                                                                                                                                                                                                                                                                                                                                                                                                                                                                           |

SCHOLARONE™  
Manuscripts

Only

1  
2  
3 Preschool children's context-specific sedentary behaviors and parental socioeconomic status  
4 in Finland: a cross-sectional study  
5  
6

7 Suvi Määttä <sup>1,2</sup> (suvi.maatta@folkhalsan.fi)  
8

9 Hanna Konttinen <sup>2,3</sup> (hanna.konttinen@helsinki.fi)  
10

11 Ari Haukkala <sup>2</sup> (ari.haukkala@helsinki.fi)  
12

13 Maijaliisa Erkkola <sup>3</sup> (majjaliisa.erkkola@helsinki.fi)  
14

15 Eva Roos <sup>1,3,4</sup> (eva.roos@folkhalsan.fi)  
16  
17  
18  
19

### 20 **Author affiliations**

21 <sup>1</sup> Folkhälsan Research Center, Helsinki, Finland  
22

23 <sup>2</sup> University of Helsinki, Department of Social Research, Helsinki, Finland  
24

25 <sup>3</sup> University of Helsinki, Department of Food and Environmental Sciences, Helsinki, Finland  
26

27 <sup>4</sup> University of Helsinki, Clincum, Department of Public Health, Helsinki, Finland  
28  
29

### 30 **Corresponding author:**

31 Suvi Määttä  
32

33 Folkhälsan Research centre, Samfundet Folkhälsan  
34

35 Topeliuksenkatu 20  
36

37 00250 Helsinki, Finland  
38

39 [Suvi.maatta@folkhalsan.fi](mailto:Suvi.maatta@folkhalsan.fi)  
40  
41  
42

### 43 **Word count:**

44 4500  
45  
46  
47  
48  
49  
50  
51  
52  
53  
54  
55  
56  
57  
58  
59  
60

## Abstract

**Objectives:** This study examined the associations of parental socioeconomic status (SES) a) with preschoolers' objectively measured sedentary time (SED) over the course of a week, and b) with parent-reported children's screen and reading times at home as indicators of sedentary behaviors (SB).

**Design:** Cross-sectional.

**Setting:** In years 2015 and 2016 in Finland

**Participants:** 864 children, aged 3-6 years, with their parents.

**Outcome measures:** Children's accelerometer data were transformed into average SED minutes per hour in different contexts (preschool, home during preschool days, weekend and total). Parent-reported children's screen and reading times were expressed as average daily minutes. The SES indicators (maternal and paternal education and relative household income) were grouped into three categories. Linear or logistic regression analyses were used, with municipality, season, and children's gender and age as covariates. Confidence intervals were adjusted for clustering at the preschool-group level.

**Results:** Children with low maternal ( $\beta=17.21$ , 95% CI: 8.71, 25.71) and paternal ( $\beta=10.54$ , 95% CI: 0.77, 20.30) education had more overall screen time at home than their more advantaged counterparts. SES differences in overall screen time were mostly explained by TV viewing. Children with low as opposed to high maternal education ( $\beta=-2.66$ , 95% CI: -4.95, -0.38) had less reading time at home. Children whose fathers were on the middle ( $\beta=-1.15$ , 95% CI: -2.01, -0.29) educational level had less weekend SED than those with high paternal education. Otherwise, parental SES was not related to objectively measured SED.

**Conclusions:** The results of this study highlight the fact that the associations between parental SES and preschoolers' SB are dependent on the indicators of SES and SBs, and vary between different contexts. Generally, parental SES was not associated with SED, whereas some SES differences existed in screen time and reading time at home. Interventions aiming to diminish SES differences in children's SB should focus on home hours.

**Keywords:** sedentary lifestyle, preschool, children, socioeconomic factors

**Strengths and limitations of this study:**

- The major strength of this study is that sedentary behaviors were measured using parent-reported diary and accelerometer in a relative large sample of preschool children.
- The another strength of this study is that the associations between parental socioeconomic status and children's sedentary behaviors were studied in separate contexts (e.g. preschool time, weekend).
- The limitation of this study is that the hip-worn accelerometer may not effectively separate standing from sitting and reclining positions.
- The another limitation of this study is that the parent-reported diary may lead to bias in that parents might be unable to constantly monitor their children's behaviors

**INTRODUCTION**

Children as young as preschool age (defined here as aged 3 through 6 years) spend most of their waking hours in sedentary behaviors (SB) [1], defined as set of activities characterized by low levels of energy expenditure and a sitting or reclining position [2]. The overall sedentary time (SED) can be broken up into separate SB – of which some are more harmful to health than others. The detrimental health effects of extensive screen-based SBs, especially TV viewing, on childhood obesity, other cardiometabolic risk markers, motor-skill development, psychosocial wellbeing and cognitive development are recognized in several studies focusing on early years (roughly ages 0-5) [3-6]. On the other hand, a recent review points out the beneficial effects of reading (or being read to) for cognitive development at preschool-age [3]. There are limited indications of associations between overall objectively measured SED and health indicators among preschool children, but clearer evidence on adverse health outcomes of extensive SED has been found among adults [7-9]. The SB habits formed at the preschool-age tend to maintain throughout life-course, and track over time predicting the future SB habits and health outcomes [10-13]. Given this tracking tendency of SBs together with high levels of SB among contemporary preschool children population [1, 14], understanding of the determinants of overall SED and specific SBs is relevant for health promotion strategies.

One important factor to be studied further is parental socioeconomic status (SES). A recent review concludes that a socioeconomic gradient for many predictors of obesity is established

1  
2  
3 in early childhood, and health inequalities in early childhood predict poorer health later in life  
4 [15]. Most previous studies focus on the associations between SES and preschoolers' TV  
5 viewing, and there is concurrent evidence that preschoolers with a low SES background tend  
6 to spend more time watching TV than their counterparts with a high SES [15-17]. However,  
7 there is very little evidence with inconsistent findings of the possible SES differences in  
8 preschoolers' objectively measured SED or in other specific SBs, such as reading and other  
9 screen-related SBs [15-18]. Other SBs are known to be major contributors to preschoolers'  
10 overall SED [19], and may have different associations with indicators of SES. Similarly,  
11 different indicators of SES (e.g. education and income) may have different associations with  
12 preschoolers' SBs.  
13  
14  
15  
16  
17  
18  
19

20 Existing studies on preschool children also tend to concentrate on weekly average SBs  
21 without considering the possible differences over the course of the week (e.g. weekdays and  
22 at weekends) or in different settings (e.g. preschool or home). For example, there may be no  
23 SES differences in children's SBs during preschool time given that early educators  
24 predetermine most behaviors and allow little flexibility. During out-of-preschool hours (later  
25 referred as home hours), parents have more an important role for planning and deciding the  
26 activities for their children. Given that SES modifies parental attitudes, experiences, and  
27 exposures to different behaviors [20-22], the behavioral variation among children may be  
28 wider at home. The results of studies conducted among school-aged children suggest that  
29 overall SED is higher after school hours and during weekends [23,24], hence it would be  
30 relevant to find out if there are also SES differences in SED. A previous study found that  
31 preschoolers' with higher maternal education had more SED in the evenings [25]. However,  
32 specific SBs were not observed in this study, which could explicate the SES differences in  
33 overall SED. This study examines the associations of parental SES a) with preschool  
34 children's objectively measured SED over the course of a week, and b) with preschool  
35 children's parent-reported overall screen time, screen-specific time (TV viewing, computer  
36 use, DVD/video watching and tablet computer/smartphone use) and reading time at home as  
37 indicators of their SBs.  
38  
39  
40  
41  
42  
43  
44  
45  
46  
47  
48  
49

## 50 **METHODS**

### 51 **Study design**

52 The DAGIS (Increased Health and Wellbeing in Preschools) study is a long-term project with  
53 multiple data-collection phases [26]. As part of this project a cross-sectional study was  
54 conducted between autumn 2015 and spring 2016, the aim being to investigate socioeconomic  
55  
56  
57  
58  
59  
60

1  
2  
3 differences in children's energy-balance-related behaviors (EBRBs). It was a multiple-method  
4 study covering children, parents, and preschools. An ethical permit was obtained from the  
5 University of Helsinki Review Board in the Humanities and Social and Behavioral Sciences.  
6  
7

### 8 **Study population**

9  
10 The cross-sectional study was conducted in eight municipalities situated in Southern and  
11 Western Finland. Municipalities in Finland are responsible for organizing preschool services  
12 based on national guidelines. Each child has a subjective right to a preschool place, and 74  
13 percent of children aged 3-5 years are in preschool. About 76 percent of all children who are  
14 in preschools attend those organized by the municipality[27]. Only municipality-based  
15 preschools were randomly selected for the study. The main recruitment criterion for  
16 preschools was that there had to be at least one group of children aged 3-6 years in the  
17 preschool. The working language in preschool needed to be either Finnish or Swedish. We  
18 also excluded purely pre-primary education classes and preschools that are open for 24 hours  
19 a day.  
20  
21

22 Eighty-six heads of preschools (56% participation rate) gave their written consent for  
23 participation in the study. Once the willingness of the preschools was ascertained information  
24 letters and consent forms were distributed to parents via the respective schools. The main  
25 parental recruitment criterion was to have at least one child aged 3-6 years attending  
26 preschool regularly. Parents of 983 children (27% consent rate) gave their written consent for  
27 the study. Given the recruitment criterion of including only preschools with more than a 30-  
28 percent consent rate in at least one of the groups, the survey was conducted in 66 preschools,  
29 among a total of 892 children whose parents had consented to their participation. However, no  
30 research data were available on 28 children, hence the final total was 864 children (24% of  
31 those invited).  
32  
33

## 34 **MEASURES**

### 35 **Indicators of sedentary behaviors**

36 Children wore an Actigraph W-GT3X accelerometer (Actigraph, Pensacola, Florida) on the  
37 hip 24 hours a day for seven days. Actigraph has been validated and used extensively as an  
38 objective measure of physical activity (PA) and SED [28-30]. Research assistant attached  
39 accelerometer to the child's waist in the preschool. The parents received written instructions  
40 about its use. During the seven days the children were wearing the accelerometers the parents  
41  
42  
43  
44  
45  
46  
47  
48  
49  
50  
51  
52  
53  
54  
55  
56  
57  
58  
59  
60

1  
2  
3 filled in a diary in which they reported their child's sleeping hours and preschool hours, non-  
4 wearing times of the accelerometer, and possible sickness days.

5  
6 The epoch length was set at 15 seconds. Periods of 10 minutes or more at zero accelerometer  
7 counts were considered to be non-wearing times, and were excluded. The Evenson SED cut-  
8 point with vertical axis ( $\leq 100$  counts per minute) was applied [31], having been shown to be  
9 a good estimate of free-living SED [32, 33]. Hours of night sleeping and reported sickness  
10 days were excluded from the analyses. Four variables with different time criteria were formed  
11 to indicate different times of the week: a) total SED time (at least 600 minutes per day, for at  
12 least four days with one weekend-day); b) preschool SED (at least 240 minutes per day, for at  
13 least two days); c) home SED during preschool days (the same days as used in the preschool  
14 variable); d) weekend SED (at least 600 minutes per day). All these variables were adjusted  
15 for the wearing hours so as to indicate the children's SED minutes in an average hour in  
16 different contexts. The presented time criteria were based on previous studies that have  
17 estimated the wearing hours and days that best illustrate preschoolers' habitual SED and PA  
18 during a whole measurement week, or in separate contexts [34-36].

19  
20 The above-mentioned diary included a daily report on the children's SBs that was based on  
21 previously validated method [37]. Of the original method, only the SB section was retained.  
22 We made some modifications to the original version, asking separately about TV watching  
23 and DVD/video watching, and we added the use of tablet computers and smartphones as an  
24 option (please, see the supplementary material 1). The parents were asked to state in the diary  
25 whether their child carried out any of the listed activities while sitting down or being still.  
26 They reported daily on whether the child engaged in a certain activity, how many times and  
27 for how many hours and minutes in total. They were also asked to consider only the time  
28 periods outside preschool hours. We used the following activities from the diary in the present  
29 study: reading or looking at a book (later called reading), TV viewing, DVD/video watching,  
30 computer use, tablet computer and smartphone use. The reported hours and minutes devoted  
31 to these activities were transformed into minutes. The weighted daily averages (5/7 on  
32 weekdays and 2/7 at weekends) of TV viewing, DVD/video watching, computer use, tablet  
33 computer/smartphone use and reading were calculated. The use of TV, computers, tablet  
34 computers, smartphones and DVD/Videos were combined into one variable, screen time, as  
35 well as analyzed separately. No data on specific preschool-based SBs were collected.

### 56 **Indicators of socioeconomic status**

57  
58  
59  
60



1  
2  
3 The educational level of both parents was reported in the consent form: they were asked to  
4 rank their highest educational attainment on a seven-item list. The response options were re-  
5 organized into three groups: a low education was defined as comprehensive schooling  
6 (usually from ages 7 to 16) to secondary education (usually ages 16 to 19); a medium level  
7 refers to a Bachelor's degree; and a high education as at least a Master's Degree.  
8  
9

10  
11 Household income was elicited in the parental questionnaire. The parents were asked to report  
12 the extent of the entire household net income (after tax) on average per month, taking into  
13 account any regular income after tax such as earnings and capital gains, pensions, child  
14 benefits and other social benefits. The response options ranged from less than 500 (1), to over  
15 10,000 (10) Euros per month. The total household net income was divided by the number of  
16 family members using a standard equivalence scale that gave a weight to all members of the  
17 household [38]. This relative household-income variable was categorized into tertiles. Low-  
18 income families had a monthly-equalized income of less than 1,894 Euros, and high-income  
19 families an income of 2,501 Euros or more.  
20  
21

### 22 **Covariates**

23  
24 The analyses were adjusted for municipality, the child's age and gender, and the season  
25 during which the accelerometer was used. Parents reported the child's age and gender. Age  
26 was treated as continuous variable in the analyses. The season variable was divided into three  
27 categories: 1=September-October, 2= November-December, and 3=January-April. Both the  
28 season and the municipality variables were treated as dummy variables.  
29  
30

### 31 **Statistical analyses**

32  
33 The SPSS version 23 (SPSS Inc., Chicago, IL, USA) was used to derive the descriptive  
34 statistics. Screen time (N=4) and home SED (N=1) had outliers beyond three standard  
35 deviations of the mean, and were thus removed from the analyses.  
36  
37

38  
39 Linear regression analyses were conducted to examine the associations between the SES  
40 indicators and each SED variable, overall screen time, and reading time. Logistic regression  
41 analyses were conducted to examine the associations between the SES indicators and TV  
42 viewing, DVD/video watching, computer use and tablet computer/smart phone use. Due to  
43 non-normal distribution, these four variables were dichotomized for logistic regression  
44 analyses so that children with highest 25 percent of using/viewing time were compared to  
45 other children. Mplus Version 7.4. (Muthen & Muthen, Los Angeles, CA, USA) with  
46 Maximum Likelihood Estimation and Robust Standard Errors (MLR) was used to perform  
47  
48  
49  
50  
51  
52  
53  
54  
55  
56  
57  
58  
59  
60

1  
2  
3 linear and logistic regression analyses. The non-independence of observations due to cluster  
4 sampling (children in the preschool groups) was taken into account in the analyses, and the  
5 highest SES group was treated as a reference category. After all the linear and logistic  
6 regression analyses were conducted, Benjamini-Hochberg procedure was carried out for the  
7 obtained p-values to control the false discovery rate [39]. The significance level was  
8 established at  $p < 0.05$  and the false discovery rate was 0.25.  
9  
10

## 11 12 13 **RESULTS**

14 Of the 864 participating children, 17 (2%) did not want to wear the accelerometer and 20  
15 (2%) did not return the diary. In addition, two accelerometers were not installed properly and  
16 two were not returned. We therefore had data from 821 children (95% of the participants) to  
17 be used in forming the variables. In accordance with the criteria presented above, between  
18 772 and 789 children had produced the required amount of accelerometer data for the  
19 analyses. Those who did not produce valid accelerometer data for total time and weekend  
20 SED were more likely to have a mother with a lower level of education than those who  
21 produced valid accelerometer data (data not shown). The overall average of daily wearing  
22 time was 773 minutes. A total of 771 parents filled in the diary properly. There were no  
23 differences in SES indicators between those who produced valid or invalid diary data. Parent-  
24 reported daily screen time correlated positively with objectively measured home SED ( $r = 0.95$ ,  
25  $P = 0.010$ ) and with weekend SED ( $r = 0.92$ ,  $P = 0.013$ ), but negatively with preschool SED ( $r =$   
26  $-0.14$ ,  $P < 0.001$ ). Reading did not correlate with any other outcomes. TV viewing correlated  
27 with preschool SED ( $r = -0.08$ ,  $P = 0.05$ ), weekend SED ( $r = .13$ ,  $P = 0.001$ ), and total SED ( $r = .08$ ,  
28  $P = 0.05$ ). Tablet computer/smartphone use correlated with preschool SED ( $r = -.14$ ,  $P < 0.001$ ),  
29 home SED ( $r = .17$ ,  $P < 0.001$ ), weekend SED ( $r = .14$ ,  $P < 0.001$ ), and total SED ( $r = .08$ ,  $P = .05$ ).  
30 Maternal education correlated with paternal education ( $r = 0.49$ ,  $P < 0.001$ ) and relative  
31 household income ( $r = 0.31$ ,  $P < 0.001$ ), and paternal education correlated with relative  
32 household income ( $r = 0.32$ ,  $P < 0.001$ ). Sample characteristics of the participants are described  
33 in Table 1.  
34  
35  
36  
37  
38  
39  
40  
41  
42  
43  
44  
45  
46  
47  
48  
49  
50  
51  
52  
53  
54  
55  
56  
57  
58  
59  
60

Table 1 Sample Characteristics in the Increased Health and Wellbeing in Preschool (DAGIS) study conducted between years 2015 and 2016 in Finland (N=864)

| Measure                                                            | Value <sup>1</sup> | N   |
|--------------------------------------------------------------------|--------------------|-----|
| Children's age                                                     | 4.73 (.89)         | 864 |
| Children's gender                                                  |                    |     |
| Girls                                                              | 48%                | 413 |
| Boys                                                               | 52%                | 450 |
| Season during which the accelerometer was worn                     |                    |     |
| September-October                                                  | 44%                | 354 |
| November-December                                                  | 36%                | 290 |
| January-April                                                      | 20%                | 164 |
| Maternal education                                                 |                    |     |
| Low (1)                                                            | 30%                | 265 |
| Medium (2)                                                         | 41%                | 358 |
| High (3)                                                           | 29%                | 256 |
| Paternal education                                                 |                    |     |
| Low (1)                                                            | 45%                | 365 |
| Medium (2)                                                         | 33%                | 267 |
| High (3)                                                           | 22%                | 181 |
| Household income                                                   |                    |     |
| Low (1)                                                            | 32%                | 224 |
| Medium (2)                                                         | 34%                | 232 |
| High (3)                                                           | 34%                | 235 |
| Children's sedentary time measured by the accelerometer (min/hour) |                    |     |
| Total time                                                         | 28.11 (4.01)       | 772 |
| Preschool                                                          | 26.47 (5.11)       | 778 |
| Home time in preschool days                                        | 29.74 (4.96)       | 777 |
| Weekend                                                            | 28.47 (4.76)       | 779 |
| Children's sedentary time                                          |                    |     |

1  
2  
3 measured in the diary  
4 (min/day)

|    |                           |                |     |
|----|---------------------------|----------------|-----|
| 5  | Screen time               | 111.02 (48.50) | 767 |
| 6  |                           |                |     |
| 7  | TV viewing                | 56.14 (28.20)  | 771 |
| 8  |                           |                |     |
| 9  | Computer use              | 9.06 (20.32)   | 771 |
| 10 |                           |                |     |
| 11 | Tablet/smart<br>phone use | 21.82 (26.18)  | 771 |
| 12 |                           |                |     |
| 13 | DVD/video<br>watching     | 25.66 (30.50)  | 771 |
| 14 |                           |                |     |
| 15 | Reading                   | 19.19 (11.35)  | 765 |
| 16 |                           |                |     |

17  
18 <sup>1</sup> Values are mean (Standard Deviation) unless otherwise stated. N=864  
19

20  
21  
22 Table 2 presents the results on the associations of maternal education, paternal education, and  
23 relative household income with objectively measured preschool children's SED in different  
24 contexts. According to the findings, children whose fathers had a medium as opposed to a  
25 high level of education had, on average, 1.2 minutes ( 95% CI: -2.01, -0.29) less weekend  
26 SED per hour.  
27  
28  
29  
30  
31  
32  
33  
34  
35  
36  
37  
38  
39  
40  
41  
42  
43  
44  
45  
46  
47  
48  
49  
50  
51  
52  
53  
54  
55  
56  
57  
58  
59  
60

Table 2. The associations between parental socioeconomic status and preschool children's objectively measured sedentary time (minutes/hour) over the course of the week measured by means of linear regression models, adjusted for municipality, season, and the children's gender and age in the Increased Health and Wellbeing in Preschool (DAGIS) study conducted between years 2015 and 2016 in Finland

| Socioeconomic status<br>Indicator        | Sedentary time in preschool |                 |                  | Home sedentary time in<br>preschool days |                     |                  | Sedentary time in weekends |                 |                  | Total<br>sedentary time |                 |                  |
|------------------------------------------|-----------------------------|-----------------|------------------|------------------------------------------|---------------------|------------------|----------------------------|-----------------|------------------|-------------------------|-----------------|------------------|
|                                          | $\beta$                     | Lower<br>95% CI | Higher<br>95% CI | B                                        | Lower<br>95 %<br>CI | Higher<br>95% CI | $\beta$                    | Lower<br>95% CI | Higher<br>95% CI | $\beta$                 | Lower<br>95% CI | Higher<br>95% CI |
| Maternal education (N between 738 – 744) |                             |                 |                  |                                          |                     |                  |                            |                 |                  |                         |                 |                  |
| Low                                      | 0.46                        | -0.45           | 1.36             | 0.47                                     | -0.53               | 1.47             | -0.09                      | -0.71           | 0.90             | 0.33                    | -0.35           | 1.00             |
| Medium                                   | -0.53                       | -1.37           | 0.31             | 0.44                                     | -0.28               | 1.17             | -0.17                      | -0.94           | 0.59             | -0.22                   | -0.83           | 0.40             |
| High (reference)                         |                             |                 |                  |                                          |                     |                  |                            |                 |                  |                         |                 |                  |
| Paternal education (N between 682 – 691) |                             |                 |                  |                                          |                     |                  |                            |                 |                  |                         |                 |                  |
| Low                                      | -0.17                       | -1.14           | 0.79             | 0.05                                     | -0.86               | 0.96             | -0.49                      | -1.25           | 0.27             | -0.02                   | -0.68           | 0.63             |
| Medium                                   | -0.28                       | -1.28           | 0.72             | 0.10                                     | -0.78               | 0.99             | -1.15                      | -2.01           | -0.29            | -0.46                   | -1.10           | 0.18             |
| High (reference)                         |                             |                 |                  |                                          |                     |                  |                            |                 |                  |                         |                 |                  |
| Household income (N between 639 – 646)   |                             |                 |                  |                                          |                     |                  |                            |                 |                  |                         |                 |                  |
| Low                                      | 0.47                        | -0.34           | 1.28             | -0.85                                    | -1.76               | 0.06             | -0.52                      | -1.27           | 0.24             | -0.11                   | -0.74           | 0.51             |
| Medium                                   | -0.34                       | -1.16           | 0.49             | -0.22                                    | -0.99               | 0.54             | -0.05                      | -0.83           | 0.73             | -0.13                   | -0.69           | 0.44             |
| High (reference)                         |                             |                 |                  |                                          |                     |                  |                            |                 |                  |                         |                 |                  |

1  
2  
3  
4  
5 Table 3 presents the results on the associations of maternal education, paternal education, and  
6 relative household income with their children's daily overall screen time and reading time at  
7 home. Compared to children whose mothers had a high level of education, those with a low or  
8 a medium level of maternal education had, respectively and on average, 17.21 (95% CI: 8.71,  
9 25.71) and 11.17 (95% CI: 3.69, 18.64) minutes more screen time daily. Children whose  
10 fathers had a low level of education had 10.54 (95% CI: 0.77, 20.30) minutes more screen  
11 time than their counterparts with high paternal education. Children whose mothers had a low  
12 level of education had, on average, 2.66 (95% CI: -4.95, -0.38) minutes less reading time  
13 daily than their counterparts with high maternal education.  
14  
15  
16  
17  
18  
19  
20  
21  
22  
23  
24  
25  
26  
27  
28  
29  
30  
31  
32  
33  
34  
35  
36  
37  
38  
39  
40  
41  
42  
43  
44  
45  
46  
47  
48  
49  
50  
51  
52  
53  
54  
55  
56  
57  
58  
59  
60

1  
2  
3  
4  
5  
6  
7  
8  
9  
10  
11  
12  
13  
14  
15  
16  
17  
18  
19  
20  
21  
22  
23  
24  
25  
26  
27  
28  
29  
30  
31  
32  
33  
34  
35  
36  
37  
38  
39  
40  
41  
42  
43  
44  
45  
46  
47  
48  
49

Table 3. The associations between parental socioeconomic status and preschool children’s daily average screen and reading time at home measured by means of linear regression analysis, and adjusted for municipality, season, and the children’s gender and age in the Increased Health and Wellbeing in Preschool (DAGIS) study conducted between years 2015 and 2016 in Finland

| Socioeconomic status<br>Indicator        | Daily screen time at home (min/day) |                 |                  | Daily reading time at home (min/day) |                 |                  |
|------------------------------------------|-------------------------------------|-----------------|------------------|--------------------------------------|-----------------|------------------|
|                                          | $\beta$                             | Lower<br>95% CI | Higher<br>95% CI | $\beta$                              | Lower<br>95% CI | Higher<br>95% CI |
| Maternal education (N between 726 – 728) |                                     |                 |                  |                                      |                 |                  |
| Low                                      | 17.21                               | 8.71            | 25.71            | -2.66                                | -4.95           | -0.38            |
| Medium                                   | 11.17                               | 3.69            | 18.64            | -1.82                                | -3.79           | 0.15             |
| High (reference)                         |                                     |                 |                  |                                      |                 |                  |
| Paternal education (N between 674 – 676) |                                     |                 |                  |                                      |                 |                  |
| Low                                      | 10.54                               | 0.77            | 20.30            | -2.31                                | -4.85           | 0.23             |
| Medium                                   | -1.17                               | -11.07          | 8.74             | -1.66                                | -4.32           | 0.99             |
| High (reference)                         |                                     |                 |                  |                                      |                 |                  |
| Household income (N=628)                 |                                     |                 |                  |                                      |                 |                  |
| Low                                      | 9.82                                | -0.13           | 19.78            | -1.34                                | -3.60           | 0.92             |
| Medium                                   | 6.60                                | -2.41           | 15.60            | 0.14                                 | -2.07           | 2.34             |
| High (reference)                         |                                     |                 |                  |                                      |                 |                  |

1  
2  
3 Table 4 presents the results on the associations of maternal education, paternal education, and  
4 relative household income with their children's TV viewing, computer use, DVD/video  
5 watching, and smartphone/tablet computer use. Compared to children whose mothers had a  
6 high level of education, those with a low or middle level of maternal education had a  
7 significantly increased risk of viewing TV over 72 minutes per day with the highest risk in the  
8 group with the lowest educated mothers (OR in low educated group: 2.59, 95% CI 1.58, 4.26;  
9 OR in middle educated group: 2.00, 95% CI 1.22, 3.27). Children whose fathers had a low  
10 level of education had an increased risk of viewing TV over 72 minutes day (OR: 1.96, 95%  
11 CI 1.21, 3.15) compared to their counterparts with a high paternal education. Compared to  
12 children who had a high level of household income, those with a low or middle level of  
13 household income had an elevated risk of viewing TV over 72 minutes per day with the  
14 highest risk in the group with the lowest income (OR in the low income group: 1.74, 95% CI:  
15 1.05, 2.87; OR in the middle income group: 1.64, 95% CI 1.00, 2.69).

16 Children whose family had a middle level of household income had a higher risk of watching  
17 DVD/videos over 44 minutes per day (OR: 1.68, 95% CI: 1.05, 2.68) and a lower risk of  
18 using tablet computers/smartphones over 33 minutes per day (OR: 0.53, 95% CI: 0.33, 0.84)  
19 compared to their counterparts with a high household income.

20 Using the Benjamini-Hochberg procedure with the false discovery rate of 0.25, the  
21 association between low household income and children's screen time displayed in Table 3  
22 became significant (data not shown). That is, children whose family had a low level of  
23 household income had more screen time compared to their counterparts with a high household  
24 income. All the previously mentioned results remained significant also using the Benjamini-  
25 Hochberg procedure.  
26  
27  
28  
29  
30  
31  
32  
33  
34  
35  
36  
37  
38  
39  
40  
41  
42  
43  
44  
45  
46  
47  
48  
49  
50  
51  
52  
53  
54  
55  
56  
57  
58  
59  
60



Table 4. The associations between parental socioeconomic status and preschool children’s daily average TV viewing, computer use, DVD/video watching and smartphone/tablet computer use measured by means of logistic regression analysis, and adjusted for municipality, season, and the children’s gender and age in the Increased Health and Wellbeing in Preschool (DAGIS) study conducted between years 2015 and 2016 in Finland <sup>1</sup>

| Socioeconomic status        | TV viewing at home (over 72 minutes per day) <sup>2</sup> |      |              | Computer use at home (over 1 minute per day) <sup>2</sup> |      |              | DVD/video watching at home (over 44 minutes per day) <sup>2</sup> |      |              | Smartphone/tablet computer use (over 33 minutes per day) <sup>2</sup> |      |              |
|-----------------------------|-----------------------------------------------------------|------|--------------|-----------------------------------------------------------|------|--------------|-------------------------------------------------------------------|------|--------------|-----------------------------------------------------------------------|------|--------------|
|                             | Indicator                                                 | OR   | Lower 95% CI | Higher 95% CI                                             | OR   | Lower 95% CI | Higher 95% CI                                                     | OR   | Lower 95% CI | Higher 95% CI                                                         | OR   | Lower 95% CI |
| Maternal education (N =731) |                                                           |      |              |                                                           |      |              |                                                                   |      |              |                                                                       |      |              |
| Low                         | 2.59                                                      | 1.58 | 4.26         | 1.14                                                      | 0.77 | 1.68         | 1.12                                                              | 0.68 | 1.84         | 0.98                                                                  | 0.61 | 1.59         |
| Medium                      | 2.00                                                      | 1.22 | 3.27         | 0.67                                                      | 0.45 | 1.02         | 1.27                                                              | 0.80 | 2.00         | 1.38                                                                  | 0.92 | 2.06         |
| High (reference)            |                                                           |      |              |                                                           |      |              |                                                                   |      |              |                                                                       |      |              |
| Paternal education (N= 679) |                                                           |      |              |                                                           |      |              |                                                                   |      |              |                                                                       |      |              |
| Low                         | 1.96                                                      | 1.21 | 3.15         | 1.19                                                      | 0.80 | 1.78         | 0.97                                                              | 0.60 | 1.58         | 0.79                                                                  | 0.49 | 1.26         |
| Medium                      | 1.13                                                      | 0.67 | 1.90         | 1.02                                                      | 0.64 | 1.63         | 0.70                                                              | 0.42 | 1.16         | 1.00                                                                  | 0.63 | 1.58         |
| High (reference)            |                                                           |      |              |                                                           |      |              |                                                                   |      |              |                                                                       |      |              |
| Household income (N=630)    |                                                           |      |              |                                                           |      |              |                                                                   |      |              |                                                                       |      |              |
| Low                         | 1.74                                                      | 1.05 | 2.87         | 1.31                                                      | 0.87 | 1.97         | 1.52                                                              | 0.93 | 2.50         | 0.71                                                                  | 0.43 | 1.18         |
| Medium                      | 1.64                                                      | 1.00 | 2.69         | 1.23                                                      | 0.79 | 1.92         | 1.68                                                              | 1.05 | 2.68         | 0.53                                                                  | 0.33 | 0.84         |
| High (reference)            |                                                           |      |              |                                                           |      |              |                                                                   |      |              |                                                                       |      |              |

<sup>1</sup> Values are odds ratios (95% confidence intervals)

<sup>2</sup> The highest 25% of parental reported children’s screen-specific time in minutes per day (1) was compared to others

## DISCUSSION

The main findings of this study show that children with low parental education had more overall screen time at home than their counterparts with highly educated parents, whereas those whose mothers had a higher as opposed to a lower level of education had more reading time. Screen-specific (TV viewing, DVD/video watching, computer use and tablet computer/smartphone use) analyses indicated that SES differences in overall screen time were mostly explained by TV viewing. Otherwise, parental SES was mainly unrelated to the children's objectively measured SED over the course of the week.

In our study, preschoolers with lower parental education had between 10 (paternal education) and 17 (maternal education) minutes more daily screen time at home than their counterparts with higher parental education. Especially, the children with lower SES backgrounds had an increased risk of viewing TV over 72 minutes per day, compared to children with higher SES backgrounds. Our results support therefore findings of other studies that conclude preschool children with low SES backgrounds tend to have higher risks to exceed the screen time recommendations [40-42]. However, a recent meta-analysis reports that the associations of SES and children's SB are dependent on the country so that SES is inversely associated especially with screen time and TV viewing time in high-income countries whereas SES is positively associated with 'other' screen time such as computers and videos in low-middle-income countries [43]. The clinical relevance of a 10 to 17 minutes educational difference in screen time at home requires further evaluation. The result, however, has public health importance when developing the strategies to diminishing socioeconomic gradient in preschool children's screen time.

Different types of screens have become part of everyday life in families with preschoolers, and controlling screen use may be difficult for parents. Higher as opposed to lower parental education is usually related to enhanced awareness, capabilities and skills in terms of adopting a healthy lifestyle [21]. Screen-time reduction may require additional resources (e.g. financial, time) that parents are not necessarily able to provide, which in turn could add to parental stress [44, 45]. Stress in combination with a lack of resources might make it challenging for parents with a low educational level to limit screen time among their children. Previous studies suggest that parents with lower SES backgrounds have less rules related to TV viewing, allow TV viewing more often, and view TV together with their child more frequently [22, 45, 46]. Other studies suggest that in general, parents might have strict screen

1  
2  
3 time rules for their children, but parents who are high screen users themselves more often fail  
4 to follow these rules and have joint screen time more frequently [47-51]. Parental rules and  
5 restrictions around children's screen time may therefore be important factor to focus in future  
6 interventions aiming to diminish SES gradient in children's screen time. Another potential  
7 factor may be the parental perceptions of suitable screen time for children [52], although  
8 possible SES differences in parental perceptions is less clear. The tighter norm for suitable  
9 children's screen time could mean tighter rules and restrictions around children's screen time.  
10 However, parental perceptions of the suitable amount of screen time as intervention strategy  
11 has not previously been used in interventions focusing on preschool children's screen  
12 time[53], although successful changes have been achieved in other health behavior  
13 interventions focusing on changing norms[54]. More study is anyhow needed to explore the  
14 potential factors acting as mediators in the associations between parental SES and children's  
15 screen time. Such information may help target and design more effective family-based  
16 interventions aiming to diminish socioeconomic gradient in children's screen time.

17  
18  
19  
20  
21  
22  
23  
24  
25  
26  
27 Parents seem to value optimal cognitive development during early childhood [55]. Previous  
28 studies have illustrated that parents of preschool-aged children consider screen-time activities  
29 to be good educational tools, whereas the detrimental effects of extensive screen time on  
30 cognitive development is not mentioned [56-59]. These studies have not taken possible SES  
31 differences into consideration. Parents with a higher level of education might realize the  
32 harmful health effects of increased screen time and place more value on their children's  
33 educational achievements, and therefore encourage them to spend more time with books  
34 instead of watching a screen. It may be that parents with a low educational background do not  
35 realize the detrimental effects of screen time on cognitive development, and place more value  
36 on the educational aspects. Still, it should be acknowledged that some aspects of screen time  
37 could be educational. Applications in touch-screen devices such as tablet computers and smart  
38 phones are being used to an increasing extent as learning tools in preschools, for example.  
39 However, there is little current research about the real educational benefits of using these tools  
40 [60]. The results of some studies suggest that the use of touch-screen devices inhibits social  
41 interaction and children's ability to self-regulate their behavior, although benefits related to  
42 early literacy skills, the stimulation of concentration and the fostering of independent learning  
43 are also acknowledged [60]. Nevertheless, screen time is usually sedentary in nature, and it is  
44 therefore important to limit its use.  
45  
46  
47  
48  
49  
50  
51  
52  
53  
54  
55  
56  
57  
58  
59  
60

1  
2  
3 The finding that reading and screen time had opposite relationships with parental SES attests  
4 to the necessity of measuring different types of SBs to fully understand the SES differences.  
5 SES differences in reading time in early childhood are seldom addressed in SB studies, for  
6 example, although its beneficial influences on cognitive development and school readiness are  
7 recognized [3, 61]. These contradictory SES associations with different types of SBs could  
8 also partly explain the few associations between overall objectively measured SED and  
9 indicators of SES found in this study. It would therefore be relevant to consider whether it  
10 might be more worthwhile focusing on the type of SB than overall SED in research on SES  
11 differences in children's SB. Similarly, the wide variation of screens currently available  
12 ensures variation in the way they are used. Tablet computers and mobile devices are used not  
13 only as behavioral-control tools to calm down or distract children in restaurants and cars, but  
14 also for educational purposes [44, 60, 62]. It may be worth considering the context in which  
15 the devices are used in future studies, as well as potential SES differences in the way they are  
16 used.  
17

18  
19 We did not find any SES differences in SED during preschool hours: to our knowledge, no  
20 other studies have addressed this issue. However, our finding is inconsistent with a previous  
21 study on school-aged children reporting that offspring with parents educated to university  
22 level or higher had less SED in schools than children with less highly educated parents [63].  
23 The school setting with its compulsory lessons is different than the preschool setting,  
24 however. The Finnish preschool model is based on learning by playing, and compulsory pre-  
25 primary education in preparation for official schooling starts at the age of six [64]. We  
26 excluded pre-primary education classes during the recruitment phase of the DAGIS study.  
27 However, we did not measure children's specific SBs during preschool hours in more detail:  
28 we thought it would be too time-consuming to list specific SBs in diaries for each child in the  
29 preschool group. According to our preparatory work before we conducted this cross-sectional  
30 survey, the availability of screens in Finnish preschools is limited [65]. More research is  
31 therefore needed to shed light on the role of preschools in balancing SES differences in  
32 children's SB. Future studies could compare the associations between SES and SB among  
33 children who are attending preschool and those who are mainly cared for at home, for  
34 example.  
35

36  
37 There are some limitations that should be taken into account in interpreting the results of our  
38 study. The DAGIS study is cross-sectional, and therefore the causality between parental SES  
39 and children's SB cannot be fully established. The participation rate of families was low,  
40  
41  
42  
43  
44  
45  
46  
47  
48  
49  
50  
51  
52  
53  
54  
55  
56  
57  
58  
59  
60

1  
2  
3 which may influence the generalizability of our findings. It might be that a selected sample of  
4 participants from preschools participated in this study. Similarly, children who did not  
5 produce valid accelerometer data for total time (6 %) and weekend SED (5 %) were more  
6 likely to have a mother with a lower level of education suggesting that included children are  
7 not representative of the overall study population. There are several accelerometer cut-points  
8 for SED among preschool children, and there is no consensus as to which are the most  
9 suitable. However, the results of a comparative study among 4-6 years old children support  
10 the choice of Evenson cut-points for measuring SED [28]. Moreover, the hip-worn  
11 accelerometer might not give the most accurate measurements because it does not effectively  
12 separate standing from sitting and reclining positions [32]. The information on children's  
13 screen time and reading was based on parental reports, and as with any other reported  
14 information, proxy reports may lead to bias in that parents might be unable to constantly  
15 monitor their children's behaviors [66, 67]. In addition, parents might have under- or over-  
16 reported in socially desirable manner the children's screen time and reading time.  
17 Nevertheless, the diary is generally considered to be more reliable than a few items in a  
18 questionnaire [68]. A major strength of this study is that it encompasses a large sample,  
19 including children from 66 different preschools in various municipalities. Another strength is  
20 that we measured the preschoolers' overall SED and specific SBs, and used several SES  
21 indicators. We also separated the different times of the week from the accelerometer data. We  
22 therefore contributed new information on how parental SES influences engagement in  
23 specific SBs and SED in different contexts. These novel data will be useful for future  
24 interventions focusing on diminishing preschoolers' SBs.  
25  
26  
27  
28  
29  
30  
31  
32  
33  
34  
35  
36  
37  
38  
39

## 40 **Conclusion**

41 The most consistent finding from this study is that overall daily screen time at home is higher  
42 among children with a low parental-educational background even at preschool age. It would  
43 therefore be valuable to develop strategies aimed at diminishing screen time at home among  
44 these children. The findings exemplify the multidimensionality of the relationship between  
45 preschoolers' SBs and parental SES. Including multiple measurements of SBs and several  
46 indicators of parental SES, and taking into account the different contexts over the course of a  
47 week (e.g. preschool, weekend) would deepen understanding of the association between SES  
48 and preschoolers' SB.  
49  
50  
51  
52  
53  
54  
55  
56  
57  
58  
59  
60

1  
2  
3 **Acknowledgements:** The authors thank the preschools and their personnel, and the parents  
4 for their participation in the DAGIS study, and the staff for the data collection.  
5

6 **Authors' contributions:** SM drafted the manuscript and conducted the analyses of this study.  
7 HK helped in conducting the analyses and drafting the manuscript. ME, AH and ER helped in  
8 drafting the manuscript. SM, ME and ER were involved in the design of the study and in  
9 seeking funding for it. ER was the principal investigator of the DAGIS study and was  
10 responsible for the study conduct. All authors revised the article critically for important  
11 intellectual content and approved the final manuscript.  
12  
13  
14  
15  
16

17  
18 **Funding statement:** This study was financially supported by the Folkhälsan Research Center,  
19 The Ministry of Education and Culture in Finland, The Academy of Finland (Grant: 285439),  
20 The Juho Vainio Foundation, The Yrjö Jahnsson Foundation, the Signe and Ane Gyllenberg  
21 Foundation, The Finnish Cultural Foundation/South Ostrobothnia Regional Fund, the Päivikki  
22 and Sakari Sohlberg foundation, and the Medicinska Föreningen Liv och Hälsa.  
23  
24  
25  
26  
27

28 **Conflicts of interest:** none  
29

30 **Ethics approval:** the University of Helsinki Review Board in the Humanities and Social and  
31 Behavioral Sciences  
32

33 **Data sharing statement:** Researchers interested in the data from this study may contact  
34 principal investigator Eva Roos, [eva.roos@folkhalsan.fi](mailto:eva.roos@folkhalsan.fi).  
35  
36  
37

## 38 REFERENCES:

39 1 Verloigne M, Loyen A, Van Hecke L, et al. Variation in population levels of sedentary time  
40 in European children and adolescents according to cross-European studies: a systematic  
41 literature review within DEDIPAC, *Int J Behav Nutr Phys Act* 2016;13:69,016-0395-5.  
42

43 2 Sedentary Behaviour Research Network. Letter to the editor: standardized use of the terms  
44 "sedentary" and "sedentary behaviours", *Applied Physiology, Nutrition, and Metabolism*  
45 2012;37:540-2.  
46  
47

48 3 Carson V, Kuzik N, Hunter S, et al. Systematic review of sedentary behavior and cognitive  
49 development in early childhood, *Prev Med* 2015;78:115-22.  
50

51 <https://doi.org/10.1016/j.ypmed.2015.07.016>

52 4 de Rezende LF, Rodrigues Lopes M, Rey-Lopez JP, et al. Sedentary behavior and health  
53 outcomes: an overview of systematic reviews, *PLoS One* 2014;9:e105620.  
54

55 <https://doi.org/10.1371/journal.pone.0105620>  
56  
57  
58  
59  
60

1  
2  
3 5 Hinkley T, Teychenne M, Downing K, et al. Early childhood physical activity, sedentary  
4 behaviors and psychosocial well-being: a systematic review, *Prev Med* 2014;62:182-92.

5 <https://doi.org/10.1016/j.ypmed.2014.02.007>  
6

7 6 LeBlanc AG, Spence JC, Carson V, et al. Systematic review of sedentary behaviour and  
8 health indicators in the early years (aged 0-4 years), *Appl Physiol Nutr Metab* 2012;37:753-  
9 72.

10 <https://doi.org/10.1139/h2012-063>  
11

12 7 Cliff DP, Hesketh KD, Vella SA, et al. Objectively measured sedentary behaviour and  
13 health and development in children and adolescents: systematic review and meta-analysis,  
14 *Obes Rev* 2016;17:330-44.

15 <https://doi.org/10.1111/obr.12371>  
16

17 8 van Ekris E, Altenburg TM, Singh AS, et al. An evidence-update on the prospective  
18 relationship between childhood sedentary behaviour and biomedical health indicators: a  
19 systematic review and meta-analysis, *Obes Rev* 2016.

20 <https://doi.org/10.1111/obr.12426>  
21

22 9 Wilmot EG, Edwardson CL, Achana FA, et al. Sedentary time in adults and the association  
23 with diabetes, cardiovascular disease and death: systematic review and meta-analysis,  
24 *Diabetologia* 2012;55:2895-905.

25 <https://doi.org/10.1007/s00125-012-2677-z>  
26

27 10 Biddle SJ, Pearson N, Ross GM, et al. Tracking of sedentary behaviours of young people:  
28 a systematic review, *Prev Med* 2010;51:345-51.

29 <https://doi.org/10.1016/j.ypmed.2010.07.018>  
30

31 11 Janz KF, Burns TL, Levy SM, et al. Tracking of activity and sedentary behaviors in  
32 childhood: the Iowa Bone Development Study, *Am J Prev Med* 2005;29:171-8.

33 <https://doi.org/10.1016/j.amepre.2005.06.001>  
34

35 12 Jones RA, Hinkley T, Okely AD, et al. Tracking physical activity and sedentary behavior  
36 in childhood: a systematic review, *Am J Prev Med* 2013;44:651-8.

37 <https://doi.org/10.1016/j.amepre.2013.03.001>  
38

39 13 McVeigh JA, Zhu K, Mountain J, et al. Longitudinal Trajectories of Television Watching  
40 Across Childhood and Adolescence Predict Bone Mass at Age 20 Years in the Raine Study, *J*  
41 *Bone Miner Res* 2016.

42 <https://doi.org/10.1002/jbmr.2890>  
43

44 14 De Craemer M, Lateva M, Iotova V, et al. Differences in energy balance-related  
45 behaviours in European preschool children: the ToyBox-study, *PLoS One* 2015;10:e0118303.

46 <https://doi.org/10.1371/journal.pone.0118303>  
47

48 15 Cameron AJ, Spence AC, Laws R, et al. A Review of the Relationship Between  
49 Socioeconomic Position and the Early-Life Predictors of Obesity, *Curr Obes Rep* 2015;4:350-  
50 62.

51 <https://doi.org/10.1007/s13679-015-0168-5>  
52

53 16 Hinkley T, Salmon J, Okely AD, et al. Correlates of sedentary behaviours in preschool  
54 children: a review, *Int J Behav Nutr Phys Act* 2010;7:66,5868-7-66.  
55  
56  
57  
58  
59  
60

1  
2  
3 17 Hoyos Cillero I, Jago R. Systematic review of correlates of screen-viewing among young  
4 children, *Prev Med* 2010;51:3-10.

5 <https://doi.org/10.1016/j.ypmed.2010.04.012>  
6

7 18 De Craemer M, De Decker E, De Bourdeaudhuij I, et al. Correlates of energy balance-  
8 related behaviours in preschool children: a systematic review, *Obes Rev* 2012;13 Suppl 1:13-  
9 28.

10 <https://doi.org/10.1111/j.1467-789X.2011.00941.x>  
11

12 19 De Craemer M, Lateva M, Iotova V, et al. Differences in energy balance-related  
13 behaviours in European preschool children: the ToyBox-study, *PLoS One* 2015;10:e0118303.

14 <https://doi.org/10.1371/journal.pone.0118303>  
15

16 20 Ball K, Crawford D. Socio-economic factors in obesity: a case of slim chance in a fat  
17 world? *Asia Pacific Journal of Clinical Nutrition* 2006;15:15-20.

18  
19 21 Glymour MM, Avendano M, Kawachi I. Socioeconomic status and health. In: Berkman  
20 LF, Kawachi I, Glymour MM, eds. *Social epidemiology*. New York: Oxford University Press  
21 2014:17-62.

22 <https://doi.org/10.1093/med/9780195377903.003.0002>  
23

24 22 Mantziki K, Vassilopoulos A, Radulian G, et al. Inequities in energy-balance related  
25 behaviours and family environmental determinants in European children: baseline results of  
26 the prospective EPHE evaluation study, *BMC Public Health* 2015;15:1203,015-2540-5.

27 23 Arundell L, Fletcher E, Salmon J, et al. A systematic review of the prevalence of sedentary  
28 behavior during the after-school period among children aged 5-18 years, *Int J Behav Nutr  
29 Phys Act* 2016;13:93,016-0419-1.

30 24 Beck J, Chard CA, Hilzendegen C, et al. In-school versus out-of-school sedentary behavior  
31 patterns in U.S. children, *BMC Obes* 2016;3:34,016-0115-3. eCollection 2016.

32 25 Hesketh KR, McMinn AM, Ekelund U, et al. Objectively measured physical activity in  
33 four-year-old British children: a cross-sectional analysis of activity patterns segmented across  
34 the day, *Int J Behav Nutr Phys Act* 2014;11:1,5868-11-1.

35 <https://doi.org/10.1186/1479-5868-11-1>  
36

37 26 Määttä S, Lehto R, Nislin M, et al. Increased health and wellbeing in preschools (DAGIS):  
38 rationale and design for a randomized control, *BMC public health* 2015;15:402.

39 <https://doi.org/10.1186/s12889-015-1744-z>  
40

41 27 National Institute for Health and Welfare. Lasten päivähöito [Children's early childhood  
42 education and care 2015], Statistical report 21/2019, 29.12.2016. 2016.

43 <http://urn.fi/URN:NBN:fi-fe201709068505>  
44

45 28 Janssen X, Cliff DP, Reilly JJ, et al. Predictive validity and classification accuracy of  
46 ActiGraph energy expenditure equations and cut-points in young children, *PLoS One*  
47 2013;8:e79124.

48 <https://doi.org/10.1371/journal.pone.0079124>  
49

50 29 Pate RR, Almeida MJ, McIver KL, et al. Validation and calibration of an accelerometer in  
51 preschool children, *Obesity (Silver Spring)* 2006;14:2000-6.

52 <https://doi.org/10.1038/oby.2006.234>  
53  
54  
55  
56  
57  
58  
59  
60



1  
2  
3 30 Puyau MR, Adolph AL, Vohra FA, et al. Validation and calibration of physical activity  
4 monitors in children, *Obes Res* 2002;10:150-7.

5 <https://doi.org/10.1038/oby.2002.24>

6  
7 31 Evenson KR, Catellier DJ, Gill K, et al. Calibration of two objective measures of physical  
8 activity for children, *J Sports Sci* 2008;26:1557-65.

9 <https://doi.org/10.1080/02640410802334196>

10  
11 32 Ridgers ND, Salmon J, Ridley K, et al. Agreement between activPAL and ActiGraph for  
12 assessing children's sedentary time, *Int J Behav Nutr Phys Act* 2012;9:15,5868-9-15.

13  
14 33 Trost SG, Loprinzi PD, Moore R, et al. Comparison of accelerometer cut points for  
15 predicting activity intensity in youth, *Med Sci Sports Exerc* 2011;43:1360-8.

16 <https://doi.org/10.1249/MSS.0b013e318206476e>

17  
18 34 Byun W, Beets MW, Pate RR. Sedentary Behavior in Preschoolers: How Many Days of  
19 Accelerometer Monitoring Is Needed? *Int J Environ Res Public Health* 2015;12:13148-61.

20 <https://doi.org/10.3390/ijerph121013148>

21  
22 35 Hinkley T, O'Connell E, Okely AD, et al. Assessing volume of accelerometry data for  
23 reliability in preschool children, *Med Sci Sports Exerc* 2012;44:2436-41.

24 <https://doi.org/10.1249/MSS.0b013e3182661478>

25  
26 36 Rich C, Geraci M, Griffiths L, et al. Quality control methods in accelerometer data  
27 processing: defining minimum wear time, *PLoS One* 2013;8:e67206.

28 <https://doi.org/10.1371/journal.pone.0067206>

29  
30 37 Wen LM, van der Ploeg HP, Kite J, et al. A Validation Study of Assessing Physical  
31 Activity and Sedentary Behavior in Children Aged 3 to 5 Years, *Pediatric Exercise Science*  
32 2010;22:408.

33 <https://doi.org/10.1123/pes.22.3.408>

34  
35 38 Statistics Finland. Official Statistics of Finland (OSF): Income distribution statistics [e-  
36 publication] 2016. [http://www.stat.fi/til/tjkt/index\\_en.html](http://www.stat.fi/til/tjkt/index_en.html) Accessed February, 2017.

37  
38 39 Benjamini Y, Hochberg Y. Controlling the False Discovery Rate: A Practical and  
39 Powerful Approach to Multiple Testing, *Journal of the Royal Statistical Society. Series B*  
40 (Methodological) 1995;57:289-300.

41  
42 40 Loprinzi PD, Schary DP, Cardinal BJ. Adherence to active play and electronic media  
43 guidelines in preschool children: gender and parental education considerations, *Matern Child*  
44 *Health J* 2013;17:56-61.

45 <https://doi.org/10.1007/s10995-012-0952-8>

46  
47 41 Vorwerg Y, Petroff D, Kiess W, et al. Physical Activity in 3–6 Year Old Children  
48 Measured by SenseWear Pro®: Direct Accelerometry in the Course of the Week and Relation  
49 to Weight Status, Media Consumption, and Socioeconomic Factors, *PLOS ONE*  
50 2013:e60619.

51 <https://doi.org/10.1371/journal.pone.0060619>

52  
53 42 Wijtzes AI, Jansen W, Kamphuis CB, et al. Increased risk of exceeding entertainment-  
54 media guidelines in preschool children from low socioeconomic background: the Generation  
55  
56  
57  
58  
59  
60

- 1  
2  
3 R Study, *Prev Med* 2012;55:325-9.  
4 <https://doi.org/10.1016/j.ypmed.2012.07.023>  
5  
6 43 Mielke GI, Brown WJ, Nunes BP, et al. Socioeconomic Correlates of Sedentary Behavior  
7 in Adolescents: Systematic Review and Meta-Analysis, *Sports Med* 2017;47:61-75.  
8 <https://doi.org/10.1007/s40279-016-0555-4>  
9  
10 44 Bentley GF, Turner KM, Jago R. Mothers' views of their preschool child's screen-viewing  
11 behaviour: a qualitative study, *BMC public health* 2016;16.  
12 <https://doi.org/10.1186/s12889-016-3440-z>  
13  
14 45 Evans CA, Jordan AB, Horner J. Only Two Hours? A Qualitative Study of the Challenges  
15 Parents Perceive in Restricting Child Television Time, *Journal of Family Issues*  
16 2015;32:1223-44.  
17 <https://doi.org/10.1177/0192513X11400558>  
18  
19 46 Tandon PS, Zhou C, Sallis JF, et al. Home environment relationships with children's  
20 physical activity, sedentary time, and screen time by socioeconomic status, *Int J Behav Nutr*  
21 *Phys Act* 2012;9:88,5868-9-88.  
22  
23 47 Granich J, Rosenberg M, Knuiman M, et al. Understanding children's sedentary behaviour:  
24 a qualitative study of the family home environment, *Health Educ Res* 2010;25:199-210.  
25 <https://doi.org/10.1093/her/cyn025>  
26  
27 48 Jago R, Edwards M, Urbanski CR, et al. General and specific approaches to media  
28 parenting: a systematic review of current measures, associations with screen-viewing, and  
29 measurement implications. *Childhood Obesity* 2013;9:51-72.  
30 <https://doi.org/10.1089/chi.2013.0031>  
31  
32 49 Jago R, Sebire SJ, Lucas PJ, et al. Parental modelling, media equipment and screen-  
33 viewing among young children: cross-sectional study, *BMJ Open*  
34 2013;3:10.1136/bmjopen,2013-002593. Print 2013.  
35  
36 50 Jago R, Stamatakis E, Gama A, et al. Parent and child screen-viewing time and home  
37 media environment, *Am J Prev Med* 2012;43:150-8.  
38 <https://doi.org/10.1016/j.amepre.2012.04.012>  
39  
40 51 Schoeppe S, Rebar AL, Short CE, et al. How is adults' screen time behaviour influencing  
41 their views on screen time restrictions for children? A cross-sectional study, *BMC Public*  
42 *Health* 2016;16:201,016-2789-3.  
43  
44 52 Hinkley T, Carson V, Kalamakaefu K, et al. What mums think matters: A mediating  
45 model of maternal perceptions of the impact of screen time on preschoolers' actual screen  
46 time, *Prev Med Rep* 2017;6:339-45.  
47 <https://doi.org/10.1016/j.pmedr.2017.04.015>  
48  
49 53 Schmidt ME, Haines J, O'Brien A, et al. Systematic review of effective strategies for  
50 reducing screen time among young children, *Obesity (Silver Spring)* 2012;20:1338-54.  
51 <https://doi.org/10.1038/oby.2011.348>  
52  
53 54 Miller DT, Prentice DA. Changing Norms to Change Behavior, *Annu Rev Psychol*  
54 2016;67:339-61.  
55 <https://doi.org/10.1146/annurev-psych-010814-015013>  
56  
57  
58  
59  
60

1  
2  
3 55 Carson V, Clark M, Berry T, et al. A qualitative examination of the perceptions of parents  
4 on the Canadian Sedentary Behaviour Guidelines for the early years, *Int J Behav Nutr Phys*  
5 *Act* 2014;11:65,5868-11-65.

6  
7 56 Carson V, Tremblay MS, Spence JC, et al. The Canadian Sedentary Behaviour Guidelines  
8 for the Early Years (zero to four years of age) and screen time among children from Kingston,  
9 Ontario, *Paediatr Child Health* 2013;18:25-8.

10 <https://doi.org/10.1093/pch/18.1.25>

11  
12 57 De Decker E, De Craemer M, De Bourdeaudhuij I, et al. Influencing factors of screen time  
13 in preschool children: an exploration of parents' perceptions through focus groups in six  
14 European countries, *Obes Rev* 2012;13 Suppl 1:75-84.

15 <https://doi.org/10.1111/j.1467-789X.2011.00961.x>

16  
17 58 Dwyer GM, Higgs J, Hardy LL, et al. What do parents and preschool staff tell us about  
18 young children's physical activity: a qualitative study, *Int J Behav Nutr Phys Act*  
19 2008;5:66,5868-5-66.

20  
21 59 He M, Irwin JD, Sangster Bouck LM, et al. Screen-viewing behaviors among preschoolers  
22 parents' perceptions, *Am J Prev Med* 2005;29:120-5.

23 <https://doi.org/10.1016/j.amepre.2005.04.004>

24  
25 60 Radesky JS, Schumacher J, Zuckerman B. Mobile and interactive media use by young  
26 children: the good, the bad, and the unknown, *Pediatrics* 2015;135:1-3.

27 <https://doi.org/10.1542/peds.2014-2251>

28  
29 61 Mollborn S, Lawrence E, James-Hawkins L, et al. When Do Socioeconomic Resources  
30 Matter Most in Early Childhood? *Adv Life Course Res* 2014;20:56-9.

31 <https://doi.org/10.1016/j.alcr.2014.03.001>

32  
33 62 Radesky JS, Kistin CJ, Zuckerman B, et al. Patterns of mobile device use by caregivers  
34 and children during meals in fast food restaurants, *Pediatrics* 2014;133:e843-9.

35 <https://doi.org/10.1542/peds.2013-3703>

36  
37 63 Pulsford RM, Griew P, Page AS, et al. Socioeconomic position and childhood sedentary  
38 time: evidence from the PEACH project, *Int J Behav Nutr Phys Act* 2013;10:105,5868-10-  
39 105.

40  
41 64 The Finnish National Agency of Education. Early Childhood education and care. 2016.  
42 [http://www.oph.fi/english/education\\_system/early\\_childhood\\_education](http://www.oph.fi/english/education_system/early_childhood_education). Accessed February,  
43 2017.

44  
45 65 Määttä S, Ray C, Roos G, et al. Applying a Socioecological Model to Understand  
46 Preschool Children's Sedentary Behaviors from the Viewpoints of Parents and Preschool  
47 Personnel, *Early Childhood Education Journal* 2016;44:491-502.

48 <https://doi.org/10.1007/s10643-015-0737-y>

49  
50 66 Corder K, Crespo NC, van Sluijs EM, et al. Parent awareness of young children's physical  
51 activity, *Prev Med* 2012;55:201-5.

52 <https://doi.org/10.1016/j.ypmed.2012.06.021>

53  
54 67 Verbestel V, De Henauw S, Bammann K, et al. Are context-specific measures of parental-  
55 reported physical activity and sedentary behaviour associated with accelerometer data in 2-9-  
56  
57  
58  
59  
60

1  
2  
3 year-old European children? Public Health Nutr 2015;18:860-8.

4 <https://doi.org/10.1017/S136898001400086X>

5  
6 68 Bryant M, Lucove J, Evenson K, et al. Measurement of television viewing in children and  
7 adolescents: a systematic review. Obesity Reviews 2007;8:197-209.

8 <https://doi.org/10.1111/j.1467-789X.2006.00295.x>  
9  
10  
11  
12  
13  
14  
15  
16  
17  
18  
19  
20  
21  
22  
23  
24  
25  
26  
27  
28  
29  
30  
31  
32  
33  
34  
35  
36  
37  
38  
39  
40  
41  
42  
43  
44  
45  
46  
47  
48  
49  
50  
51  
52  
53  
54  
55  
56  
57  
58  
59  
60

1  
2  
3  
4  
5  
6  
7  
8  
9  
10  
11  
12  
13  
14  
15  
16  
17  
18  
19  
20  
21  
22  
23  
24  
25  
26  
27  
28  
29  
30  
31  
32  
33  
34  
35  
36  
37  
38  
39  
40  
41  
42  
43  
44  
45  
46  
47

Supplementary material. The example of parent-reported diary measuring preschool children’s screen time and reading time in the Increased Health and Wellbeing in Preschool (DAGIS) study conducted between years 2015 and 2016 in Finland

# Day X

The date: \_\_\_/\_\_\_/2015

Did your child do any of the following activities today in sitting or being still?

|                                                 | YES                   | NO                    | Times | Total time (h/min) |
|-------------------------------------------------|-----------------------|-----------------------|-------|--------------------|
| 1. Television viewing                           | <input type="radio"/> | <input type="radio"/> | _____ | _____              |
| 2. DVD's or videos watching                     | <input type="radio"/> | <input type="radio"/> | _____ | _____              |
| 3. Tablet computer or smart phone use           | <input type="radio"/> | <input type="radio"/> | _____ | _____              |
| 4. Computer use or playing computer games       | <input type="radio"/> | <input type="radio"/> | _____ | _____              |
| 6. Reading or being read to or looking at books | <input type="radio"/> | <input type="radio"/> | _____ | _____              |

## STROBE Statement—checklist of items that should be included in reports of observational studies

|                           | Item No. | Recommendation                                                                                                                  | Page No. | Relevant text from manuscript                                                                                                                                                                                                                     |
|---------------------------|----------|---------------------------------------------------------------------------------------------------------------------------------|----------|---------------------------------------------------------------------------------------------------------------------------------------------------------------------------------------------------------------------------------------------------|
| <b>Title and abstract</b> | 1        | (a) Indicate the study's design with a commonly used term in the title or the abstract                                          | 1        | Preschool children's context-specific sedentary behaviors and parental socioeconomic status: a cross-sectional study                                                                                                                              |
|                           |          | (b) Provide in the abstract an informative and balanced summary of what was done and what was found                             | 2        | abstract                                                                                                                                                                                                                                          |
| <b>Introduction</b>       |          |                                                                                                                                 |          |                                                                                                                                                                                                                                                   |
| Background/rationale      | 2        | Explain the scientific background and rationale for the investigation being reported                                            | 3-4      | Introduction                                                                                                                                                                                                                                      |
| Objectives                | 3        | State specific objectives, including any prespecified hypotheses                                                                | 4        | This study examines the associations of parental SES a) with preschool children's objectively measured ST over the course of a week, and b) with preschool children's parent-reported screen and reading time at home as indicators of their SBs. |
| <b>Methods</b>            |          |                                                                                                                                 |          |                                                                                                                                                                                                                                                   |
| Study design              | 4        | Present key elements of study design early in the paper                                                                         | 4        |                                                                                                                                                                                                                                                   |
| Setting                   | 5        | Describe the setting, locations, and relevant dates, including periods of recruitment, exposure, follow-up, and data collection | 4-5      | As part of this project a cross-sectional study was conducted between autumn 2015 and spring 2016....                                                                                                                                             |

|                              |    |                                                                                                                                                                                                                                                                                                                                                                                                                                                                                                                                                                                                                                                                                                                          |     |                                                                                                                                                                                                                                                 |
|------------------------------|----|--------------------------------------------------------------------------------------------------------------------------------------------------------------------------------------------------------------------------------------------------------------------------------------------------------------------------------------------------------------------------------------------------------------------------------------------------------------------------------------------------------------------------------------------------------------------------------------------------------------------------------------------------------------------------------------------------------------------------|-----|-------------------------------------------------------------------------------------------------------------------------------------------------------------------------------------------------------------------------------------------------|
| Participants                 | 6  | <p>(a) <i>Cohort study</i>—Give the eligibility criteria, and the sources and methods of selection of participants. Describe methods of follow-up</p> <p><i>Case-control study</i>—Give the eligibility criteria, and the sources and methods of case ascertainment and control selection. Give the rationale for the choice of cases and controls</p> <p><i>Cross-sectional study</i>—Give the eligibility criteria, and the sources and methods of selection of participants</p> <hr/> <p>(b) <i>Cohort study</i>—For matched studies, give matching criteria and number of exposed and unexposed</p> <p><i>Case-control study</i>—For matched studies, give matching criteria and the number of controls per case</p> | 4-5 | Parents of 983 children (27% consent rate) gave their written consent for the study. Given the recruitment criterion of including only preschools with....                                                                                      |
| Variables                    | 7  | Clearly define all outcomes, exposures, predictors, potential confounders, and effect modifiers. Give diagnostic criteria, if applicable                                                                                                                                                                                                                                                                                                                                                                                                                                                                                                                                                                                 | 5-6 | Indicators of sedentary behaviors<br>Children wore an Actigraph W-GT3X accelerometer...                                                                                                                                                         |
| Data sources/<br>measurement | 8* | For each variable of interest, give sources of data and details of methods of assessment (measurement). Describe comparability of assessment methods if there is more than one group                                                                                                                                                                                                                                                                                                                                                                                                                                                                                                                                     | 5-6 | Research assistant attached accelerometer to the child’s waist in the preschool. The parents received written instructions about its use. During the seven days the children were wearing the accelerometers the parents filled in a diary .... |
| Bias                         | 9  | Describe any efforts to address potential sources of bias                                                                                                                                                                                                                                                                                                                                                                                                                                                                                                                                                                                                                                                                | 5-8 | A major recruitment criterion was that there had to be at least one group of children aged 3-6 in the preschool. Eighty-six                                                                                                                     |

|            |    |                                           |     |                                                                                                                                                                                                                                                                                                                         |
|------------|----|-------------------------------------------|-----|-------------------------------------------------------------------------------------------------------------------------------------------------------------------------------------------------------------------------------------------------------------------------------------------------------------------------|
|            |    |                                           |     | heads of preschools (56% participation rate) gave their written consent for participation in the study. Once the willingness of the preschools was ascertained information letters and consent forms were distributed to parents via the respective schools...                                                          |
| Study size | 10 | Explain how the study size was arrived at | 6-8 | Of the 864 participating children, 17 (2%) did not want to wear the accelerometer and 20 (2%) did not return the diary. In addition, two accelerometers were not installed properly and two were not returned. We therefore had data from 821 children (95% of the participants) to be used in forming the variables... |

Continued on next page



1  
2  
3  
4  
5  
6  
7  
8  
9  
10  
11  
12  
13  
14  
15  
16  
17  
18  
19  
20  
21  
22  
23  
24  
25  
26  
27  
28  
29  
30  
31  
32  
33  
34  
35  
36  
37  
38  
39  
40  
41  
42  
43  
44  
45  
46  
47

|                        |    |                                                                                                                                                                                                                                                                                                           |        |                                                                                                                                                                                                                                                                                           |
|------------------------|----|-----------------------------------------------------------------------------------------------------------------------------------------------------------------------------------------------------------------------------------------------------------------------------------------------------------|--------|-------------------------------------------------------------------------------------------------------------------------------------------------------------------------------------------------------------------------------------------------------------------------------------------|
| Quantitative variables | 11 | Explain how quantitative variables were handled in the analyses. If applicable, describe which groupings were chosen and why                                                                                                                                                                              | 5-7    | The use of TV, computers, tablet computers, smartphones and DVD/Videos were combined into one variable, screen time. The weighted daily averages (5/7 on weekdays and 2/7 at weekends) of screen time and reading were calculated. No data on specific preschool-based SBs were collected |
| Statistical methods    | 12 | (a) Describe all statistical methods, including those used to control for confounding                                                                                                                                                                                                                     | 7      | The analyses were adjusted for municipality, the child’s age and gender, and the season during which the accelerometer was used...                                                                                                                                                        |
|                        |    | (b) Describe any methods used to examine subgroups and interactions                                                                                                                                                                                                                                       |        |                                                                                                                                                                                                                                                                                           |
|                        |    | (c) Explain how missing data were addressed                                                                                                                                                                                                                                                               | 5, 7-8 | Four variables with different time criteria were formed to indicate different times of the week:...                                                                                                                                                                                       |
|                        |    | (d) <i>Cohort study</i> —If applicable, explain how loss to follow-up was addressed<br><i>Case-control study</i> —If applicable, explain how matching of cases and controls was addressed<br><i>Cross-sectional study</i> —If applicable, describe analytical methods taking account of sampling strategy | 8      | The non-independence of observations due to cluster sampling (children in the preschool groups) was taken into account in the analyses, and the highest SES group was treated as a reference category...                                                                                  |
|                        |    | (e) Describe any sensitivity analyses                                                                                                                                                                                                                                                                     |        |                                                                                                                                                                                                                                                                                           |

**Results**

|                                                                                           |                  |     |                                                                                                                                                                                                   |   |                                                                                                                                                                                                                                                                                                                         |
|-------------------------------------------------------------------------------------------|------------------|-----|---------------------------------------------------------------------------------------------------------------------------------------------------------------------------------------------------|---|-------------------------------------------------------------------------------------------------------------------------------------------------------------------------------------------------------------------------------------------------------------------------------------------------------------------------|
| 1<br>2<br>3<br>4<br>5<br>6<br>7<br>8<br>9<br>10<br>11<br>12<br>13<br>14<br>15<br>16<br>17 | Participants     | 13* | (a) Report numbers of individuals at each stage of study—eg numbers potentially eligible, examined for eligibility, confirmed eligible, included in the study, completing follow-up, and analysed | 8 | Of the 864 participating children, 17 (2%) did not want to wear the accelerometer and 20 (2%) did not return the diary. In addition, two accelerometers were not installed properly and two were not returned. We therefore had data from 821 children (95% of the participants) to be used in forming the variables... |
| 18                                                                                        |                  |     | (b) Give reasons for non-participation at each stage                                                                                                                                              |   |                                                                                                                                                                                                                                                                                                                         |
| 19                                                                                        |                  |     | (c) Consider use of a flow diagram                                                                                                                                                                |   |                                                                                                                                                                                                                                                                                                                         |
| 20<br>21<br>22<br>23<br>24<br>25<br>26<br>27<br>28<br>29<br>30<br>31<br>32                | Descriptive data | 14* | (a) Give characteristics of study participants (eg demographic, clinical, social) and information on exposures and potential confounders                                                          | 9 | Table 1 Sample Characteristics in the Increased Health and Wellbeing in Preschool (DAGIS) study conducted between years 2015 and 2016 in Finland (N=864)                                                                                                                                                                |
| 33                                                                                        |                  |     | (b) Indicate number of participants with missing data for each variable of interest                                                                                                               |   |                                                                                                                                                                                                                                                                                                                         |
| 34                                                                                        |                  |     | (c) <i>Cohort study</i> —Summarise follow-up time (eg, average and total amount)                                                                                                                  |   |                                                                                                                                                                                                                                                                                                                         |
| 35<br>36<br>37<br>38<br>39<br>40<br>41<br>42                                              | Outcome data     | 15* | <i>Cohort study</i> —Report numbers of outcome events or summary measures over time                                                                                                               |   |                                                                                                                                                                                                                                                                                                                         |
|                                                                                           |                  |     | <i>Case-control study</i> —Report numbers in each exposure category, or summary measures of exposure                                                                                              |   |                                                                                                                                                                                                                                                                                                                         |
|                                                                                           |                  |     | <i>Cross-sectional study</i> —Report numbers of outcome events or summary measures                                                                                                                | 9 | Table 1 Sample Characteristics in the Increased Health and Wellbeing in Preschool (DAGIS) study conducted                                                                                                                                                                                                               |

1  
2  
3  
4  
5  
6  
7  
8  
9  
10  
11  
12  
13  
14  
15  
16  
17  
18  
19  
20  
21  
22  
23  
24  
25  
26  
27  
28  
29  
30  
31  
32  
33  
34  
35  
36  
37  
38  
39  
40  
41  
42  
43  
44  
45  
46  
47

---

between years 2015 and 2016  
in Finland (N=864)

---

|              |    |                                                                                                                                                                                                              |      |                                                                                                                                    |
|--------------|----|--------------------------------------------------------------------------------------------------------------------------------------------------------------------------------------------------------------|------|------------------------------------------------------------------------------------------------------------------------------------|
| Main results | 16 | (a) Give unadjusted estimates and, if applicable, confounder-adjusted estimates and their precision (eg, 95% confidence interval). Make clear which confounders were adjusted for and why they were included | 9-12 | The analyses were adjusted for municipality, the child’s age and gender, and the season during which the accelerometer was used... |
|              |    | (b) Report category boundaries when continuous variables were categorized                                                                                                                                    |      |                                                                                                                                    |
|              |    | (c) If relevant, consider translating estimates of relative risk into absolute risk for a meaningful time period                                                                                             |      |                                                                                                                                    |

Continued on next page

For Peer review only

|                          |    |                                                                                                                                                                            |       |                                                                                                                                                                                             |
|--------------------------|----|----------------------------------------------------------------------------------------------------------------------------------------------------------------------------|-------|---------------------------------------------------------------------------------------------------------------------------------------------------------------------------------------------|
| Other analyses           | 17 | Report other analyses done—eg analyses of subgroups and interactions, and sensitivity analyses                                                                             |       |                                                                                                                                                                                             |
| <b>Discussion</b>        |    |                                                                                                                                                                            |       |                                                                                                                                                                                             |
| Key results              | 18 | Summarise key results with reference to study objectives                                                                                                                   | 12    | In sum...                                                                                                                                                                                   |
| Limitations              | 19 | Discuss limitations of the study, taking into account sources of potential bias or imprecision. Discuss both direction and magnitude of any potential bias                 | 15    | There are some limitations that should be taken into account in interpreting the results of our study. T                                                                                    |
| Interpretation           | 20 | Give a cautious overall interpretation of results considering objectives, limitations, multiplicity of analyses, results from similar studies, and other relevant evidence | 13-15 | The finding that reading and screen time had opposite relationships with parental SES attests to the necessity of measuring different types of SBs to fully understand the SES differences. |
| Generalisability         | 21 | Discuss the generalisability (external validity) of the study results                                                                                                      | 13-15 | that it encompasses a large sample, including children from 66 different preschools in various municipalities                                                                               |
| <b>Other information</b> |    |                                                                                                                                                                            |       |                                                                                                                                                                                             |
| Funding                  | 22 | Give the source of funding and the role of the funders for the present study and, if applicable, for the original study on which the present article is based              | 16    | This study was financially supported                                                                                                                                                        |

\*Give information separately for cases and controls in case-control studies and, if applicable, for exposed and unexposed groups in cohort and cross-sectional studies.

**Note:** An Explanation and Elaboration article discusses each checklist item and gives methodological background and published examples of transparent reporting. The STROBE checklist is best used in conjunction with this article (freely available on the Web sites of PLoS Medicine at <http://www.plosmedicine.org/>, Annals of Internal Medicine at <http://www.annals.org/>, and Epidemiology at <http://www.epidem.com/>). Information on the STROBE Initiative is available at [www.strobe-statement.org](http://www.strobe-statement.org).

1  
2  
3  
4  
5  
6  
7  
8  
9  
10  
11  
12  
13  
14  
15  
16  
17  
18  
19  
20  
21  
22  
23  
24  
25  
26  
27  
28  
29  
30  
31  
32  
33  
34  
35  
36  
37  
38  
39  
40  
41  
42  
43  
44  
45  
46  
47

ON THE BEHALF OF THE AUTHORS,

A rectangular box containing a handwritten signature in black ink on a light blue background. The signature reads "Suvi Maalo".

For peer review only
