# Supplementary material for: Preschool children’s context-specific sedentary behaviours and parental socioeconomic status in Finland: a cross-sectional study
Source: PubMed Central journal article supplement — BMJ Open. 2017 Nov 3;7(11):e016690. doi: 10.1136/bmjopen-2017-016690 (PMC5695314; doi:10.1136/bmjopen-2017-016690), 2017-11-03
Supplement: bmjopen-2017-016690supp001.pdf [file bmjopen-2017-016690supp001.pdf]

Supplementary material. The example of parent-reported diary measuring preschool children's screen time and reading time in the Increased Health and Wellbeing in Preschool (DAGIS) study conducted between years 2015 and 2016 in Finland

# Day X

The date: \_\_\_/\_\_\_/2015

Did your child do any of the following activities today in sitting or being still?

|                                                 | YES                   | NO                    | Times | Total time (h/min) |
|-------------------------------------------------|-----------------------|-----------------------|-------|--------------------|
| 1. Television viewing                           | <input type="radio"/> | <input type="radio"/> | _____ | _____              |
| 2. DVD's or videos watching                     | <input type="radio"/> | <input type="radio"/> | _____ | _____              |
| 3. Tablet computer or smart phone use           | <input type="radio"/> | <input type="radio"/> | _____ | _____              |
| 4. Computer use or playing computer games       | <input type="radio"/> | <input type="radio"/> | _____ | _____              |
| 6. Reading or being read to or looking at books | <input type="radio"/> | <input type="radio"/> | _____ | _____              |
